# Supplementary material for: Public performance reporting and hospital choice: a cross-sectional study of patients undergoing cancer surgery in the Australian private healthcare sector
Source: PubMed Central journal article supplement — BMJ Open. 2018 Apr 27;8(4):e020644. doi: 10.1136/bmjopen-2017-020644 (PMC5922515; doi:10.1136/bmjopen-2017-020644), 2018-04-27
Supplement: bmjopen-2017-020644.draft_revisions.pdf [file bmjopen-2017-020644.draft_revisions.pdf]

# BMJ Open

BMJ Open is committed to open peer review. As part of this commitment we make the peer review history of every article we publish publicly available.

When an article is published we post the peer reviewers' comments and the authors' responses online. We also post the versions of the paper that were used during peer review. These are the versions that the peer review comments apply to.

The versions of the paper that follow are the versions that were submitted during the peer review process. They are not the versions of record or the final published versions. They should not be cited or distributed as the published version of this manuscript.

BMJ Open is an open access journal and the full, final, typeset and author-corrected version of record of the manuscript is available on our site with no access controls, subscription charges or pay-per-view fees (<http://bmjopen.bmj.com>).

If you have any questions on BMJ Open's open peer review process please email [info.bmjopen@bmj.com](mailto:info.bmjopen@bmj.com)

# BMJ Open

## Public performance reporting and hospital choice: A questionnaire of patients undergoing cancer surgery in the private healthcare sector

|                                    |                                                                                                                                                                                                                                                                                                                                                                                                                                                                                                  |
|------------------------------------|--------------------------------------------------------------------------------------------------------------------------------------------------------------------------------------------------------------------------------------------------------------------------------------------------------------------------------------------------------------------------------------------------------------------------------------------------------------------------------------------------|
| Journal:                           | <i>BMJ Open</i>                                                                                                                                                                                                                                                                                                                                                                                                                                                                                  |
| Manuscript ID                      | bmjopen-2017-020644                                                                                                                                                                                                                                                                                                                                                                                                                                                                              |
| Article Type:                      | Research                                                                                                                                                                                                                                                                                                                                                                                                                                                                                         |
| Date Submitted by the Author:      | 15-Nov-2017                                                                                                                                                                                                                                                                                                                                                                                                                                                                                      |
| Complete List of Authors:          | Prang, Khic-Houy; The University of Melbourne, Centre for Health Policy<br>Canaway, Rachel; University of Melbourne,<br>Bismark, Marie; University of Melbourne, Centre for Health Policy<br>Dunt, David; The University of Melbourne, Melbourne School of Population<br>and Global Health<br>Miller, Julie; Royal Melbourne Hospital, Endocrine Surgery Unit; The<br>University of Melbourne, Department of Surgery<br>Kelaher, Margaret; The University of Melbourne, Centre for Health Policy |
| <b>Primary Subject<br>Heading</b>: | Health policy                                                                                                                                                                                                                                                                                                                                                                                                                                                                                    |
| Secondary Subject Heading:         | Public health                                                                                                                                                                                                                                                                                                                                                                                                                                                                                    |
| Keywords:                          | public performance reporting, hospital choice, quality information, cancer,<br>questionnaire                                                                                                                                                                                                                                                                                                                                                                                                     |
|                                    |                                                                                                                                                                                                                                                                                                                                                                                                                                                                                                  |

SCHOLARONE™  
Manuscripts

only

1  
2  
3 Public performance reporting and hospital choice: A questionnaire of patients undergoing cancer  
4  
5 surgery in the private healthcare sector  
6

7 Khic-Houy Prang<sup>1\*</sup>, Rachel Canaway<sup>1</sup>, Marie Bismark<sup>1</sup>, David Dunt<sup>1</sup>, Julie Miller<sup>2,3</sup> and Margaret  
8  
9 Kelaher<sup>1</sup>  
10  
11  
12  
13

14  
15 <sup>1</sup> Centre for Health Policy, Melbourne School of Population and Global Health, The University of  
16  
17 Melbourne, Victoria Australia  
18

19 <sup>2</sup> Endocrine Surgery Unit, The Royal Melbourne Hospital, Victoria Australia  
20

21 <sup>3</sup> Department of Surgery, Melbourne Medical School, The University of Melbourne, Victoria Australia  
22  
23  
24  
25  
26

27 \* Corresponding Author: Khic-Houy Prang  
28

29 Phone: +61 3 90358778  
30

31 Email: [khic-houy.prang@unimelb.edu.au](mailto:khic-houy.prang@unimelb.edu.au)  
32  
33  
34  
35  
36  
37  
38  
39  
40  
41  
42  
43  
44  
45  
46  
47  
48  
49  
50  
51  
52  
53  
54  
55  
56  
57  
58  
59  
60

## Abstract

**Objectives** National mandatory public performance reporting (PPR) for Australian public hospitals, including measures of cancer waiting times, was introduced in 2011. The aims of this study were to assess whether PPR of hospital data is used by patients with breast, bowel or lung cancer when selecting a hospital for elective surgery and how PPR could be improved to meet their information needs.

**Design** A national cross-sectional postal questionnaire.

**Setting** Australian private healthcare sector.

**Participants** Patients with breast, bowel or lung cancer who attended a hospital for elective surgery (n=243) between January and December 2016.

**Outcome measures** Patients' choice of hospital, use of PPR information and preferred areas of PPR information. Descriptive and content analyses were conducted.

**Results** The majority of respondents (94%) attended a private hospital. Almost half could choose a hospital. Choice of hospital was not influenced by PPR data (92% unaware) but by their specialist (90%). Respondents considered PPR to be important (70%) but did not want to see the information, preferring their general practitioners (GPs) to tell them about it (40%). Respondents considered costs of surgery (59%), complications (58%) and success rates (57%) to be important areas of information that should be publicly reported. Almost half suggested that quality indicators be reported at the individual clinician level. Content analysis of the open-ended questions identified four themes: 1) decision-making factors; 2) data credibility; 3) unmet information needs; and 4) unintended consequences.

**Conclusions** Our findings suggest that PPR of hospital data had no substantial impact on patients' choice of hospital. Nonetheless, many respondents expressed interest in using PPR information in the future. To increase PPR awareness and usability, personalised and integrated information on

1  
2  
3 cost and quality of hospitals is required. Dissemination of PPR information via specialists and GPs  
4  
5 could assist patients in interpreting the data and to support decision-making.  
6  
7

#### 8 **Strengths and limitations of the study**

9

- 10 • There have been very few studies on the impacts of PPR on consumers' choice of hospitals in  
11 the private healthcare sector since the introduction of national mandatory PPR of public  
12 hospital data in Australia.  
13
- 14 • This study used a national cross-sectional questionnaire in the private healthcare sector to  
15 assess the use of PPR of hospital data by patients with breast, bowel or lung cancer to  
16 inform hospital choice.  
17
- 18 • Given the growing prevalence of PPR data being disseminated through the internet, this  
19 study provided further insights into the level of demands for PPR and preferred areas of PPR  
20 information.  
21
- 22 • The results are not generalisable to other cancer elective surgeries, younger patients and  
23 public hospitals because of the non-population representative characteristics of respondents  
24 (older women who used private hospitals).  
25  
26  
27  
28  
29  
30  
31  
32  
33  
34  
35  
36  
37  
38  
39  
40  
41  
42  
43  
44  
45  
46  
47  
48  
49  
50  
51  
52  
53  
54  
55  
56  
57  
58  
59  
60

## Introduction

There are growing efforts within healthcare systems internationally to measure and publicly disseminate healthcare providers' performance data for greater transparency, to increase accountability and to improve quality of care [1, 2]. Public performance reporting (PPR) of healthcare providers' data is aimed at improving the quality of care by guiding consumers to select high quality providers over low quality providers. It aims to stimulate quality improvement among providers by identifying areas in which they underperform. These pathways are interconnected by providers' motivation to maintain or increase market share [3].

In many countries, such as the United States (US) and the United Kingdom (UK), PPR of hospital and individual clinician's performance data has been a central feature of government health policy [4]. In Australia, national mandatory PPR of public hospital data was introduced in 2011. All public hospitals are required to provide data to the Australian Institute of Health and Welfare (AIHW) which is then reported via the MyHospitals website [5]. PPR on the MyHospitals website is voluntary for private hospitals. Some private healthcare providers (e.g. Healthscope [6]) and most states/territory government also have their own PPR websites (e.g. the Victorian Health Services Performance [7]).

Prior research indicates that PPR changes healthcare providers' behaviour but has limited impact on consumers' healthcare decision-making [8-10]. Previous research also suggests that consumers want more choice over their healthcare [11]. However, results from questionnaires conducted in the US and the Netherlands showed that most consumers do not use or barely use PPR information when selecting a specialist or a hospital [12-15]. This may be because consumers are not aware of PPR information, they do not have access to it and they do not understand or trust it [8, 15, 16]. Instead, consumers rely on various sources of information to make an informed hospital choice including: advice from their general practitioner (GP); their previous experience; family and friends'

1  
2  
3 experiences; the reputation of the hospital; and the distance of the hospital from their home [13, 14,  
4  
5 17, 18].  
6  
7

8           Given the recent introduction of PPR in Australia, there have been few studies on the  
9  
10 impacts of PPR on Australian consumers' choice of hospitals [19], particularly in the private  
11  
12 healthcare sector [20]. To address this gap, the present study aimed to assess whether PPR of  
13  
14 hospital data was used by patients with breast, bowel or lung cancer to inform hospital choice; the  
15  
16 level of demands for PPR; and how PPR could be improved to meet their information needs. The  
17  
18 focus was on patients with access to private healthcare undergoing cancer elective surgery because  
19  
20 choice of hospital is likely to be possible and cancer waiting times are publicly reported for all public  
21  
22 and some private hospitals [5]. It should be noted that most surgery for cancer is categorised as  
23  
24 'elective' as it falls outside 'emergency' surgery. Elective surgery does not imply non-essential or  
25  
26 cosmetic surgery. It is surgery that is considered necessary following a medical assessment of the  
27  
28 patient but admission can be delayed for at least 24 hours. Public patients are then place on a  
29  
30 hospital waiting list for planned surgery, with recommended maximum wait times classified as  
31  
32 urgent (within 30 days), semi-urgent (within 90 days) or non-urgent [5]. In the private sector,  
33  
34 patients can usually access elective surgery more quickly than in the public sector, especially for  
35  
36 semi-urgent or non-urgent cases. Better understanding of factors that influence hospital choice,  
37  
38 including PPR information, can help explain consumers' decision making processes and inform  
39  
40 policy-makers whether greater resources should be allocated to PPR.  
41  
42  
43

## 44 **Methods**

### 45 *Australian healthcare system*

46  
47  
48  
49  
50           Australia has a universal publicly funded health insurance scheme (Medicare) which provides  
51  
52 free access to public hospitals [21]. Private healthcare insurance is also available and encouraged by  
53  
54 government policy (i.e. high income earners receive a tax penalty for not purchasing, and middle  
55  
56  
57  
58  
59  
60

1  
2  
3 income earners receive a private health cover rebate.) [22]. In 2014-15, there were 10.1 million  
4 (57.1%) Australian adults with private healthcare insurance [23]. Private patients can be treated in  
5 either public or private hospitals, paid entirely by their private healthcare insurance, co-paid with  
6 their private healthcare insurance, or self-funded. Private patients can exercise greater choice of  
7 specialist, hospital and timing of procedures than public patients.  
8  
9  
10  
11  
12

### 13 14 *Study design*

15  
16  
17 This study is part of a larger research program which aims to improve understanding of how  
18 PPR might improve quality of care in public and private hospitals in Australia by examining the  
19 perspectives of multiple stakeholders. Previous components of the research program include  
20 interviews with healthcare consumer advocates, providers, purchasers (public and private funders of  
21 healthcare services) [24], senior hospital clinical administrators [25, 26] and general practitioners  
22 (forthcoming). This component of the research program uses a quantitative approach to understand  
23 the use of PPR information when selecting a hospital for surgery among patients with breast, bowel  
24 or lung cancer. A national cross-sectional study design of the private healthcare sector was  
25 conducted using postal questionnaires.  
26  
27  
28  
29  
30  
31  
32  
33  
34  
35

### 36 37 *Questionnaire design*

38  
39 We developed a short questionnaire with four sections: 1) cancer type; 2) hospital stay; 3)  
40 hospital choice; and 4) about you. The first section included two questions about the type of cancer  
41 the participants had, period of diagnosis, and confirmation of undergoing cancer surgical treatments  
42 between 1<sup>st</sup> January and 31<sup>st</sup> December 2016. The second section included two questions about the  
43 type of hospital they attended (i.e. public or private hospital) and their status (public or private  
44 patient). The third section included 10 questions about factors influencing their hospital choice, the  
45 awareness and use of the available PPR information, preferred areas of PPR information (i.e. quality  
46 and performance indicators), level of data presentation, the importance of PPR information and  
47  
48  
49  
50  
51  
52  
53  
54  
55  
56  
57  
58  
59  
60



1  
2  
3 barriers to using PPR information. This section included two additional open-ended questions about  
4  
5 any concerns or experiences of PPR they would like to share. The final section included demographic  
6  
7 characteristics such as gender, age, marital status, education, employment status, occupation,  
8  
9 income and health care insurance status. The questionnaire was piloted with a consumer group from  
10  
11 Peter MacCallum Cancer Centre in Victoria [27] to identify ambiguities or difficult questions and to  
12  
13 ensure that the questionnaire could be completed in a timely manner. The consumer group included  
14  
15 five women aged between 35-45 years. Four women previously had cancer, including three in the  
16  
17 last 12 months. The questionnaire was revised in response to the comments received from the  
18  
19 consumer group.  
20

### 21 22 *Sample*

23  
24  
25 Participants were identified and contacted by the Australian Government Department of  
26  
27 Human Services (DHS) through their Medicare Benefits Schedule (MBS) records (including procedure  
28  
29 codes). Eligibility criteria included: participants aged 18 years and over; diagnosed with breast,  
30  
31 bowel or lung cancer; and attended an Australian hospital for cancer surgical treatments between 1<sup>st</sup>  
32  
33 January and December 2016. MBS is a list of Medicare services subsidised by the Australian  
34  
35 government [28]. Therefore, the sample included only those who made a Medicare claim (i.e.  
36  
37 private patients in public or private hospital). Patients who did not make a Medicare claim (i.e. public  
38  
39 patients in public hospital in which there are no costs to the patients) are not included. Their records  
40  
41 are managed by the individual state governments. The selection of the appropriate MBS procedure  
42  
43 codes was done by the researchers in consultation with a surgeon who specialises in cancer care.  
44  
45

### 46 47 *Data collection*

48  
49  
50 The postal questionnaire was open between April and July 2017. Study invitations were  
51  
52 mailed out to a random sample of 1,000 eligible participants by the Australia Government DHS. We  
53  
54 required 264 participants to achieve a 90% confidence level with a 5% margin of error. The expected  
55  
56  
57  
58  
59  
60

1  
2  
3 response rates of previous research conducted by the Centre were approximately 20-30%.  
4  
5 Researchers were not provided with contact details of the selected sample. Study invitations  
6  
7 included a cover letter from the DHS, a plain language explanation of the study, the questionnaire  
8  
9 and a reply-paid envelope addressed to the researchers. Each participant received a \$10 e-gift card  
10  
11 as reimbursement for their time if they included an email address with their return questionnaire.  
12

### 13 14 *Data analysis*

15  
16  
17 Descriptive analyses of the closed-ended questions were conducted using the Statistical  
18  
19 Package for the Social Sciences (SPSS) version 23. Content analyses of the two open-ended questions  
20  
21 were conducted using NVivo version 11.  
22

### 23 24 *Ethical considerations*

25  
26  
27 Ethical approval for this study was granted by the Melbourne School of Population and  
28  
29 Global Health Human Ethics Advisory Group, The University of Melbourne. The return of the  
30  
31 questionnaire was taken as an indication of voluntary consent to participate.  
32

## 33 34 **Results**

### 35 36 37 *Sample characteristics*

38  
39  
40 In total, 243 participants completed the questionnaire (24.3% response rate). Compared to  
41  
42 respondents, non-respondents were more likely to be male and younger. The sample was somewhat  
43  
44 representative of the Australian population who had cancer elective surgery. Patients with breast  
45  
46 and lung cancer were slightly over-represented whereas patients with bowel cancer were under-  
47  
48 represented [29].  
49

50  
51 The characteristics of the respondents are described in Table 1. Over 60% of respondents  
52  
53 were diagnosed with breast cancer, 27% with bowel and 10% with lung cancer, with the majority  
54  
55 diagnosed in the last 12 months (70%). Almost all the respondents were women (99%) aged  
56  
57

1  
2  
3 between 55 and 74 years (62%). The majority were born in Australia (77%) and married/in a defacto  
4 relationship (79%). Almost 30% had a bachelor/postgraduate degree, a slight under-representation  
5 of the Australian women population with a bachelor degree or higher [30]. Half of the respondents  
6 were pensioners/retirees and 40% were employed. Of those employed, over 60% worked in a  
7 professional or managerial position. Over half had a household income of less than \$99,999. Fewer  
8 than half (44%) had healthcare benefits (e.g. healthcare card which entitles access to cheaper  
9 prescription medicines). Almost all respondents (97%) had private health insurance, which usually  
10 covered both hospital treatment and extras such as outpatient physiotherapy (88%).  
11  
12  
13  
14  
15  
16  
17  
18

#### 19 20 *Hospital stay and choice* 21

22  
23 Respondents self-reported that 94% attended a private hospital and 6% attended a public  
24 hospital for cancer surgery. Among those who attended a public hospital, 87% were private patients  
25 and 13% were public patients. The small proportion of public patients in the sample may suggest  
26 that some of the care provided involved a private component. Costs of private hospitals were  
27 reportedly covered partly by the respondents and their health insurance (49%) or fully covered by  
28 their health insurance (47%). Almost half (48%) of the respondents attended their preferred  
29 hospital, 28% did not have a choice in hospital, and 25% did not have a hospital preference. Of those  
30 who did not have a choice of hospital, 37% would have liked to have had a choice.  
31  
32  
33  
34  
35  
36  
37  
38  
39  
40

#### 41 *Awareness and use of PPR information* 42

43  
44 Ninety-two percent of respondents reported no awareness of PPR information. Of those  
45 who were aware of it, 88% did not use it when selecting a hospital and 56% considered PPR to be of  
46 little or no importance to inform their choice of hospital. Reasons cited for not using PPR  
47 information included limited choice of hospital, as well as prior experience with certain hospitals,  
48 and trust in the advice of their doctor: "We only have a private and public hospital where I live, so  
49  
50  
51  
52  
53  
54  
55  
56  
57  
58  
59  
60

1  
2  
3 *choice was limited regardless of the information provided”; “I was too sick to do any research at the*  
4  
5 *time. I took advice from my specialist”.*

#### 6 7 8 *Factors influencing hospital choice*

9  
10  
11 Table 2 presents the factors that influenced the choice of hospital. PPR data did not  
12 influence choice of hospital. The most common factors that impacted hospital selection were  
13 specialists (90%), reputation of the hospital (24%), distance to the hospital from home (24%),  
14 patients’ previous experience (18%), and GPs advice (17%).

#### 15 16 17 18 19 20 *Barriers affecting the use of PPR*

21  
22  
23 Table 3 shows the barriers affecting the use of PPR in selecting a hospital. The most common  
24 barriers impeding the use of PPR data included lack of PPR awareness (74%), lack of PPR relevance  
25 (11%) and interested in PPR for their condition solely (10%).

#### 26 27 28 29 30 *Source of PPR information*

31  
32  
33 Despite the lack of PPR awareness and barriers to the use of PPR, overall 71% of  
34 respondents considered PPR to be very important or important to inform their choice or family  
35 members’ future choice of hospital. However, most respondents did not want to access PPR  
36 information themselves, preferring their GPs or other healthcare providers to tell them about it  
37 (40%). Other preferred sources of PPR information included websites (35%), printed  
38 books/directories (10%) and mobile phone applications (3%). A small proportion of respondents did  
39 not want any PPR information (9%).

#### 40 41 42 43 44 45 46 47 48 *Preferred types of PPR information*

49  
50  
51 Table 4 shows the types of PPR information that respondents most wanted access to.  
52 Respondents considered costs of surgery (59%), complications (58%) and success rates (57%)  
53 important areas to report on. Respondents reported that they preferred PPR information to be  
54  
55  
56  
57

1  
2  
3 reported at the individual clinician level (48%), followed by hospitals (31%) and specific clinical units  
4  
5 within hospitals (18%).  
6

7  
8 *Additional comments and concerns related to PPR*  
9

10  
11 Almost half of the respondents (48%) provided information in response to one or both open-  
12  
13 ended questions. Analysis of their responses revealed four themes: 1) decision-making factors; 2)  
14  
15 data credibility; 3) unmet information needs; and 4) unintended consequences. Themes two, three  
16  
17 and four provided further insights into PPR of hospital data which were not captured in the  
18  
19 quantitative findings.  
20

21  
22 *1. Decision-making factors*  
23

24  
25 Consistent with the quantitative findings, choice of hospital was determined by advice from  
26  
27 specialists or GPs rather than PPR information. Although respondents perceived PPR to be important  
28  
29 for hospital's accountability and transparency, they reported that their choices were restricted to  
30  
31 the hospital or hospitals where their specialist performed surgery. Other respondents had relied on  
32  
33 their GP's for a specialist recommendation:  
34  
35

36  
37 "I did not check on the hospital. My surgeon was recommended as the 'best' by my GP  
38  
39 who I trust and she could operate quickly and worked out of a specific hospital - no  
40  
41 choice to be made." (Respondent #39)  
42

43  
44 Some respondents preferred their GPs to be informed about PPR information and relay it to  
45  
46 them, or direct them to an appropriate website or other resource to inform their decision.  
47  
48 Additional factors influencing patients' selection of hospital included family and friends.  
49

50  
51 *2. Data credibility*  
52  
53  
54  
55  
56  
57  
58  
59  
60

1  
2  
3 Although over 90% of respondents reported not being aware of PPR, they nonetheless  
4 raised concerns with the reliability, validity and timeliness of the data. Some were cynical and  
5 suspicious of the data, questioning its trustworthiness:  
6  
7

8  
9  
10 “The hospitals information accuracy. No hospital is going to let ‘issues’ out otherwise  
11 loss of patients means loss of money and so it goes. In an ideal world, we could  
12 ‘believe’ the information and make our decisions as consumers with accuracy. I don't  
13 believe the information will truly reflect the real world. I have seen government  
14 departments fudge stuff.” (Respondent #200)  
15  
16  
17  
18  
19

20  
21 Some respondents expressed their lack of clarity and concern around who collected the data  
22 (i.e. independent body), how it was collated (i.e. qualifications and experiences of the people, data  
23 quality processes), and why certain areas of information (i.e. quality and performance indicators)  
24 were chosen to be reported.  
25  
26  
27  
28  
29

### 30 *3. Unmet information needs*

31  
32

33 Respondents reported the following areas of information (currently not available on the  
34 MyHospitals website) to be of interest: patient experiences; hospital cleanliness; food quality;  
35 nursing standards (e.g. bedside manners); and hospital facilities (e.g. available entertainments such  
36 as movie/tablet rentals). However, several respondents worried that reporting patient experiences  
37 may be misleading and damaging to a hospital’s reputation if there were no site moderators:  
38  
39  
40  
41  
42  
43

44 “As a patient I am not a medical expert as are other patients. We can comment on the  
45 level of care but not the medical treatment. So, my opinion and that of other patients is  
46 very subjective. Just like 'TripAdvisor' someone could rubbish a hospital with no  
47 medical grounds or expertise.” (Respondent #52)  
48  
49  
50  
51  
52

### 53 *4. Unintended consequences*

54  
55  
56  
57  
58  
59  
60

1  
2  
3 Additional PPR concerns raised by respondents included unnecessary stress and increased  
4 pressure on hospital staff because of PPR. Some respondents likened PPR of hospital data to the  
5 education reporting system which compares how a school is performing on the National Assessment  
6 Plan Literacy and Numeracy (NAPLAN) tests with other similar schools. A respondent claimed that  
7 increased focus on reporting in the education sector resulted in poorer education and expressed  
8 concern that PPR of hospital data could similarly lead to a deterioration in the quality of care  
9 provided. Some respondents suggested that the PPR systems need to be design in a way which  
10 minimises administrative burden and is supportive of hospital staff:  
11  
12  
13  
14  
15  
16  
17  
18

19  
20 "It would have to be carefully designed to be fair to all involved without creating  
21 excessive administrative and pressure and hierarchy as sometimes happens in schools  
22 reporting - overly burdensome for staff so counter-productive." (Respondent #57)  
23  
24  
25  
26

## 27 Discussion

28  
29  
30 The results of the study, which are reflective of experiences in the private healthcare sector,  
31 highlighted that many respondents did not use PPR information to inform their hospital choice,  
32 mainly because they were not aware of it. This is consistent with previous studies [12-15]. Instead,  
33 as patients, they were guided by their specialists when selecting a hospital. Almost half of the  
34 respondents reported that they did have a choice of hospital, which suggests they were involved in  
35 the decision-making process with their specialists. Others have reached similar conclusion [31].  
36 Although determining how the specialists and patients selected hospitals was not part of this study,  
37 the responses to the open-ended questions revealed that the availability of specialists and where  
38 he/she performed the elective surgery generally determined which hospital they attended as  
39 patients. Future research is required to explore the decision-making process between specialists and  
40 patients, and whether the dissemination of PPR information to patients via specialists (as potential  
41 mediators of patient choice) is feasible.  
42  
43  
44  
45  
46  
47  
48  
49  
50  
51  
52  
53  
54  
55  
56  
57  
58  
59  
60

1  
2  
3 The limited awareness of PPR among respondents may be associated with the lack of  
4  
5 mandatory PPR for private hospitals. Half of all Australian private hospitals voluntarily participate on  
6  
7 the MyHospitals website but they do not necessarily report on all of the quality indicators that public  
8  
9 hospitals do [5]. Some private healthcare providers (e.g. Healthscope) publish their own PPR  
10  
11 websites to help patients make informed decisions [6]. However, Healthscope reports aggregated  
12  
13 data on quality indicators for all their private hospitals combined, instead of individual hospitals,  
14  
15 specialists or conditions – this limits its relevance and usability for healthcare consumers. Almost half  
16  
17 of the study respondents proposed that publicly reported hospital-related information (which  
18  
19 includes quality and performance indicators) be reported at the level of individual specialists. In the  
20  
21 US and the UK, ratings of individual specialists working in hospitals are publicly reported [4]. There is  
22  
23 evidence that public reporting of individual specialists' data have led to improvement in the quality  
24  
25 of care [32, 33]. However, unintended consequences such as 'cream skimming' and 'gaming' (i.e.  
26  
27 avoiding treating high risk patients who are likely to have poor outcomes) have also been reported  
28  
29 [34, 35]. In Australia, debates surrounding PPR of individual specialist-level continues [36-38].  
30  
31  
32

33 Consistent with previous research, we found the following performance indicators to be of  
34  
35 relevance to patients: costs of surgery; complications rates; success rates; patient experiences;  
36  
37 hospital cleanliness; and food quality [39, 40]. None of these quality indicators are currently  
38  
39 reported on the MyHospitals website [5]. Patient experience is one of 17 indicators recommended  
40  
41 to be publicly reported but methodological issues has prevented its disclosure. In contrast, several  
42  
43 states' performance websites actively report on patient experiences, complications, and standards  
44  
45 of cleaning to various level of details [7, 41-43]; the Bureau of Health Information in New South  
46  
47 Wales the most thorough and interactive in its web-based reporting [41]. In other countries, such as  
48  
49 England, The Netherlands and the US, patient reported experience and outcomes are routinely  
50  
51 collected and available for consumers to view. These measures are found to be positively associated  
52  
53 with delivery of care [44], clinical outcomes [45], clinical effectiveness and patient safety [46].  
54  
55  
56  
57  
58  
59  
60



1  
2  
3           None of the performance websites in Australia describe costs of surgery. There are no costs  
4  
5 associated with attending an Australian public hospital as a public patient. It may not be surprising  
6  
7 then that costs of surgery and associated out-of-pocket costs are not reported. However, knowing  
8  
9 out-of-pocket costs was considered important for patients with private healthcare insurance. Costs  
10  
11 of elective surgery were fully covered by private healthcare insurance in only 47% of cases, with one  
12  
13 respondent commenting that out-of-pocket cost for her breast cancer surgery was \$7,500. In  
14  
15 Australia, there are limited publicly available sources for patients to access information on out-of-  
16  
17 pocket costs for inpatient and outpatient care [47, 48]. The Royal Australasian College of Surgeons in  
18  
19 collaboration with Medibank (an Australian private health insurer), publishes surgical variance  
20  
21 reports which describe average out-of-pocket charges for surgeons and other medical services (i.e.  
22  
23 anaesthetist, assistant surgeon and for diagnostics). Their reports were not targeted at consumers  
24  
25 but for specialists, to encourage improvement in private hospital clinical outcomes and patient care.  
26  
27 In the US, report cards and reporting websites (e.g. OpsCost [49], Healthcare Bluebook [50], Fair  
28  
29 Heath consumers [51]) have been developed to help consumers compare hospital quality and cost of  
30  
31 care. Evaluation of report cards with cost information, in an experimental setting, showed that some  
32  
33 employees avoided low-cost providers because they perceived low-cost care as substandard and  
34  
35 higher prices as proxy for higher quality [52]. The authors suggest that including quality indicators  
36  
37 with costs data may improve consumers' decision-making. Given the limited research in this area  
38  
39 and the growth in comparative quality and cost websites, further studies are warranted to evaluate  
40  
41 its accessibility, usefulness and content for consumers.  
42  
43  
44

45           Although many respondents considered PPR to be important for transparency and  
46  
47 accountability, they were sceptical of the reliability and validity of PPR data. The reason for this is  
48  
49 unclear given that most patients were not aware of PPR. Some comments from the open-ended  
50  
51 questions demonstrated lack of understanding of how PPR data was collected, and collated and the  
52  
53 methodologies used to construct the quality indicators. In support, past research suggests that  
54  
55 consumers distrust PPR data because they have difficulties interpreting the information [8, 16, 53].  
56  
57  
58

1  
2  
3 In the US, consumer-focused best practice guidelines have been developed for presenting,  
4 promoting and disseminating PPR data to improve its comprehensibility and perceived trustworthiness  
5 [40, 54].  
6  
7  
8  
9

10 Patients preferred that the dissemination of PPR information to occur via their GPs. In  
11 Australia, GPs are gatekeepers to secondary care with patients requiring their referral for non-  
12 emergency access. Therefore, GPs are in a good position to help patients interpret PPR data or guide  
13 patients to appropriate resources to support decision-making. However, past research shows that  
14 GPs rarely used PPR information when referring patients to hospitals because they are unaware of  
15 PPR data and they were concerned about its reliability and validity [55, 56]. Addressing these barriers  
16 are essential if GPs are to be a viable source of PPR information for their patients.  
17  
18  
19  
20  
21  
22  
23  
24

#### 25 *Limitations*

26  
27  
28 These findings should be interpreted carefully due to several limitations. Given the non-  
29 population representative characteristics of respondents (older women who used private hospitals),  
30 the results are not generalisable to other cancer elective surgeries, younger patients and public  
31 hospitals. Future research is needed to gather data from a larger sample and to expand this study to  
32 other elective surgeries and public patients in public hospital (could be recruited via the individual  
33 state government which hold their records). Recall bias may have also affected our results,  
34 particularly among elderly patients. However, we attempted to minimise recall bias by ensuring that  
35 only patients who had cancer elective surgery within the last 12 months were eligible to complete  
36 the questionnaire.  
37  
38  
39  
40  
41  
42  
43  
44  
45  
46  
47

#### 48 *Conclusions*

49  
50 PPR of hospital data appears to have no substantial impact on selection of hospitals among a  
51 randomly selected cohort of Australian patients with breast, bowel or lung cancer who were treated  
52 as private patients. Almost one third of respondents reported no choice of hospital and current PPR  
53  
54  
55  
56  
57  
58  
59  
60

1  
2  
3 information did not appear to meet their information needs. Nevertheless, a substantial number  
4  
5 of respondents expressed interest in PPR information and claimed that they would use it in their  
6  
7 future decision-making. Given the growing prevalence of performance data being publicly  
8  
9 disseminated through the internet, further efforts are required to develop quality and cost  
10  
11 indicators of interest to patients. While this study focused on people treated for cancer, it has  
12  
13 relevance for all consumers of healthcare. The dissemination of PPR information to patients via  
14  
15 specialists and GPs may enable patients to make clinically and financially informed choices with the  
16  
17 assistance of their medical doctors.  
18

### 19 20 **Contributors**

21  
22  
23 MK, DD and MB conceptualised and designed the study and obtained its funding. KP, RC and MK  
24  
25 contributed to the design of the questionnaire. KP, MK and JM selected the sample (MBS procedure  
26  
27 codes). KP collected, analysed and interpreted the data and drafted the manuscript. RC, MB, DD, JM  
28  
29 and MK contributed to data interpretation and critically reviewed the manuscript. All authors read  
30  
31 and approved the final manuscript.  
32

### 33 34 **Funding**

35  
36  
37 This research was funded by Medibank Better Health Foundation. Views expressed are those of the  
38  
39 authors and not the funding agency.  
40

### 41 42 **Competing interests**

43  
44  
45 The authors declare that they have no competing interests.  
46

### 47 48 **Data sharing statement**

49  
50  
51 The dataset analysed during the current study are not publicly available due to participants'  
52  
53 confidentiality.  
54

### 55 56 **Acknowledgements**

We wish to thank Medibank Better Health Foundation for funding this research. Steve Gilbert from the Australian Department of Human Services for the mail out of the questionnaires. Finally, we wish to thank all the participants who took the time to complete the questionnaire.

## References

1. Cacace M, Ettelt S, Brereton L, Pedersen JS, Nolte E. How health systems make available information on service providers: Experience in seven countries. *Rand Health Quarterly*. 2011;1(1):11.
2. Rechel B, McKee M, Haas M, Marchildon GP, Bousquet F, Blümel M, et al. Public reporting on quality, waiting times and patient experience in 11 high-income countries. *Health Policy*. 2016;120(4):377-83.
3. Berwick DM, James B, Coye MJ. Connections between quality measurement and improvement. *Medical Care*. 2003;41(1):I-30-I-8.
4. Marshall MN, Shekelle PG, Davies HT, Smith PC. Public reporting on quality in the United States and the United Kingdom. *Health Affairs*. 2003;22(3):134-48.
5. AIHW. MyHospitals 2017 [Available from: <http://www.myhospitals.gov.au/>].
6. Healthscope Hospitals. MyHealthscope - Accreditation, quality & safety 2017 [Available from: <http://www.healthscopehospitals.com.au/quality/my-healthscope/>].
7. Victoria State Government. Victorian Health Services Performance 2016 [Available from: <http://performance.health.vic.gov.au/Home.aspx>].
8. Marshall MN, Shekelle P, Leatherman S, Brook R. The public release of performance data: What do we expect to gain? A review of the evidence. *JAMA*. 2000;283(14):1866-74.
9. Fung CH, Lim Y-W, Mattke S, Damberg C, Shekelle PG. Systematic review: the evidence that publishing patient care performance data improves quality of care. *Annals of Internal Medicine*. 2008;148(2):111-23.
10. Chen J. Public reporting of health system performance: a rapid review of evidence on impact on patients, providers and healthcare organisations. *Evidence Check*. 2010.
11. Trigg L. Patients' opinions of health care providers for supporting choice and quality improvement. *Journal of Health Services Research & Policy*. 2011;16(2):102-7.
12. Schneider EC, Epstein AM. Use of public performance reports: a survey of patients undergoing cardiac surgery. *JAMA*. 1998;279(20):1638-42.
13. Abraham J, Sick B, Anderson J, Berg A, Dehmer C, Tufano A. Selecting a provider: what factors influence patients' decision making? *Journal of Healthcare Management*. 2011;56(2):99-116.
14. de Groot IB, Otten W, Smeets HJ, Marang-van de Mheen PJ. Is the impact of hospital performance data greater in patients who have compared hospitals? *BMC Health Services Research*. 2011;11(1):214.
15. Lako C, Dortant H. Why don't the Dutch use quality information in their hospital choice? Results from a survey among 479 patients from a Dutch hospital. *Health*. 2014;6(1):1-5.
16. Hibbard JH, Greene J, Daniel D. What is quality anyway? Performance reports that clearly communicate to consumers the meaning of quality of care. *Medical Care Research and Review*. 2010;67(3):275-93.
17. Lako CJ, Rosenau P. Demand-driven care and hospital choice. Dutch health policy toward demand-driven care: results from a survey into hospital choice. *Health Care Analysis*. 2009;17(1):20.
18. Berendsen AJ, de Jong GM, Schuling J, Bosveld HE, de Waal MW, Mitchell GK, et al. Patient's need for choice and information across the interface between primary and secondary care: a survey. *Patient Education and Counseling*. 2010;79(1):100-5.

19. Cutler H, Gu Y, Olin E. Assessing choice for public hospital patients. Centre for the Health Economy, Macquarie University; 2017.
20. Sheahan M, Little R, Leggat SG. Performance reporting for consumers: issues for the Australian private hospital sector. *Australia and New Zealand Health Policy*. 2007;4(1):5.
21. Australian Government Department of Human Services. Medicare services 2017 [Available from: <https://www.humanservices.gov.au/customer/subjects/medicare-services>].
22. Australian Government Private Health Insurance Ombudsman. What is covered? 2017 [Available from: <http://www.privatehealth.gov.au/healthinsurance/whatiscovered/>].
23. Australian Bureau of Statistics. Health service usage and health related actions, Australia, 2014-15 2017 [Available from: <http://www.abs.gov.au/ausstats/abs@.nsf/mf/4364.0.55.002?OpenDocument>].
24. Canaway R, Bismark M, Dunt D, Kelaher M. Perceived barriers to effective implementation of public reporting of hospital performance data in Australia: a qualitative study. *BMC Health Services Research*. 2017;17(1):391.
25. Canaway R, Bismark M, Dunt D, Kelaher M. Public reporting of hospital performance data: views of senior medical directors in Victoria, Australia. *Australian Health Review*. 2017:-.
26. Canaway R, Bismark M, Dunt D, Kelaher M. Medical directors' perspectives on strengthening hospital quality and safety. *Journal of Health Organization and Management*. (in press).
27. Peter MacCallum Cancer Centre. About us 2017 [Available from: <https://www.petermac.org/>].
28. Australian Government Department of Health. MBS Online 2017 [Available from: <http://www.mbsonline.gov.au/internet/mbsonline/publishing.nsf/Content/Home>].
29. National Health Performance Authority. Hospital performance: Cancer surgery waiting times in public hospitals in 2012-13. 2014.
30. Australian Bureau of Statistics. Education and work, Australia, May 2017 [Available from: <http://www.abs.gov.au/AUSSTATS/abs@.nsf/Lookup/6227.0Main+Features1May%202017?OpenDocument>].
31. Wilson CT, Woloshin S, Schwartz LM. Choosing where to have major surgery: who makes the decision? *Archives of Surgery*. 2007;142(3):242-6.
32. Hannan EL, Sarrazin MSV, Doran DR, Rosenthal GE. Provider profiling and quality improvement efforts in coronary artery bypass graft surgery: the effect on short-term mortality among Medicare beneficiaries. *Medical Care*. 2003;41(10):1164-72.
33. Bridgewater B, Grayson AD, Brooks N, Grotte G, Fabri BM, Au J, et al. Has the publication of cardiac surgery outcome data been associated with changes in practice in northwest England: an analysis of 25 730 patients undergoing CABG surgery under 30 surgeons over eight years. *Heart*. 2007;93(6):744-8.
34. Burack JH, Impellizzeri P, Homel P, Cunningham JN. Public reporting of surgical mortality: a survey of New York State cardiothoracic surgeons. *The Annals of Thoracic Surgery*. 1999;68(4):1195-200.
35. Narins CR, Dozier AM, Ling FS, Zareba W. The influence of public reporting of outcome data on medical decision making by physicians. *Archives of Internal Medicine*. 2005;165(1):83-7.
36. Canaway R, Bismark MM, Dunt D, Kelaher MA. Public reporting of clinician-level data. *The Medical Journal of Australia*. 2017;207(6):231-2.
37. Neil DA, Clarke S, Oakley JG. Public reporting of individual surgeon performance information: United Kingdom developments and Australian issues. *Medical Journal of Australia*. 2004;181(5):266.
38. Marasco SF, Ibrahim JE, Oakley J. Public disclosure of surgeon-specific report cards: current status of the debate. *ANZ Journal of Surgery*. 2005;75(11):1000-4.
39. Gagliardi A, Lemieux-Charles L, Brown A, Sullivan T, Goel V. Stakeholder preferences for cancer care performance indicators. *International Journal of Health Care Quality Assurance*. 2008;21(2):175-89.

- 1
- 2
- 3 40. Yegian JM, Dardess P, Shannon M, Carman KL. Engaged patients will need comparative
- 4 physician-level quality data and information about their out-of-pocket costs. *Health Affairs*.
- 5 2013;32(2):328-37.
- 6 41. Bureau of Health Information. *Healthcare Observer 2017* [Available from:
- 7 [http://www.bhi.nsw.gov.au/Healthcare\\_Observer/\\_nocache](http://www.bhi.nsw.gov.au/Healthcare_Observer/_nocache).
- 8 42. Queensland Government. *Hospital performance 2016* [Available from:
- 9 <http://www.performance.health.qld.gov.au/hospitalperformance/>.
- 10 43. Government of Western Australia. *Our performance 2017* [Available from:
- 11 <http://ww2.health.wa.gov.au/Our-performance>.
- 12 44. Elliott MN, Lehrman WG, Goldstein EH, Giordano LA, Beckett MK, Cohea CW, et al. Hospital
- 13 survey shows improvements in patient experience. *Health Affairs*. 2010;29(11):2061-7.
- 14 45. Anhang Price R, Elliott MN, Zaslavsky AM, Hays RD, Lehrman WG, Rybowski L, et al.
- 15 Examining the role of patient experience surveys in measuring health care quality. *Medical Care*
- 16 *Research and Review*. 2014;71(5):522-54.
- 17 46. Doyle C, Lennox L, Bell D. A systematic review of evidence on the links between patient
- 18 experience and clinical safety and effectiveness. *BMJ Open*. 2013;3(1).
- 19 47. Freed GL, Allen AR. Variation in outpatient consultant physician fees in Australia by specialty
- 20 and state and territory. *The Medical Journal of Australia*. 2017;206(4):176-80.
- 21 48. Hillis DJ, Watters DA, Malisano L, Bailey N, Rankin D. Variation in the costs of surgery:
- 22 seeking value. *The Medical Journal of Australia*. 2017;206(4):153-4.
- 23 49. OpsCost. Compare hospital prices 2013 [Available from: <http://www.opscost.com/>].
- 24 50. Healthcare Bluebook. Never overpay for healthcare again 2017 [Available from:
- 25 [https://healthcarebluebook.com/page\\_Default.aspx](https://healthcarebluebook.com/page_Default.aspx)].
- 26 51. FairHealth Consumer. Estimate your healthcare expenses 2017 [Available from:
- 27 <https://www.fairhealthconsumer.org/>].
- 28 52. Hibbard JH, Greene J, Sofaer S, Firminger K, Hirsh J. An experiment shows that a well-
- 29 designed report on costs and quality can help consumers choose high-value health care. *Health*
- 30 *affairs*. 2012;31(3):560-8.
- 31 53. Emmert M, Schlesinger M. Hospital quality reporting in the United States: does report card
- 32 design and incorporation of patient narrative comments affect hospital choice? *Health Services*
- 33 *Research*. 2017;52(3):933-58.
- 34 54. Hibbard JH, Sofaer S. *Best practices in public reporting series*. Rockville, MD: Agency for
- 35 *Healthcare Research and Quality*; 2010.
- 36 55. Ketelaar NA, Faber MJ, Elwyn G, Westert GP, Braspenning JC. Comparative performance
- 37 information plays no role in the referral behaviour of GPs. *BMC Family Practice*. 2014;15(1):146.
- 38 56. Doering N, Maarse H. The use of publicly available quality information when choosing a
- 39 hospital or health-care provider: the role of the GP. *Health Expectations*. 2015;18(6):2174-82.
- 40
- 41
- 42
- 43
- 44
- 45
- 46
- 47
- 48
- 49
- 50
- 51
- 52
- 53
- 54
- 55
- 56
- 57
- 58
- 59
- 60

**Table 1 Demographic characteristic of respondents (n=243)**

|                                          | N (%)       |
|------------------------------------------|-------------|
| <b>Cancer Type</b>                       |             |
| <i>Breast</i>                            | 155 (63.8%) |
| <i>Bowel</i>                             | 65 (26.7%)  |
| <i>Lung</i>                              | 23 (9.5%)   |
| <b>Diagnosis period</b>                  |             |
| <i>Less than 12 months</i>               | 176 (72.4%) |
| <i>Between 1 and 5 years ago</i>         | 65 (26.7%)  |
| <i>More than 5 years ago</i>             | 2 (0.8%)    |
| <b>Gender</b>                            |             |
| <i>Male</i>                              | 49 (20.2%)  |
| <i>Female</i>                            | 191 (98.8%) |
| <i>Missing</i>                           | 3 (1.2%)    |
| <b>Age groups</b>                        |             |
| <i>25-34</i>                             | 3 (1.2%)    |
| <i>35-44</i>                             | 13 (5.3%)   |
| <i>45-54</i>                             | 36 (14.8%)  |
| <i>55-64</i>                             | 77 (31.7%)  |
| <i>65-74</i>                             | 73 (30.0%)  |
| <i>75-84</i>                             | 32 (13.2%)  |
| <i>85+</i>                               | 6 (2.5%)    |
| <i>Missing</i>                           | 3 (1.2%)    |
| <b>Country of birth</b>                  |             |
| <i>Australia</i>                         | 186 (76.5%) |
| <i>Others</i>                            | 53 (21.8%)  |
| <i>Missing</i>                           | 4 (1.6%)    |
| <b>Marital status</b>                    |             |
| <i>Single/never married</i>              | 10 (4.1%)   |
| <i>Married/in a defacto relationship</i> | 193 (79.4%) |
| <i>Widowed/divorced/separated</i>        | 37 (15.2%)  |
| <i>Missing</i>                           | 3 (1.2%)    |
| <b>Education</b>                         |             |
| <i>Postgraduate</i>                      | 25 (10.3%)  |
| <i>Bachelor</i>                          | 45 (18.5%)  |
| <i>Diploma/certificate</i>               | 75 (30.9%)  |
| <i>High school</i>                       | 93 (38.3%)  |
| <i>Missing</i>                           | 5 (2.1%)    |
| <b>Employment</b>                        |             |
| <i>Full-time</i>                         | 45 (18.5%)  |
| <i>Part-time/casual</i>                  | 34 (14.0%)  |
| <i>Self-employed</i>                     | 18 (7.4%)   |
| <i>Retired/pensioner/unemployed</i>      | 124 (51.0%) |
| <i>Other*</i>                            | 18 (7.4%)   |

|                                              |             |
|----------------------------------------------|-------------|
| Missing                                      | 4 (1.6%)    |
| <b>Occupation (limited to those working)</b> |             |
| Manager                                      | 22 (22.7%)  |
| Professional                                 | 39 (40.2%)  |
| Technician or trades worker                  | 4 (4.1%)    |
| Community of personal service worker         | 3 (3.1%)    |
| Clerical or administrative worker            | 15 (15.5%)  |
| Sales worker                                 | 0 (0.0%)    |
| Machinery operator or driver                 | 0 (0.0%)    |
| Labourer                                     | 0 (0.0%)    |
| Never worked for a wage                      | 0 (0.0%)    |
| Other                                        | 13 (13.4%)  |
| Missing                                      | 1 (1.0%)    |
| <b>Household income</b>                      |             |
| Less than \$25,000                           | 22 (9.1%)   |
| \$25,000 to \$49,999                         | 51 (21.0%)  |
| \$50,000 to \$99,999                         | 69 (28.4%)  |
| \$100,000 or more                            | 51 (21.0%)  |
| Prefer not to stay                           | 36 (14.8%)  |
| Missing                                      | 14 (5.8%)   |
| <b>Health care benefits</b>                  |             |
| Yes                                          | 107 (44.0%) |
| No                                           | 134 (55.1%) |
| Missing                                      | 2 (0.8%)    |
| <b>Private health insurance</b>              |             |
| Yes                                          | 235 (96.7%) |
| Hospital cover only                          | 28 (11.9%)  |
| Extra's cover only                           | 1 (0.4%)    |
| Hospital and extras cover                    | 206 (87.7%) |
| No                                           | 5 (2.1%)    |
| Missing                                      | 3 (1.2%)    |

\*others include those who are currently not working due to their illness and home duties.

**Table 2 Factors influencing hospital choice\***

|                                    | N (%)       |
|------------------------------------|-------------|
| Specialist                         | 218 (89.7%) |
| Distance of the hospital from home | 57 (23.5%)  |
| Reputation of the hospital         | 57 (23.5%)  |
| Own experience                     | 44 (18.1%)  |
| General practitioners              | 42 (17.3%)  |
| Length of waiting list             | 37 (15.2%)  |
| Health insurer provider            | 20 (8.2%)   |
| Family members/friends             | 22 (9.1%)   |



|                                              |           |
|----------------------------------------------|-----------|
| Hospital catchment area                      | 17 (7.0%) |
| Size of the hospital                         | 4 (1.6%)  |
| Hospital/other website                       | 3 (1.2%)  |
| <b>Performance reporting website</b>         | 0 (0.0%)  |
| Booklet/leaflet or someone else at GP clinic | 0 (0.0%)  |

\*total does not reflect 100% as patients could select multiple factors

**Table 3 Barriers affecting the use of PPR information\***

|                                   | N (%)       |
|-----------------------------------|-------------|
| Not aware                         | 179 (73.7%) |
| Not relevant                      | 26 (10.7%)  |
| Results about own condition       | 23 (9.5%)   |
| Accuracy of the information       | 8 (3.3%)    |
| No internet access                | 7 (2.9%)    |
| Too difficult to understand       | 3 (1.2%)    |
| It was out of date                | 2 (0.8%)    |
| Unsure how to use the information | 0 (0.0%)    |

\*total does not reflect 100% as patients could select multiple factors

**Table 4 Preferred types of PPR information\***

|                                   | N (%)       |
|-----------------------------------|-------------|
| Costs of surgery                  | 144 (59.3%) |
| Complications rates               | 141 (58.0%) |
| Successful recovery               | 138 (56.8%) |
| Patient's experience/satisfaction | 132 (54.3%) |
| Medical errors                    | 110 (45.3%) |
| Waiting times                     | 109 (44.9%) |
| Readmission rates                 | 91 (37.4%)  |
| Mortality rates                   | 72 (29.6%)  |
| Length of stay                    | 45 (18.5%)  |

\*total does not reflect 100% as patients could select multiple factors

STROBE Statement—Checklist of items that should be included in reports of *cross-sectional studies*

|                              | Item No | Recommendation                                                                                                                                                                                                                                                                                                                                                                                                                             |
|------------------------------|---------|--------------------------------------------------------------------------------------------------------------------------------------------------------------------------------------------------------------------------------------------------------------------------------------------------------------------------------------------------------------------------------------------------------------------------------------------|
| <b>Title and abstract</b>    | 1       | (a) Indicate the study's design with a commonly used term in the title or the abstract <a href="#">p.2</a><br>(b) Provide in the abstract an informative and balanced summary of what was done and what was found <a href="#">p.2</a>                                                                                                                                                                                                      |
| <b>Introduction</b>          |         |                                                                                                                                                                                                                                                                                                                                                                                                                                            |
| Background/rationale         | 2       | Explain the scientific background and rationale for the investigation being reported <a href="#">pp.4-5</a>                                                                                                                                                                                                                                                                                                                                |
| Objectives                   | 3       | State specific objectives, including any prespecified hypotheses <a href="#">p.5</a>                                                                                                                                                                                                                                                                                                                                                       |
| <b>Methods</b>               |         |                                                                                                                                                                                                                                                                                                                                                                                                                                            |
| Study design                 | 4       | Present key elements of study design early in the paper <a href="#">p.6</a>                                                                                                                                                                                                                                                                                                                                                                |
| Setting                      | 5       | Describe the setting, locations, and relevant dates, including periods of recruitment, exposure, follow-up, and data collection <a href="#">p.7</a>                                                                                                                                                                                                                                                                                        |
| Participants                 | 6       | (a) Give the eligibility criteria, and the sources and methods of selection of participants <a href="#">p.7</a>                                                                                                                                                                                                                                                                                                                            |
| Variables                    | 7       | Clearly define all outcomes, exposures, predictors, potential confounders, and effect modifiers. Give diagnostic criteria, if applicable <a href="#">p.6</a>                                                                                                                                                                                                                                                                               |
| Data sources/<br>measurement | 8*      | For each variable of interest, give sources of data and details of methods of assessment (measurement). Describe comparability of assessment methods if there is more than one group <a href="#">p.6</a>                                                                                                                                                                                                                                   |
| Bias                         | 9       | Describe any efforts to address potential sources of bias <a href="#">NA</a>                                                                                                                                                                                                                                                                                                                                                               |
| Study size                   | 10      | Explain how the study size was arrived at <a href="#">p.7</a>                                                                                                                                                                                                                                                                                                                                                                              |
| Quantitative variables       | 11      | Explain how quantitative variables were handled in the analyses. If applicable, describe which groupings were chosen and why                                                                                                                                                                                                                                                                                                               |
| Statistical methods          | 12      | (a) Describe all statistical methods, including those used to control for confounding <a href="#">p.8</a><br>(b) Describe any methods used to examine subgroups and interactions <a href="#">NA</a><br>(c) Explain how missing data were addressed <a href="#">NA</a><br>(d) If applicable, describe analytical methods taking account of sampling strategy <a href="#">NA</a><br>(e) Describe any sensitivity analyses <a href="#">NA</a> |
| <b>Results</b>               |         |                                                                                                                                                                                                                                                                                                                                                                                                                                            |
| Participants                 | 13*     | (a) Report numbers of individuals at each stage of study—eg numbers potentially eligible, examined for eligibility, confirmed eligible, included in the study, completing follow-up, and analysed <a href="#">p.8</a><br>(b) Give reasons for non-participation at each stage <a href="#">p.8</a><br>(c) Consider use of a flow diagram <a href="#">NA</a>                                                                                 |
| Descriptive data             | 14*     | (a) Give characteristics of study participants (eg demographic, clinical, social) and information on exposures and potential confounders <a href="#">p.8</a><br>(b) Indicate number of participants with missing data for each variable of interest <a href="#">p.21 (Table 1)</a>                                                                                                                                                         |
| Outcome data                 | 15*     | Report numbers of outcome events or summary measures <a href="#">pp.9-10 (in text). and pp.21-23 (Tables 1, 2,3 and 4)</a>                                                                                                                                                                                                                                                                                                                 |
| Main results                 | 16      | (a) Give unadjusted estimates and, if applicable, confounder-adjusted estimates and their precision (eg, 95% confidence interval). Make clear which confounders were                                                                                                                                                                                                                                                                       |

|                          |    |                                                                                                                                                                                            |
|--------------------------|----|--------------------------------------------------------------------------------------------------------------------------------------------------------------------------------------------|
|                          |    | adjusted for and why they were included <b>NA</b>                                                                                                                                          |
|                          |    | (b) Report category boundaries when continuous variables were categorized <b>NA</b>                                                                                                        |
|                          |    | (c) If relevant, consider translating estimates of relative risk into absolute risk for a meaningful time period <b>NA</b>                                                                 |
| Other analyses           | 17 | Report other analyses done—eg analyses of subgroups and interactions, and sensitivity analyses <b>NA</b>                                                                                   |
| <b>Discussion</b>        |    |                                                                                                                                                                                            |
| Key results              | 18 | Summarise key results with reference to study objectives <b>pp.13-15</b>                                                                                                                   |
| Limitations              | 19 | Discuss limitations of the study, taking into account sources of potential bias or imprecision. Discuss both direction and magnitude of any potential bias <b>p.16</b>                     |
| Interpretation           | 20 | Give a cautious overall interpretation of results considering objectives, limitations, multiplicity of analyses, results from similar studies, and other relevant evidence <b>pp.13-16</b> |
| Generalisability         | 21 | Discuss the generalisability (external validity) of the study results <b>p.16</b>                                                                                                          |
| <b>Other information</b> |    |                                                                                                                                                                                            |
| Funding                  | 22 | Give the source of funding and the role of the funders for the present study and, if applicable, for the original study on which the present article is based <b>p.17</b>                  |

\*Give information separately for exposed and unexposed groups.

**Note:** An Explanation and Elaboration article discusses each checklist item and gives methodological background and published examples of transparent reporting. The STROBE checklist is best used in conjunction with this article (freely available on the Web sites of PLoS Medicine at <http://www.plosmedicine.org/>, Annals of Internal Medicine at <http://www.annals.org/>, and Epidemiology at <http://www.epidem.com/>). Information on the STROBE Initiative is available at [www.strobe-statement.org](http://www.strobe-statement.org).

# BMJ Open

## Public performance reporting and hospital choice: A cross-sectional study of patients undergoing cancer surgery in the Australian private healthcare sector

|                                 |                                                                                                                                                                                                                                                                                                                                                                                                                                                                                                        |
|---------------------------------|--------------------------------------------------------------------------------------------------------------------------------------------------------------------------------------------------------------------------------------------------------------------------------------------------------------------------------------------------------------------------------------------------------------------------------------------------------------------------------------------------------|
| Journal:                        | <i>BMJ Open</i>                                                                                                                                                                                                                                                                                                                                                                                                                                                                                        |
| Manuscript ID                   | bmjopen-2017-020644.R1                                                                                                                                                                                                                                                                                                                                                                                                                                                                                 |
| Article Type:                   | Research                                                                                                                                                                                                                                                                                                                                                                                                                                                                                               |
| Date Submitted by the Author:   | 07-Feb-2018                                                                                                                                                                                                                                                                                                                                                                                                                                                                                            |
| Complete List of Authors:       | Prang, Khic-Houy; The University of Melbourne, Centre for Health Policy<br>Canaway, Rachel; The University of Melbourne, Centre for Health Policy<br>Bismark, Marie; The University of Melbourne, Centre for Health Policy<br>Dunt, David; The University of Melbourne, Centre for Health Policy<br>Miller, Julie; Royal Melbourne Hospital, Endocrine Surgery Unit; The<br>University of Melbourne, Department of Surgery<br>Kelaher, Margaret; The University of Melbourne, Centre for Health Policy |
| <b>Primary Subject Heading</b>: | Health policy                                                                                                                                                                                                                                                                                                                                                                                                                                                                                          |
| Secondary Subject Heading:      | Public health                                                                                                                                                                                                                                                                                                                                                                                                                                                                                          |
| Keywords:                       | public performance reporting, hospital choice, quality information, cancer, questionnaire                                                                                                                                                                                                                                                                                                                                                                                                              |
|                                 |                                                                                                                                                                                                                                                                                                                                                                                                                                                                                                        |

SCHOLARONE™  
Manuscripts

Only

1  
2  
3 Public performance reporting and hospital choice: A cross-sectional study of patients undergoing  
4  
5 cancer surgery in the Australian private healthcare sector  
6

7 Khic-Houy Prang<sup>1\*</sup>, Rachel Canaway<sup>1</sup>, Marie Bismark<sup>1</sup>, David Dunt<sup>1</sup>, Julie A. Miller<sup>2,3</sup> and Margaret  
8  
9 Kelaher<sup>1</sup>  
10  
11  
12  
13

14  
15 <sup>1</sup> Centre for Health Policy, Melbourne School of Population and Global Health, The University of  
16  
17 Melbourne, Victoria Australia  
18

19 <sup>2</sup> Endocrine Surgery Unit, The Royal Melbourne Hospital, Victoria Australia  
20

21 <sup>3</sup> Department of Surgery, Melbourne Medical School, The University of Melbourne, Victoria Australia  
22  
23  
24  
25  
26

27 \* Corresponding Author: Khic-Houy Prang  
28

29 Phone: +61 3 90358778  
30

31 Email: [khic-houy.prang@unimelb.edu.au](mailto:khic-houy.prang@unimelb.edu.au)  
32  
33  
34  
35  
36  
37  
38  
39  
40  
41  
42  
43  
44  
45  
46  
47  
48  
49  
50  
51  
52  
53  
54  
55  
56  
57  
58  
59  
60

## Abstract

**Objectives** National mandatory public performance reporting (PPR) for Australian public hospitals, including measures of cancer waiting times, was introduced in 2011. PPR is voluntary for private hospitals. The aims of this study were to assess whether PPR of hospital data is used by patients with breast, bowel or lung cancer when selecting a hospital for elective surgery and how PPR could be improved to meet their information needs.

**Design** A national cross-sectional postal questionnaire.

**Setting** Australian private healthcare sector.

**Participants** Private patients with breast, bowel or lung cancer who attended a public or private hospital for elective surgery (n=243) in 2016.

**Outcome measures** Patients' choice of hospital, use of PPR information and preferred areas of PPR information. Descriptive and conventional qualitative content analyses were conducted.

**Results** Most respondents (94%) attended a private hospital. Almost half could choose a hospital. Choice of hospital was not influenced by PPR data (92% unaware) but by their specialist (90%). Respondents considered PPR to be important (70%) but did not want to see the information, preferring their general practitioners (GPs) to tell them about it (40%). Respondents considered costs of surgery (59%), complications (58%) and success rates (57%) to be important areas of information that should be publicly reported. Almost half suggested that quality indicators be reported at the individual clinician level. Analysis of the open-ended questions identified four themes: 1) decision-making factors; 2) data credibility; 3) unmet information needs; and 4) unintended consequences.

**Conclusions** PPR of hospital data had no substantial impact on patients' choice of hospital. Nonetheless, many respondents expressed interest in using it in the future. To increase PPR awareness and usability, personalised and integrated information on cost and quality of hospitals is

1  
2  
3 required. Dissemination of PPR information via specialists and GPs could assist patients in  
4  
5 interpreting the data and support decision-making.  
6  
7

### 8 **Strengths and limitations of the study**

9

- 10
- 11 • There have been very few studies on the impacts of PPR on consumers' choice of hospitals in  
12 the private healthcare sector since the introduction of national mandatory PPR of public  
13 hospital data in Australia.  
14  
15
  - 16 • This study used a national cross-sectional questionnaire in the private healthcare sector to  
17 assess the use of PPR of hospital data by patients with breast, bowel or lung cancer to  
18 inform hospital choice.  
19  
20
  - 21 • Given the growing prevalence of PPR data being disseminated through the internet, this  
22 study provided further insights into the level of demands for PPR and preferred areas of PPR  
23 information.  
24  
25
  - 26 • The results are not generalisable to other cancer elective surgeries, younger patients and  
27 public hospitals because of the non-population representative characteristics of respondents  
28 (older women who used private hospitals).  
29  
30  
31  
32  
33  
34  
35  
36  
37  
38  
39  
40  
41  
42  
43  
44  
45  
46  
47  
48  
49  
50  
51  
52  
53  
54  
55  
56  
57  
58  
59  
60

## Introduction

There are growing efforts within healthcare systems internationally to measure and publicly disseminate healthcare providers' (i.e. hospitals and clinicians) performance data for greater transparency, to increase accountability and to improve quality of care [1, 2]. Public performance reporting (PPR) of healthcare providers' data is aimed at improving the quality of care by guiding consumers to select high quality providers over low quality providers. It aims to stimulate quality improvement among providers by identifying areas in which they underperform. These pathways are interconnected by providers' motivation to maintain or increase market share [3].

In many countries, such as the United States (US) and the United Kingdom (UK), PPR of hospital and individual clinician's performance data has been a central feature of government health policy [4]. In Australia, national mandatory PPR of public hospital data was introduced in 2011. All public hospitals are required to provide data to the Australian Institute of Health and Welfare (AIHW) which is then reported via the MyHospitals website [5]. Quality indicators reported on the MyHospitals website are underpinned by the Performance and Accountability Framework. The framework identifies 48 indicators, of which 17 are hospital indicators and 31 are primary healthcare indicators. Hospital indicators publicly reported include hand hygiene, staphylococcus aureus infections, time patients spent in emergency department, cancer surgery waiting times and financial performance of public hospitals. Indicators yet to be publicly reported, due to their associated methodological issues, include measures of mortality, unplanned readmission rates, patient experiences and access to services by type of service compared to need.

PPR on the MyHospitals website is voluntary for private hospitals. In 2015-16, there were 630 private hospitals in Australia [6] and 36% voluntarily participate on the MyHospitals website but they do not necessarily report on all the quality indicators that public hospitals do [5]. Large private healthcare providers (e.g. Healthscope with 46 hospitals [7] and Ramsay Health Care with 73 hospitals [8]) publish their own PPR websites to help patients make informed decisions. Most



1  
2  
3 states/territory government also have their own PPR websites (e.g. the Victorian Health Services  
4 Performance [9] and New South Wales Bureau of Health Information [10]). Quality indicators varies  
5 across MyHospitals, private healthcare providers and states/territory government websites.  
6  
7 Examples of additional quality indicators reported on the private healthcare providers and  
8 states/territory government websites but not on the MyHospitals website include patient  
9 experiences, Apgar scores for babies (assessment of a baby's wellbeing after birth), patient falls,  
10 pressure injuries and rehabilitation outcomes.  
11  
12  
13  
14  
15  
16  
17

18  
19 Prior research indicates that PPR changes healthcare providers' behaviour but has limited  
20 impact on consumers' healthcare decision-making [11-13]. Previous research also suggests that  
21 consumers want more choice over their healthcare [14]. However, results from questionnaires  
22 conducted in the US and the Netherlands showed that most consumers do not use or barely use PPR  
23 information when selecting a specialist or a hospital [15-18]. This may be because consumers are not  
24 aware of PPR information, they do not have access to it and they do not understand or trust it [11,  
25 18, 19]. Instead, consumers rely on various sources of information to make an informed hospital  
26 choice including: advice from their general practitioner (GP); their previous experience; family and  
27 friends' experiences; the reputation of the hospital; and the distance of the hospital from their home  
28 [16, 17, 20, 21].  
29  
30  
31  
32  
33  
34  
35  
36  
37  
38  
39

40  
41 Given the recent introduction of PPR in Australia, there have been few studies on the  
42 impacts of PPR on Australian consumers' choice of hospitals [22], particularly in the private  
43 healthcare sector [23]. The focus was on patients with access to private healthcare undergoing  
44 cancer elective surgery because choice of hospital is likely to be possible and cancer waiting times  
45 are publicly reported for all public and some private hospitals [5]. It should be noted that most  
46 surgery for cancer is categorised as 'elective' as it falls outside 'emergency' surgery. Elective surgery  
47 does not imply non-essential or cosmetic surgery. It is surgery that is considered necessary following  
48 a medical assessment of the patient but admission can be delayed for at least 24 hours. Public  
49  
50  
51  
52  
53  
54  
55  
56  
57  
58  
59  
60

1  
2  
3 patients are then place on a hospital waiting list for planned surgery, with recommended maximum  
4  
5 wait times classified as urgent (within 30 days), semi-urgent (within 90 days) or non-urgent [5]. In  
6  
7 the private sector, patients can usually access elective surgery more quickly than in the public sector,  
8  
9 especially for semi-urgent or non-urgent cases. Better understanding of factors that influence  
10  
11 hospital choice, including PPR information, can help explain consumers' decision making processes  
12  
13 and inform policy-makers whether greater resources should be allocated to PPR. Therefore, the  
14  
15 present study aimed to assess whether PPR of hospital data was used by patients with breast, bowel  
16  
17 or lung cancer to inform hospital choice; factors that influence their hospital choice; the level of  
18  
19 demands for PPR; barriers to using PPR; and how PPR could be improved to meet their information  
20  
21 needs.  
22

## 23 24 **Methods**

### 25 26 *Australian healthcare system*

27  
28  
29  
30 Australia has a universal publicly funded health insurance scheme (Medicare) which provides  
31  
32 free access to public hospitals [24]. Private healthcare insurance is also available and encouraged by  
33  
34 government policy (i.e. high income earners receive a tax penalty for not purchasing, and middle  
35  
36 income earners receive a private health cover rebate) [25]. In 2014-15, there were 10.1 million  
37  
38 (57.1%) Australian adults with private healthcare insurance [26]. Private patients can choose to be  
39  
40 treated in either public or private hospitals. To access public or private hospital for non-emergency  
41  
42 care, patients must be referred by their GPs. Issues of payments for private hospitals are generally  
43  
44 discussed during the consultations [27]. Medicare covers 75% of the Medicare Benefits Schedule  
45  
46 (MBS) fee for private patients. The remaining 25% is paid entirely by their private healthcare  
47  
48 insurance, co-paid with their private healthcare insurance, or self-funded if the patient does not  
49  
50 have private healthcare insurance. Private patients can exercise greater choice of specialist, hospital  
51  
52 and timing of procedures than public patients.  
53  
54  
55  
56  
57  
58  
59  
60

### *Study design*

This study is part of a larger research program which aims to improve understanding of how PPR might improve quality of care in public and private hospitals in Australia by examining the perspectives of multiple stakeholders. Previous components of the research program include interviews with healthcare consumer advocates, providers, purchasers (public and private funders of healthcare services) [28], senior hospital clinical administrators [29, 30] and general practitioners (forthcoming). This component of the research program uses a quantitative approach to understand the use of PPR information when selecting a hospital for surgery among patients with breast, bowel or lung cancer. A national cross-sectional study design of the private healthcare sector was conducted using postal questionnaires.

### *Questionnaire design*

We developed a short questionnaire with four sections: 1) cancer type; 2) hospital stay; 3) hospital choice; and 4) about you (Appendix A). The first section included two questions about the type of cancer the participants had, period of diagnosis, and confirmation of undergoing cancer surgical treatments between 1<sup>st</sup> January and 31<sup>st</sup> December 2016. The second section included two questions about the type of hospital they attended (i.e. public or private hospital) and their status (public or private patient). The third section included 10 questions about factors influencing their hospital choice, the awareness and use of the available PPR information, preferred areas of PPR information (i.e. quality and performance indicators), level of data presentation, the importance of PPR information and barriers to using PPR information. This section included two additional open-ended questions about any concerns or experiences of PPR they would like to share. The final section included demographic characteristics such as gender, age, marital status, education, employment status, occupation, income and health care insurance status. The questionnaire was piloted with a consumer group from Peter MacCallum Cancer Centre in Victoria [31] to identify ambiguities or difficult questions and to ensure that the questionnaire could be completed in a

1  
2  
3 timely manner. The consumer group included five women aged between 35-45 years. Four women  
4  
5 previously had cancer, including three in the last 12 months. The questionnaire was revised in  
6  
7 response to the comments received from the consumer group.  
8  
9

### 10 *Sample*

11  
12 Participants were identified and contacted by the Australian Government Department of  
13  
14 Human Services (DHS) through their MBS records (including procedure codes). Eligibility criteria  
15  
16 included: participants aged 18 years and over; diagnosed with breast, bowel or lung cancer; and  
17  
18 attended an Australian hospital for cancer surgical treatments between 1<sup>st</sup> January and 31<sup>st</sup>  
19  
20 December 2016. MBS is a list of Medicare services subsidised by the Australian government [32].  
21  
22 Therefore, the sample included only those who made a Medicare claim (i.e. private patients in public  
23  
24 or private hospital). Patients who did not make a Medicare claim (i.e. public patients in public  
25  
26 hospital in which there are no costs to the patients) are not included. Their records are managed by  
27  
28 the individual state governments. The selection of the appropriate MBS procedure codes (Appendix  
29  
30 B) was done by the researchers in consultation with a surgeon who specialises in cancer care. In  
31  
32 total, 29,793 eligible participants were identified (52% with breast cancer, 32% with bowel cancer  
33  
34 and 16% with lung cancer). A stratified sampling by cancer type was performed for 1,000 eligible  
35  
36 participants. Samples within each stratum were selected with simple random sampling.  
37  
38  
39  
40

### 41 *Data collection*

42  
43 The postal questionnaire was open between April and July 2017. Study invitations were  
44  
45 mailed out to a random sample of 1,000 eligible participants by the Australia Government DHS. A  
46  
47 sample size calculation for cross-sectional study was conducted [33]. The confidence level was set at  
48  
49 90% with a 5% margin of error. The estimate proportion of the population who used PPR when  
50  
51 selecting a hospital was set at 0.4. The required sample size is 261 participants. The expected  
52  
53 response rates of previous research conducted by the Centre were approximately 20-30%.  
54  
55  
56  
57  
58  
59  
60

1  
2  
3 Researchers were not provided with contact details of the selected sample. Study invitations  
4 included a cover letter from the DHS, a plain language explanation of the study, the questionnaire  
5 and a reply-paid envelope addressed to the researchers. Each participant received a \$10 e-gift card  
6 as reimbursement for their time if they included an email address with their return questionnaire.  
7  
8  
9

### 10 11 12 *Data analysis*

13  
14  
15 Descriptive analyses of the closed-ended questions were conducted using the Statistical Package for  
16 the Social Sciences (SPSS) version 23. A conventional qualitative content analyses of the two open-  
17 ended questions were conducted using NVivo version 11. A conventional qualitative content analysis  
18 aims to interpret meaning from the content of text data without using preconceived categories [34].  
19  
20  
21 Codes were derived directly from the text data and then grouped into categories that represent  
22 similar meanings.  
23  
24  
25  
26

### 27 28 *Ethical considerations*

29  
30  
31 Ethical approval for this study was granted by the Melbourne School of Population and  
32 Global Health Human Ethics Advisory Group, The University of Melbourne. The return of the  
33 questionnaire was taken as an indication of voluntary consent to participate.  
34  
35  
36  
37

## 38 **Results**

### 39 40 41 *Sample characteristics*

42  
43  
44 In total, 243 participants completed the questionnaire (24.3% response rate). Compared to  
45 respondents, non-respondents were more likely to be male and younger. The sample was somewhat  
46 representative of the Australian population who had cancer elective surgery. Patients with breast  
47 (64% vs. 58%) and lung cancer (9% vs. 7%) were slightly over-represented whereas patients with  
48 bowel cancer were under-represented (27% vs 35%) [35].  
49  
50  
51  
52  
53  
54  
55  
56  
57  
58  
59  
60

1  
2  
3 The characteristics of the respondents are described in Table 1. Over 60% of respondents  
4  
5 were diagnosed with breast cancer, 27% with bowel and 10% with lung cancer, with the majority  
6  
7 diagnosed in the last 12 months (70%). Almost all the respondents were women (79%) aged  
8  
9 between 55 and 74 years (62%). The majority were born in Australia (77%) and spoke English (95%).  
10  
11 The majority were married/in a defacto relationship (79%). Almost 30% had a  
12  
13 bachelor/postgraduate degree, a slight under-representation of the Australian women population  
14  
15 with a bachelor degree or higher [36]. Half of the respondents were pensioners/retirees and 40%  
16  
17 were employed. Of those employed, over 60% worked in a professional or managerial position. Over  
18  
19 half had a household income of less than \$99,999. The median annual gross household income in  
20  
21 Australia for the 2015-16 period was \$84,032 [37]. Fewer than half (44%) had healthcare benefits  
22  
23 (e.g. healthcare card which entitles access to cheaper prescription medicines). Almost all  
24  
25 respondents (97%) had private health insurance, which usually covered both hospital treatment and  
26  
27 extras such as outpatient physiotherapy (88%).  
28  
29

### 30 31 *Hospital stay and choice*

32  
33  
34 Respondents self-reported that 94% attended a private hospital and 6% attended a public  
35  
36 hospital for cancer surgery. Among those who attended a public hospital, 87% were private patients  
37  
38 and 13% were public patients. The small proportion of public patients in the sample may suggest  
39  
40 that some of the care provided involved a private component (e.g. certain diagnostic imaging and  
41  
42 pathology services are not fully covered by Medicare [38]). Alternatively, this could have been a  
43  
44 clerical error in the MBS records. Costs of private hospitals were reportedly covered partly by the  
45  
46 respondents and their health insurance (49%) or fully covered by their health insurance (47%). Three  
47  
48 percent of respondents self-funded their treatments. Almost half (48%) of the respondents attended  
49  
50 their preferred hospital, 28% did not have a choice in hospital, and 25% did not have a hospital  
51  
52 preference. Of those who did not have a choice of hospital, 37% would have liked to have had a  
53  
54 choice.  
55  
56  
57  
58  
59  
60

### *Awareness and use of PPR information*

Ninety-two percent of respondents reported no awareness of PPR information. Of those who were aware of it, 88% did not use it when selecting a hospital and 56% considered PPR to be of little or no importance to inform their choice of hospital. Reasons cited for not using PPR information included limited choice of hospital, as well as prior experience with certain hospitals, and trust in the advice of their doctor: *"We only have a private and public hospital where I live, so choice was limited regardless of the information provided"; "I was too sick to do any research at the time. I took advice from my specialist"*.

### *Factors influencing hospital choice*

Table 2 presents the factors that influenced the choice of hospital. PPR data did not influence choice of hospital. The most common factors that impacted hospital selection were specialists (90%), reputation of the hospital (24%), distance to the hospital from home (24%), patients' previous experience (18%), and GPs advice (17%).

### *Barriers affecting the use of PPR*

Table 3 shows the barriers affecting the use of PPR in selecting a hospital. The most common barriers impeding the use of PPR data included lack of PPR awareness (74%), lack of PPR relevance (11%) and interested in PPR for their condition solely (10%).

### *Source of PPR information*

Despite the lack of PPR awareness and barriers to the use of PPR, overall 71% of respondents considered PPR to be very important or important to inform their choice or family members' future choice of hospital. However, most respondents did not want to access PPR information themselves, preferring their GPs or other healthcare providers to tell them about it (40%). Other preferred sources of PPR information included websites (35%), printed

1  
2  
3 books/directories (10%) and mobile phone applications (3%). A small proportion of respondents did  
4  
5 not want any PPR information (9%).

#### 6 7 8 *Preferred types of PPR information*

9  
10 Table 4 shows the types of PPR information that respondents most wanted access to.  
11  
12 Respondents considered costs of surgery (59%), complications (58%) and success rates (57%)  
13  
14 important areas to report on. Respondents reported that they preferred PPR information to be  
15  
16 reported at the individual clinician level (48%), followed by hospitals (31%) and specific clinical units  
17  
18 within hospitals (18%).

#### 19 20 21 22 *Additional comments and concerns related to PPR*

23  
24  
25 Almost half of the respondents (48%) provided information in response to one or both open-  
26  
27 ended questions. Analysis of their responses revealed four themes: 1) decision-making factors; 2)  
28  
29 data credibility; 3) unmet information needs; and 4) unintended consequences. Themes two, three  
30  
31 and four provided further insights into PPR of hospital data which were not captured in the  
32  
33 quantitative findings.

#### 34 35 36 *1. Decision-making factors*

37  
38  
39 Consistent with the quantitative findings, choice of hospital was determined by advice from  
40  
41 specialists or GPs rather than PPR information. Although respondents perceived PPR to be important  
42  
43 for hospital's accountability and transparency, they reported that their choices were restricted to  
44  
45 the hospital or hospitals where their specialist performed surgery. Other respondents had relied on  
46  
47 their GP's for a specialist recommendation:  
48

49  
50 "I did not check on the hospital. My surgeon was recommended as the 'best' by my GP  
51  
52 who I trust and she could operate quickly and worked out of a specific hospital - no  
53  
54 choice to be made." (Respondent #39)  
55



1  
2  
3 Some respondents preferred their GPs to be informed about PPR information and relay it to  
4 them, or direct them to an appropriate website or other resource to inform their decision.  
5  
6 Additional factors influencing patients' selection of hospital included family and friends.  
7  
8  
9

## 10 2. *Data credibility*

11  
12 Although over 90% of respondents reported not being aware of PPR, they nonetheless  
13 raised concerns with the reliability, validity and timeliness of the data. Some were cynical and  
14 suspicious of the data, questioning its trustworthiness:  
15  
16  
17  
18

19  
20 "The hospitals information accuracy. No hospital is going to let 'issues' out otherwise  
21 loss of patients means loss of money and so it goes. In an ideal world, we could  
22 'believe' the information and make our decisions as consumers with accuracy. I don't  
23 believe the information will truly reflect the real world. I have seen government  
24 departments fudge stuff." (Respondent #200)  
25  
26  
27  
28  
29  
30

31 Some respondents expressed their lack of clarity and concern around who collected the data  
32 (i.e. independent body), how it was collated (i.e. qualifications and experiences of the people, data  
33 quality processes), and why certain areas of information (i.e. quality and performance indicators)  
34 were chosen to be reported.  
35  
36  
37  
38  
39

## 40 3. *Unmet information needs*

41  
42  
43 Respondents reported the following areas of information (currently not available on the  
44 MyHospitals website) to be of interest: patient experiences; hospital cleanliness; food quality;  
45 nursing standards (e.g. bedside manners); and hospital facilities (e.g. available entertainments such  
46 as movie/tablet rentals). However, several respondents worried that reporting patient experiences  
47 may be misleading and damaging to a hospital's reputation if there were no site moderators:  
48  
49  
50  
51  
52  
53  
54  
55  
56  
57  
58  
59  
60

1  
2  
3 “As a patient I am not a medical expert as are other patients. We can comment on the  
4 level of care but not the medical treatment. So, my opinion and that of other patients is  
5 very subjective. Just like 'TripAdvisor' someone could rubbish a hospital with no  
6 medical grounds or expertise.” (Respondent #52)  
7  
8  
9

#### 10 11 12 4. *Unintended consequences* 13

14  
15 Additional PPR concerns raised by respondents included unnecessary stress and increased  
16 pressure on hospital staff because of PPR. Some respondents likened PPR of hospital data to the  
17 education reporting system which compares how a school is performing on the National Assessment  
18 Plan Literacy and Numeracy (NAPLAN) tests with other similar schools. A respondent claimed that  
19 increased focus on reporting in the education sector resulted in poorer education and expressed  
20 concern that PPR of hospital data could similarly lead to a deterioration in the quality of care  
21 provided. Some respondents suggested that the PPR systems need to be design in a way which  
22 minimises administrative burden and is supportive of hospital staff:  
23  
24  
25  
26  
27  
28  
29  
30

31  
32 “It would have to be carefully designed to be fair to all involved without creating  
33 excessive administrative and pressure and hierarchy as sometimes happens in schools  
34 reporting - overly burdensome for staff so counter-productive.” (Respondent #57)  
35  
36  
37  
38

#### 39 40 **Discussion** 41

42  
43 The results of the study, which are reflective of experiences in the private healthcare sector,  
44 highlighted that many respondents did not use PPR information to inform their hospital choice,  
45 mainly because they were not aware of it. This is consistent with previous studies [15-18]. Instead,  
46 as patients, they were guided by their specialists when selecting a hospital. Almost half of the  
47 respondents reported that they did have a choice of hospital, which suggests they were involved in  
48 the decision-making process with their specialists. Others have reached similar conclusion [39].  
49  
50  
51  
52  
53  
54  
55 Although determining how the specialists and patients selected hospitals was not part of this study,  
56  
57  
58  
59  
60

1  
2  
3 the responses to the open-ended questions revealed that the availability of specialists and where  
4 he/she performed the elective surgery generally determined which hospital they attended as  
5 patients. Future research is required to explore the decision-making process between specialists and  
6 patients, and whether the dissemination of PPR information to patients via specialists (as potential  
7 mediators of patient choice) is feasible.  
8  
9  
10  
11  
12

13  
14 The limited awareness of PPR among respondents may be associated with the lack of  
15 mandatory PPR for private hospitals. Over a third of Australian private hospitals voluntarily  
16 participate on the MyHospitals website [5]. Some private healthcare providers (e.g. Healthscope and  
17 Ramsay Health Care) publish their own PPR websites [7, 8]. However, Ramsay Health Care reports  
18 aggregated data on quality indicators for all their private hospitals combined, instead of individual  
19 hospitals, specialists or conditions – this limits its relevance and usability for healthcare consumers.  
20 Recently, Healthscope has launched the MyHealthscope website which allow healthcare consumers  
21 to view and compare the performance of each their hospital against the industry rate. Again, the  
22 results are not stratified by conditions or reported at the individual specialist-level.  
23  
24  
25  
26  
27  
28  
29  
30  
31  
32

33  
34 Almost half of the study respondents proposed that publicly reported hospital-related  
35 information (which includes quality and performance indicators) be reported at the level of  
36 individual specialists. In the US and the UK, ratings of individual specialists working in hospitals are  
37 publicly reported [4]. There is evidence that public reporting of individual specialists' data have led  
38 to improvement in the quality of care [40, 41]. However, unintended consequences such as 'cream  
39 skimming' and 'gaming' (i.e. avoiding treating high risk patients who are likely to have poor  
40 outcomes) have also been reported [42, 43]. In Australia, debates surrounding PPR of individual  
41 specialist-level continues [44-46].  
42  
43  
44  
45  
46  
47  
48  
49  
50

51 Consistent with previous research, we found the following performance indicators to be of  
52 relevance to patients: costs of surgery; complications rates; success rates; patient experiences;  
53 hospital cleanliness; and food quality [47, 48]. None of these quality indicators are currently  
54  
55  
56  
57

1  
2  
3 reported on the MyHospitals website [5]. Patient experience is one of 17 indicators recommended  
4  
5 to be publicly reported on the MyHospitals website. However, methodological issues (i.e. lack of  
6  
7 national comparable information) has prevented its disclosure. In contrast, several states'  
8  
9 performance websites actively report on patient experiences, complications, and standards of  
10  
11 cleaning to various level of details [9, 10, 49, 50]; the Bureau of Health Information in New South  
12  
13 Wales the most thorough and interactive in its web-based reporting [10]. Although some of the  
14  
15 quality indicators collected by the states are similar, there are no consistency on the tools use to  
16  
17 collect the data. For example, the inpatient experiences surveys conducted in Victoria (92 questions)  
18  
19 [51], New South Wales (99 questions) [52] and South Australia (71 questions) [53] are drawn from  
20  
21 various sources including the NHS inpatient survey, the Picker Institute Questionnaire and the  
22  
23 Patient Experience Information Development Working group, state's key performance indicators and  
24  
25 national set of core common patient experience questions. This limits comparison at the national  
26  
27 level but allows hospital comparison within states. In other countries, such as England, The  
28  
29 Netherlands and the US, patient reported experience and outcomes are routinely collected and  
30  
31 available for consumers to view. These measures are found to be positively associated with delivery  
32  
33 of care [54], clinical outcomes [55], clinical effectiveness and patient safety [56].  
34  
35  
36

37  
38 None of the performance websites in Australia describe costs of surgery. There are no costs  
39  
40 associated with attending an Australian public hospital as a public patient. It may not be surprising  
41  
42 then that costs of surgery and associated out-of-pocket costs are not reported. However, knowing  
43  
44 out-of-pocket costs was considered important for patients with private healthcare insurance. Costs  
45  
46 of elective surgery were fully covered by private healthcare insurance in only 47% of cases, with one  
47  
48 respondent commenting that out-of-pocket cost for her breast cancer surgery was \$7,500. In  
49  
50 Australia, there are limited publicly available sources for patients to access information on out-of-  
51  
52 pocket costs for inpatient and outpatient care [57, 58]. The Royal Australasian College of Surgeons in  
53  
54 collaboration with Medibank (an Australian private health insurer), publishes surgical variance  
55  
56 reports which describe average out-of-pocket charges for surgeons and other medical services (i.e.  
57  
58  
59

1  
2  
3 anaesthetist, assistant surgeon and for diagnostics). Their reports were not targeted at consumers  
4 but for specialists, to encourage improvement in private hospital clinical outcomes and patient care.  
5  
6 In the US, report cards and reporting websites (e.g. OpsCost [59], Healthcare Bluebook [60], Fair  
7  
8 Heath consumers [61]) have been developed to help consumers compare hospital quality and cost of  
9  
10 care. Evaluation of report cards with cost information, in an experimental setting, showed that some  
11  
12 employees avoided low-cost providers because they perceived low-cost care as substandard and  
13  
14 higher prices as proxy for higher quality [62]. The authors suggest that including quality indicators  
15  
16 with costs data may improve consumers' decision-making. Given the limited research in this area  
17  
18 and the growth in comparative quality and cost websites, further studies are warranted to evaluate  
19  
20 its accessibility, usefulness and content for consumers.  
21  
22

23  
24 Although many respondents considered PPR to be important for transparency and  
25  
26 accountability, they were sceptical of the reliability and validity of PPR data. The reason for this is  
27  
28 unclear given that most patients were not aware of PPR. Some comments from the open-ended  
29  
30 questions demonstrated lack of understanding of how PPR data was collected, and collated and the  
31  
32 methodologies used to construct the quality indicators. In support, past research suggests that  
33  
34 consumers distrust PPR data because they have difficulties interpreting the information [11, 19, 63].  
35  
36 In the US, consumer-focused best practice guidelines have been developed for presenting,  
37  
38 promoting and disseminating PPR data to improve its comprehensibility and perceived trustworthiness  
39  
40 [48, 64].  
41  
42  
43

44 Patients preferred that the dissemination of PPR information to occur via their GPs. In  
45  
46 Australia, GPs are gatekeepers to secondary care with patients requiring their referral for non-  
47  
48 emergency access. Therefore, GPs are in a good position to help patients interpret PPR data or guide  
49  
50 patients to appropriate resources to support decision-making. However, past research shows that  
51  
52 GPs rarely used PPR information when referring patients to hospitals because they are unaware of  
53  
54  
55  
56  
57  
58  
59  
60

1  
2  
3 PPR data and they were concerns about its reliability and validity [65, 66]. Addressing these barriers  
4  
5 are essential if GPs are to be a viable source of PPR information for their patients.  
6

### 7 8 *Limitations*

9  
10 These findings should be interpreted carefully due to several limitations. Given the non-  
11  
12 population representative characteristics of respondents (older women who used private hospitals),  
13  
14 the results are not generalisable to other cancer elective surgeries, younger patients and public  
15  
16 hospitals. Future research is needed to gather data from a larger sample and to expand this study to  
17  
18 other elective surgeries and public patients in public hospital (could be recruited via the individual  
19  
20 state/territory government which hold their records). Recall bias may have also affected our results,  
21  
22 particularly among elderly patients [67, 68]. However, we attempted to minimise recall bias by  
23  
24 ensuring that only patients who had cancer elective surgery within the last 12 months were eligible  
25  
26 to complete the questionnaire.  
27  
28

### 29 30 *Conclusions*

31  
32 PPR of hospital data appears to have no substantial impact on selection of hospitals among a  
33  
34 randomly selected cohort of Australian patients with breast, bowel or lung cancer who were treated  
35  
36 as private patients. Almost one third of respondents reported no choice of hospital and current PPR  
37  
38 information did not appear to meet their information needs. Nevertheless, a substantial number  
39  
40 of respondents expressed interest in PPR information and claimed that they would use it in their  
41  
42 future decision-making. Given the growing prevalence of performance data being publicly  
43  
44 disseminated through the internet, further efforts are required to develop quality and cost  
45  
46 indicators of interest to patients. While this study focused on people treated for cancer, it has  
47  
48 relevance for all consumers of healthcare. The dissemination of PPR information to patients via  
49  
50 specialists and GPs may enable patients to make clinically and financially informed choices with the  
51  
52 assistance of their medical doctors.  
53  
54  
55  
56  
57  
58  
59  
60

### Contributors

MK, DD and MB conceptualised and designed the study and obtained its funding. KP, RC and MK contributed to the design of the questionnaire. KP, MK and JM selected the sample (MBS procedure codes). KP collected, analysed and interpreted the data and drafted the manuscript. RC, MB, DD, JM and MK contributed to data interpretation and critically reviewed the manuscript. All authors read and approved the final manuscript.

### Funding

This research was funded by Medibank Better Health Foundation. Views expressed are those of the authors and not the funding agency.

### Competing interests

The authors declare that they have no competing interests.

### Data sharing statement

The dataset analysed during the current study are not publicly available due to participants' confidentiality.

### Acknowledgements

We wish to thank Medibank Better Health Foundation for funding this research. Steve Gilbert from the Australian Department of Human Services for the mail out of the questionnaires. Finally, we wish to thank all the participants who took the time to complete the questionnaire.

### References

1. Cacace M, Ettelt S, Brereton L, Pedersen JS, Nolte E. How health systems make available information on service providers: Experience in seven countries. *Rand Health Quarterly*. 2011;1(1):11.

2. Rechel B, McKee M, Haas M, Marchildon GP, Bousquet F, Blümel M, et al. Public reporting on quality, waiting times and patient experience in 11 high-income countries. *Health Policy*. 2016;120(4):377-83.
3. Berwick DM, James B, Coye MJ. Connections between quality measurement and improvement. *Medical Care*. 2003;41(1):I-30-I-8.
4. Marshall MN, Shekelle PG, Davies HT, Smith PC. Public reporting on quality in the United States and the United Kingdom. *Health Affairs*. 2003;22(3):134-48.
5. AIHW. MyHospitals 2017 [Available from: <http://www.myhospitals.gov.au/>].
6. Australian Bureau of Statistics. Private hospitals, Australia, 2015-16 2017 [Available from: <http://www.abs.gov.au/ausstats/abs@.nsf/Lookup/by%20Subject/4390.0~2015-16~Main%20Features~All%20Private%20Hospitals%20-%20summary~2>].
7. Healthscope Hospitals. MyHealthscope - Accreditation, quality & safety 2017 [Available from: <http://www.healthscopehospitals.com.au/quality/my-healthscope>].
8. Ramsay Health Care. Patient safety and quality 2018 [Available from: <http://www.ramsayhealth.com.au/Sustainability/Patient-Quality-and-Safety>].
9. Victoria State Government. Victorian Health Services Performance 2016 [Available from: <http://performance.health.vic.gov.au/Home.aspx>].
10. Bureau of Health Information. Healthcare Observer 2017 [Available from: [http://www.bhi.nsw.gov.au/Healthcare\\_Observer/\\_nocache](http://www.bhi.nsw.gov.au/Healthcare_Observer/_nocache)].
11. Marshall MN, Shekelle P, Leatherman S, Brook R. The public release of performance data: What do we expect to gain? A review of the evidence. *JAMA*. 2000;283(14):1866-74.
12. Fung CH, Lim Y-W, Mattke S, Damberg C, Shekelle PG. Systematic review: the evidence that publishing patient care performance data improves quality of care. *Annals of Internal Medicine*. 2008;148(2):111-23.
13. Chen J. Public reporting of health system performance: a rapid review of evidence on impact on patients, providers and healthcare organisations. *Evidence Check*. 2010.
14. Trigg L. Patients' opinions of health care providers for supporting choice and quality improvement. *Journal of Health Services Research & Policy*. 2011;16(2):102-7.
15. Schneider EC, Epstein AM. Use of public performance reports: a survey of patients undergoing cardiac surgery. *JAMA*. 1998;279(20):1638-42.
16. Abraham J, Sick B, Anderson J, Berg A, Dehmer C, Tufano A. Selecting a provider: what factors influence patients' decision making? *Journal of Healthcare Management*. 2011;56(2):99-116.
17. de Groot IB, Otten W, Smeets HJ, Marang-van de Mheen PJ. Is the impact of hospital performance data greater in patients who have compared hospitals? *BMC Health Services Research*. 2011;11(1):214.
18. Lako C, Dortant H. Why don't the Dutch use quality information in their hospital choice? Results from a survey among 479 patients from a Dutch hospital. *Health*. 2014;6(1):1-5.
19. Hibbard JH, Greene J, Daniel D. What is quality anyway? Performance reports that clearly communicate to consumers the meaning of quality of care. *Medical Care Research and Review*. 2010;67(3):275-93.
20. Lako CJ, Rosenau P. Demand-driven care and hospital choice. Dutch health policy toward demand-driven care: results from a survey into hospital choice. *Health Care Analysis*. 2009;17(1):20.
21. Berendsen AJ, de Jong GM, Schuling J, Bosveld HE, de Waal MW, Mitchell GK, et al. Patient's need for choice and information across the interface between primary and secondary care: a survey. *Patient education and counseling*. 2010;79(1):100-5.
22. Cutler H, Gu Y, Olin E. Assessing choice for public hospital patients. Centre for the Health Economy, Macquarie University; 2017.
23. Sheahan M, Little R, Leggat SG. Performance reporting for consumers: issues for the Australian private hospital sector. *Australia and New Zealand Health Policy*. 2007;4(1):5.
24. Australian Government Department of Human Services. Medicare services 2017 [Available from: <https://www.humanservices.gov.au/customer/subjects/medicare-services>].



- 1  
2  
3 25. Australian Government Private Health Insurance Ombudsman. What is covered? 2017  
4 [Available from: <http://www.privatehealth.gov.au/healthinsurance/whatiscovered/>.  
5 26. Australian Bureau of Statistics. Health service usage and health related actions, Australia,  
6 2014-15 2017 [Available from:  
7 <http://www.abs.gov.au/ausstats/abs@.nsf/mf/4364.0.55.002?OpenDocument>.  
8 27. Victoria State Government. Choosing hospitals and specialist doctors 2017 [Available from:  
9 [https://www.betterhealth.vic.gov.au/health/servicesandsupport/choosing-hospitals-and-specialist-](https://www.betterhealth.vic.gov.au/health/servicesandsupport/choosing-hospitals-and-specialist-doctors)  
10 [doctors](https://www.betterhealth.vic.gov.au/health/servicesandsupport/choosing-hospitals-and-specialist-doctors).  
11 28. Canaway R, Bismark M, Dunt D, Kelaher M. Perceived barriers to effective implementation of  
12 public reporting of hospital performance data in Australia: a qualitative study. BMC Health Services  
13 Research. 2017;17(1):391.  
14 29. Canaway R, Bismark M, Dunt D, Kelaher M. Public reporting of hospital performance data:  
15 views of senior medical directors in Victoria, Australia. Australian Health Review. 2017:-.  
16 30. Canaway R, Bismark M, Dunt D, Kelaher M. Medical directors' perspectives on strengthening  
17 hospital quality and safety. Journal of Health Organization and Management. 2017;31(7-8):696-712.  
18 31. Peter MacCallum Cancer Centre. About us 2017 [Available from:  
19 <https://www.petermac.org/>.  
20 32. Australian Government Department of Health. MBS Online 2017 [Available from:  
21 <http://www.mbsonline.gov.au/internet/mbsonline/publishing.nsf/Content/Home>.  
22 33. Charan J, Biswas T. How to calculate sample size for different study designs in medical  
23 research? Indian Journal of Psychological Medicine. 2013;35(2):121-6.  
24 34. Hsieh H-F, Shannon SE. Three approaches to qualitative content analysis. Qualitative Health  
25 Research. 2005;15(9):1277-88.  
26 35. National Health Performance Authority. Hospital performance: Cancer surgery waiting times  
27 in public hospitals in 2012-13. 2014.  
28 36. Australian Bureau of Statistics. Education and work, Australia, May 2017 [Available from:  
29 [http://www.abs.gov.au/AUSSTATS/abs@.nsf/Lookup/6227.0Main+Features1May%202017?OpenDo](http://www.abs.gov.au/AUSSTATS/abs@.nsf/Lookup/6227.0Main+Features1May%202017?OpenDocument)  
30 [cument](http://www.abs.gov.au/AUSSTATS/abs@.nsf/Lookup/6227.0Main+Features1May%202017?OpenDocument).  
31 37. Australian Bureau of Statistics. Household income and wealth, Australia, 2015-16 2017  
32 [Available from: <http://www.abs.gov.au/ausstats/abs@.nsf/mf/6523.0>.  
33 38. Australian Government Department of Health. MRI (Magnetic Resonance Imaging) Medicare  
34 services fact sheet 2014 [Available from:  
35 <http://www.health.gov.au/internet/main/publishing.nsf/Content/mri-medicare-services-fact-sheet>.  
36 39. Wilson CT, Woloshin S, Schwartz LM. Choosing where to have major surgery: who makes the  
37 decision? Archives of Surgery. 2007;142(3):242-6.  
38 40. Hannan EL, Sarrazin MSV, Doran DR, Rosenthal GE. Provider profiling and quality  
39 improvement efforts in coronary artery bypass graft surgery: the effect on short-term mortality  
40 among Medicare beneficiaries. Medical Care. 2003;41(10):1164-72.  
41 41. Bridgewater B, Grayson AD, Brooks N, Grotte G, Fabri BM, Au J, et al. Has the publication of  
42 cardiac surgery outcome data been associated with changes in practice in northwest England: an  
43 analysis of 25 730 patients undergoing CABG surgery under 30 surgeons over eight years. Heart.  
44 2007;93(6):744-8.  
45 42. Burack JH, Impellizzeri P, Homel P, Cunningham JN. Public reporting of surgical mortality: a  
46 survey of New York State cardiothoracic surgeons. The Annals of Thoracic Surgery. 1999;68(4):1195-  
47 200.  
48 43. Narins CR, Dozier AM, Ling FS, Zareba W. The influence of public reporting of outcome data  
49 on medical decision making by physicians. Archives of Internal Medicine. 2005;165(1):83-7.  
50 44. Canaway R, Bismark MM, Dunt D, Kelaher MA. Public reporting of clinician-level data. The  
51 Medical Journal of Australia. 2017;207(6):231-2.  
52 45. Neil DA, Clarke S, Oakley JG. Public reporting of individual surgeon performance information:  
53 United Kingdom developments and Australian issues. Medical Journal of Australia. 2004;181(5):266.  
54  
55  
56  
57  
58  
59  
60

- 1  
2  
3 46. Marasco SF, Ibrahim JE, Oakley J. Public disclosure of surgeon-specific report cards: current  
4 status of the debate. *ANZ Journal of Surgery*. 2005;75(11):1000-4.
- 5 47. Gagliardi A, Lemieux-Charles L, Brown A, Sullivan T, Goel V. Stakeholder preferences for  
6 cancer care performance indicators. *International Journal of Health Care Quality Assurance*.  
7 2008;21(2):175-89.
- 8 48. Yegian JM, Dardess P, Shannon M, Carman KL. Engaged patients will need comparative  
9 physician-level quality data and information about their out-of-pocket costs. *Health Affairs*.  
10 2013;32(2):328-37.
- 11 49. Queensland Government. Hospital performance 2016 [Available from:  
12 <http://www.performance.health.qld.gov.au/hospitalperformance/>].
- 13 50. Government of Western Australia. Our performance 2017 [Available from:  
14 <http://ww2.health.wa.gov.au/Our-performance>].
- 15 51. Victoria State Government. Victorian healthcare experience survey - VHES 2017 [Available  
16 from: [https://www2.health.vic.gov.au/hospitals-and-health-services/quality-safety-service/patient-](https://www2.health.vic.gov.au/hospitals-and-health-services/quality-safety-service/patient-experience-survey)  
17 [experience-survey](https://www2.health.vic.gov.au/hospitals-and-health-services/quality-safety-service/patient-experience-survey)].
- 18 52. Bureau of Health Information. Adult admitted patient survey 2017 [Available from:  
19 [http://www.bhi.nsw.gov.au/nsw\\_patient\\_survey\\_program/adult\\_admitted\\_patient\\_survey](http://www.bhi.nsw.gov.au/nsw_patient_survey_program/adult_admitted_patient_survey)].
- 20 53. Grant J, Khan J, Taylor A. Measuring consumer experience. SA public hospital inpatients  
21 annual report, April 2016. Adelaide, SA: Population Research & Outcome Studies; 2016.
- 22 54. Elliott MN, Lehrman WG, Goldstein EH, Giordano LA, Beckett MK, Cohea CW, et al. Hospital  
23 survey shows improvements in patient experience. *Health Affairs*. 2010;29(11):2061-7.
- 24 55. Anhang Price R, Elliott MN, Zaslavsky AM, Hays RD, Lehrman WG, Rybowski L, et al.  
25 Examining the role of patient experience surveys in measuring health care quality. *Medical Care*  
26 *Research and Review*. 2014;71(5):522-54.
- 27 56. Doyle C, Lennox L, Bell D. A systematic review of evidence on the links between patient  
28 experience and clinical safety and effectiveness. *BMJ Open*. 2013;3(1).
- 29 57. Freed GL, Allen AR. Variation in outpatient consultant physician fees in Australia by specialty  
30 and state and territory. *The Medical Journal of Australia*. 2017;206(4):176-80.
- 31 58. Hillis DJ, Watters DA, Malisano L, Bailey N, Rankin D. Variation in the costs of surgery:  
32 seeking value. *The Medical Journal of Australia*. 2017;206(4):153-4.
- 33 59. OpsCost. Compare hospital prices 2013 [Available from: <http://www.opscost.com/>].
- 34 60. Healthcare Bluebook. Never overpay for healthcare again 2017 [Available from:  
35 [https://healthcarebluebook.com/page\\_Default.aspx](https://healthcarebluebook.com/page_Default.aspx)].
- 36 61. FairHealth Consumer. Estimate your healthcare expenses 2017 [Available from:  
37 <https://www.fairhealthconsumer.org/>].
- 38 62. Hibbard JH, Greene J, Sofaer S, Firminger K, Hirsh J. An experiment shows that a well-  
39 designed report on costs and quality can help consumers choose high-value health care. *Health*  
40 *Affairs*. 2012;31(3):560-8.
- 41 63. Emmert M, Schlesinger M. Hospital quality reporting in the United States: Does report card  
42 design and incorporation of patient narrative comments affect hospital choice? *Health Services*  
43 *Research*. 2017;52(3):933-58.
- 44 64. Hibbard JH, Sofaer S. Best practices in public reporting series. Rockville, MD: Agency for  
45 Healthcare Research and Quality; 2010.
- 46 65. Ketelaar NA, Faber MJ, Elwyn G, Westert GP, Braspenning JC. Comparative performance  
47 information plays no role in the referral behaviour of GPs. *BMC Family Practice*. 2014;15(1):146.
- 48 66. Doering N, Maarse H. The use of publicly available quality information when choosing a  
49 hospital or health-care provider: the role of the GP. *Health Expectations*. 2015;18(6):2174-82.
- 50 67. Coughlin SS. Recall bias in epidemiologic studies. *Journal of Clinical Epidemiology*.  
51 1990;43(1):87-91.
- 52 68. Bhandari A, Wagner T. Self-reported utilization of health care services: Improving  
53 measurement and accuracy. *Medical Care Research and Review*. 2006;63(2):217-35.
- 54  
55  
56  
57  
58  
59  
60

1  
2  
3  
4  
5  
6  
7  
8  
9  
10  
11  
12  
13  
14  
15  
16  
17  
18  
19  
20  
21  
22  
23  
24  
25  
26  
27  
28  
29  
30  
31  
32  
33  
34  
35  
36  
37  
38  
39  
40  
41  
42  
43  
44  
45  
46  
47  
48  
49  
50  
51  
52  
53  
54  
55  
56  
57  
58  
59  
60

For peer review only

**Table 1 Demographic characteristic of respondents (n=243)**

|                                          | N (%)       |
|------------------------------------------|-------------|
| <b>Cancer Type</b>                       |             |
| <i>Breast</i>                            | 155 (63.8%) |
| <i>Bowel</i>                             | 65 (26.7%)  |
| <i>Lung</i>                              | 23 (9.5%)   |
| <b>Diagnosis period</b>                  |             |
| <i>Less than 12 months</i>               | 176 (72.4%) |
| <i>Between 1 and 5 years ago</i>         | 65 (26.7%)  |
| <i>More than 5 years ago</i>             | 2 (0.8%)    |
| <b>Gender</b>                            |             |
| <i>Male</i>                              | 49 (20.2%)  |
| <i>Female</i>                            | 191 (78.6%) |
| <i>Missing</i>                           | 3 (1.2%)    |
| <b>Age groups</b>                        |             |
| <i>25-34</i>                             | 3 (1.2%)    |
| <i>35-44</i>                             | 13 (5.3%)   |
| <i>45-54</i>                             | 36 (14.8%)  |
| <i>55-64</i>                             | 77 (31.7%)  |
| <i>65-74</i>                             | 73 (30.0%)  |
| <i>75-84</i>                             | 32 (13.2%)  |
| <i>85+</i>                               | 6 (2.5%)    |
| <i>Missing</i>                           | 3 (1.2%)    |
| <b>Country of birth</b>                  |             |
| <i>Australia</i>                         | 186 (76.5%) |
| <i>Others<sup>a</sup></i>                | 53 (21.8%)  |
| <i>Missing</i>                           | 4 (1.6%)    |
| <b>Language spoken at home</b>           |             |
| <i>English</i>                           | 230 (94.7%) |
| <i>Others<sup>b</sup></i>                | 8 (3.3%)    |
| <i>Missing</i>                           | 5 (2.1%)    |
| <b>Marital status</b>                    |             |
| <i>Single/never married</i>              | 10 (4.1%)   |
| <i>Married/in a defacto relationship</i> | 193 (79.4%) |
| <i>Widowed/divorced/separated</i>        | 37 (15.2%)  |
| <i>Missing</i>                           | 3 (1.2%)    |
| <b>Education</b>                         |             |
| <i>Postgraduate</i>                      | 25 (10.3%)  |
| <i>Bachelor</i>                          | 45 (18.5%)  |
| <i>Diploma/certificate</i>               | 75 (30.9%)  |
| <i>High school</i>                       | 93 (38.3%)  |
| <i>Missing</i>                           | 5 (2.1%)    |
| <b>Employment</b>                        |             |
| <i>Full-time</i>                         | 45 (18.5%)  |

1  
2  
3  
4  
5  
6  
7  
8  
9  
10  
11  
12  
13  
14  
15  
16  
17  
18  
19  
20  
21  
22  
23  
24  
25  
26  
27  
28  
29  
30  
31  
32  
33  
34  
35  
36  
37  
38  
39  
40  
41  
42  
43  
44  
45  
46  
47  
48  
49  
50  
51  
52  
53  
54  
55  
56  
57  
58  
59  
60

|                                              |             |
|----------------------------------------------|-------------|
| <i>Part-time/casual</i>                      | 34 (14.0%)  |
| <i>Self-employed</i>                         | 18 (7.4%)   |
| <i>Retired/pensioner/unemployed</i>          | 124 (51.0%) |
| <i>Other<sup>f</sup></i>                     | 18 (7.4%)   |
| <i>Missing</i>                               | 4 (1.6%)    |
| <b>Occupation (limited to those working)</b> |             |
| <i>Manager</i>                               | 22 (22.7%)  |
| <i>Professional</i>                          | 39 (40.2%)  |
| <i>Technician or trades worker</i>           | 4 (4.1%)    |
| <i>Community of personal service worker</i>  | 3 (3.1%)    |
| <i>Clerical or administrative worker</i>     | 15 (15.5%)  |
| <i>Sales worker</i>                          | 0 (0.0%)    |
| <i>Machinery operator or driver</i>          | 0 (0.0%)    |
| <i>Labourer</i>                              | 0 (0.0%)    |
| <i>Never worked for a wage</i>               | 0 (0.0%)    |
| <i>Other</i>                                 | 13 (13.4%)  |
| <i>Missing</i>                               | 1 (1.0%)    |
| <b>Household income</b>                      |             |
| <i>Less than \$25,000</i>                    | 22 (9.1%)   |
| <i>\$25,000 to \$49,999</i>                  | 51 (21.0%)  |
| <i>\$50,000 to \$99,999</i>                  | 69 (28.4%)  |
| <i>\$100,000 or more</i>                     | 51 (21.0%)  |
| <i>Prefer not to stay</i>                    | 36 (14.8%)  |
| <i>Missing</i>                               | 14 (5.8%)   |
| <b>Health care benefits</b>                  |             |
| <i>Yes</i>                                   | 107 (44.0%) |
| <i>No</i>                                    | 134 (55.1%) |
| <i>Missing</i>                               | 2 (0.8%)    |
| <b>Private health insurance</b>              |             |
| <i>Yes</i>                                   | 235 (96.7%) |
| <i>Hospital cover only</i>                   | 28 (11.9%)  |
| <i>Extra's cover only</i>                    | 1 (0.4%)    |
| <i>Hospital and extras cover</i>             | 206 (87.7%) |
| <i>No</i>                                    | 5 (2.1%)    |
| <i>Missing</i>                               | 3 (1.2%)    |

<sup>a</sup>others include Argentina, Bosnia and Herzegovina, Canada, China, Croatia, Denmark, England, France, Germany, Hungary, India, Iran, Ireland, Italy, Malta, New Zealand, Philippines, Romania, Scotland, Taiwan, The Netherlands, Uruguay, USA, Vietnam and Wales.

<sup>b</sup>others include Danish, Farsi, French, Italian, Mandarin, Serbian and sign language.

<sup>c</sup>others include those who are currently not working due to their illness and home duties.

**Table 2 Factors influencing hospital choice\***

|                                              | N (%)       |
|----------------------------------------------|-------------|
| Specialist                                   | 218 (89.7%) |
| Distance of the hospital from home           | 57 (23.5%)  |
| Reputation of the hospital                   | 57 (23.5%)  |
| Own experience                               | 44 (18.1%)  |
| General practitioners                        | 42 (17.3%)  |
| Length of waiting list                       | 37 (15.2%)  |
| Health insurer provider                      | 20 (8.2%)   |
| Family members/friends                       | 22 (9.1%)   |
| Hospital catchment area                      | 17 (7.0%)   |
| Size of the hospital                         | 4 (1.6%)    |
| Hospital/other website                       | 3 (1.2%)    |
| <b>Performance reporting website</b>         | 0 (0.0%)    |
| Booklet/leaflet or someone else at GP clinic | 0 (0.0%)    |

\*total does not reflect 100% as patients could select multiple factors

**Table 3 Barriers affecting the use of PPR information\***

|                                   | N (%)       |
|-----------------------------------|-------------|
| Not aware                         | 179 (73.7%) |
| Not relevant                      | 26 (10.7%)  |
| Results about own condition       | 23 (9.5%)   |
| Accuracy of the information       | 8 (3.3%)    |
| No internet access                | 7 (2.9%)    |
| Too difficult to understand       | 3 (1.2%)    |
| It was out of date                | 2 (0.8%)    |
| Unsure how to use the information | 0 (0.0%)    |

\*total does not reflect 100% as patients could select multiple factors

**Table 4 Preferred types of PPR information\***

|                                   | N (%)       |
|-----------------------------------|-------------|
| Costs of surgery                  | 144 (59.3%) |
| Complications rates               | 141 (58.0%) |
| Successful recovery               | 138 (56.8%) |
| Patient's experience/satisfaction | 132 (54.3%) |
| Medical errors                    | 110 (45.3%) |
| Waiting times                     | 109 (44.9%) |
| Readmission rates                 | 91 (37.4%)  |
| Mortality rates                   | 72 (29.6%)  |
| Length of stay                    | 45 (18.5%)  |

\*total does not reflect 100% as patients could select multiple factors

## How to complete this questionnaire

In this survey we talk about information you might have seen in newspapers, reports or websites that has to do with 'public performance reporting information' about hospitals in Australia. This is information about the quality of hospitals in Australia and is available to Australian residents. For example, information about waiting times in hospitals, the number of people that got infections when they went to hospital, and the length of waiting lists for elective surgery. Images from the 'MyHospitals' website which provide public performance reporting information about hospitals are shown below:

The screenshot shows the MyHospitals website homepage. At the top, there is a navigation bar with links: Home, Our reports, Find hospitals, Compare hospitals, About the data, and About MyHospitals. The main content area is divided into several sections. On the left, there is a search bar for hospitals. In the center, there is a section titled 'Learn about your local hospital' with a sub-heading 'Search and compare performance information for more than 1,000 Australian public and private hospitals.' Below this, there are three interactive tool categories: 'Compare hospitals', 'Map search', and 'Our indicators'. Each category has a brief description and a 'Go to' button. On the right, there is a 'Latest reports' sidebar with a 'View all reports' button and a 'Latest data' section with a 'Download the data' button.

The screenshot shows the 'Compare hospitals' page on the MyHospitals website. The page title is 'Compare hospitals' and the subtitle is 'Use our interactive tools to see how your hospital performs against others'. The main content area is divided into four sections, each with a brief description and buttons to view interactive data or table data. The sections are: 'Financial performance - Efficiency of public hospitals from 2011-12 to 2013-14', 'Financial performance - Relative efficiency of public hospitals in 2011-12', 'Healthcare-associated *Staphylococcus aureus* bloodstream infections', and 'Cancer surgery waiting times'.

Source: <http://www.myhospitals.gov.au/> (Permission received from the Australian Institute of Health and Welfare to publish the images under the CC BY-NC-ND 3.0 license.)

Please answer every question you can. If you are unsure about how to answer a question make your response the closest answer you can, or write a response in the 'other' box.

Please read the instructions about each question carefully. Some questions require you to give only one response, others allow you to mark more than 1 option.

Sometimes you will find the box you have marked has an instruction to go to another question. By following the instructions carefully you will be able to move past questions that do not apply to you.

- Please put a cross in the box next to the answer you choose like this:
- If you make a mistake or wish to change a response, scribble out the mistake and put a cross in the correct box like this:
- Print clearly when written responses are required
- Return completed questionnaire in the reply paid envelope

➤ **The questionnaire starts here at Q1.**

**Q1. If you have been diagnosed with any of the following conditions, please indicate approximately how long ago the diagnosis was made. If you had several diagnoses, please indicate approximately how long ago the most recent diagnosis was made.**

Mark only one period of time for the condition picked. Please give your best estimate.

| I was diagnosed with or had... | Less than 12 months ago  | Between 1 and 5 years ago | More than 5 years ago    | I never had this         |
|--------------------------------|--------------------------|---------------------------|--------------------------|--------------------------|
| Breast cancer                  | <input type="checkbox"/> | <input type="checkbox"/>  | <input type="checkbox"/> | <input type="checkbox"/> |
| Bowel cancer                   | <input type="checkbox"/> | <input type="checkbox"/>  | <input type="checkbox"/> | <input type="checkbox"/> |
| Lung cancer                    | <input type="checkbox"/> | <input type="checkbox"/>  | <input type="checkbox"/> | <input type="checkbox"/> |

**Q2. Have you had surgery in a hospital in Australia for the cancer listed at Q1 in the last 12 months (i.e. between 1<sup>st</sup> January and 31<sup>st</sup> December 2016)?**

Yes

No

- If you **do not** have any of the conditions listed at Q1 and you **did not** undergo cancer surgery in a hospital in Australia between 1<sup>st</sup> January and 31<sup>st</sup> December 2016 as stated in Q2, you are not eligible to complete this questionnaire. There is no need for you to return this questionnaire. Thank you for your interest.
- If you **do** have any of the conditions listed at Q1 and you **had cancer surgery** in a hospital in Australia between 1<sup>st</sup> January and 31<sup>st</sup> December 2016 as stated in Q2, please **continue** and complete the questionnaire. The questions relate specifically to when you were seeking surgical treatment for the cancer you indicated at Q1.



## Hospital stay

**Q3. Which hospital did you attend for the cancer surgery you indicated at Q1?** (Choose ONE answer)

- A public hospital
- A private hospital

**Q4. Were you treated in the hospital for the cancer surgery as...**(Choose ONE answer)

- a public patient (no cost to you)
- a private patient (costs covered entirely by your health insurance)
- a private patient (costs partly covered by your health insurance, and partly by you)
- a private patient (costs covered entirely by you)

## Hospital choice

**Q5. Which of the following information types or factors helped you to make a decision about which hospital to be treated at for the cancer listed at Q1?** (Mark all that you used)

- |                                                                           |                                                                     |
|---------------------------------------------------------------------------|---------------------------------------------------------------------|
| <input type="checkbox"/> General practitioner (GP)                        | <input type="checkbox"/> Hospital catchment area                    |
| <input type="checkbox"/> Specialist/consultant                            | <input type="checkbox"/> Distance of the hospital from home         |
| <input type="checkbox"/> Health insurer provider                          | <input type="checkbox"/> Reputation of the hospital                 |
| <input type="checkbox"/> Booklet/leaflet                                  | <input type="checkbox"/> Size of the hospital (i.e. number of beds) |
| <input type="checkbox"/> Hospital website                                 | <input type="checkbox"/> Length of waiting list (i.e. surgery)      |
| <input type="checkbox"/> Other internet site (i.e. community forum)       | <input type="checkbox"/> None of the above                          |
| <input type="checkbox"/> Performance reporting website (i.e. MyHospitals) | <input type="checkbox"/> Other (please list)                        |
| <input type="checkbox"/> Family members/friends                           |                                                                     |
| <input type="checkbox"/> Own experience                                   |                                                                     |
| <input type="checkbox"/> Someone else at GP clinic                        |                                                                     |

**Q6. Were you able to personally choose the hospital that you went to?** (Choose ONE answer)

- I did not have a preference
- Yes
- No → If no, did you want to choose it?  Yes  No

**Q7. At the time that you went to hospital, were you aware of ‘public performance reporting information’ about hospitals? For example, information on the *MyHospitals* website, which you can use to compare hospitals? (Choose ONE answer)**

No → (Go to Q9)

Yes → Did you use ‘public performance reporting information’ to help you choose a hospital?  Yes  No

If yes, how was the information helpful? (Please describe)

If no, why was the information not helpful? (Please describe)

**Q8. How important was ‘public performance reporting information’ about hospitals in helping you choose the hospital that you went to? (Choose ONE answer)**

|                          |                          |                          |                          |                          |
|--------------------------|--------------------------|--------------------------|--------------------------|--------------------------|
| Unimportant              | Of little<br>importance  | Somewhat<br>important    | Important                | Very<br>important        |
| <input type="checkbox"/> |

**Q9. Have any of the following stopped you from using ‘public performance reporting information’ about hospitals when choosing a hospital? (Mark as many answers as apply)**

- |                                                                                |                                                                           |
|--------------------------------------------------------------------------------|---------------------------------------------------------------------------|
| <input type="checkbox"/> I was concerned about the accuracy of the information | <input type="checkbox"/> I only wanted to know results about my condition |
| <input type="checkbox"/> It was too difficult to understand                    | <input type="checkbox"/> It was out of date                               |
| <input type="checkbox"/> It was not relevant to me                             | <input type="checkbox"/> Other (Please describe)                          |
| <input type="checkbox"/> I did not know about it                               |                                                                           |
| <input type="checkbox"/> I was unsure how to use the information               |                                                                           |
| <input type="checkbox"/> I had no internet access                              |                                                                           |

**Q10. How would you like to get information about how hospitals in Australia are performing?** (Choose ONE answer)

- A printed book or directory
- Mobile phone apps
- I do not want this information
- I do not want to see the information but I want my GP or other healthcare provider to see it and tell me about it
- Websites
- Other (Please describe)

**Q11. Of the different types of 'public performance reporting information' about hospitals listed below, which would you most like to use?** (Mark as many answers as apply)

- How long people stayed in hospital
- The number of people with health problems or complications (e.g. infections) after their surgery
- The number of people that were readmitted to hospital because they had continued problems
- How much the surgery will cost me
- The experience or satisfaction of other people
- The number of people with minimal or no health problems after the surgery (i.e. successful surgery)
- How long people waited for their surgery
- The number of people that died during their surgery or after their care
- The number of surgical or nursing mistakes that harm other people
- Other (Please describe)

**Q12. At what level do you think 'public performance reporting information' about hospitals should be reported (e.g. in the MyHospitals website)? At the level of...** (Choose ONE answer)

- Individual doctors (where you CAN see the performance of individual doctors)
- Specific clinical units within hospitals (where individual doctors are NOT identified)
- Hospitals as a whole (where specific doctors and/or the unit where they work are NOT identified)

**Q13. Please rank each of the following areas of information in order of importance to you with 1 being the most important and 9 being the least important?** (Put the numbers 1 to 9 beside each type of information)

- How long people waited for their surgery
- The number of people that were readmitted to hospital because they had continued problems
- The number of people with health problems or complications (e.g. infections) after their surgery
- The number of people with minimal or no health problems after the surgery (i.e. successful surgery)
- How much the surgery will cost me
- How long people stayed in hospital
- The number of surgical or nursing mistakes that harm other people
- The experience or satisfaction of other people
- The number of people that died during their surgery or after their care

1  
2  
3  
4  
5  
6  
7  
8  
9  
10  
11  
12  
13  
14  
15  
16  
17  
18  
19  
20  
21  
22  
23  
24  
25  
26  
27  
28  
29  
30  
31  
32  
33  
34  
35  
36  
37  
38  
39  
40  
41  
42  
43  
44  
45  
46  
47  
48  
49  
50  
51  
52  
53  
54  
55  
56  
57  
58  
59  
60

**Q14. If the information you said was important to you at Q11 was publicly available, then how important do you think 'public performance reporting information' about hospitals would be to you in the future if you or a family member needed to choose a hospital for elective treatment? (Choose ONE answer)**

Unimportant

Of little  
importance

Somewhat  
important

Important

Very  
important

**Q15. Do you have any concerns about using 'public performance reporting information' about hospitals when making a decision about which hospital to choose? (Please describe)**

For peer review only

**Q16. Do you have any other comments or experiences you would like to share that are related to 'public performance reporting information' about hospitals? (Please describe)**

For peer review only

## About you

For each question, please give one response

### Gender

- Female  Male  Transgender/intersex/other

Your age in years

Country of birth

What language do you mainly speak at home?

Your postcode

Your state

### Marital status

- Single/Never married  Married/In a de facto relationship  Widowed  Divorced/Separated

### Do you live...

- with your spouse, partner or family members  in a share house (with non-relatives)  
 alone  others (*please specify*)

### Highest level (or equivalent) of education you completed

- Year 8 or below  Diploma/Advance diploma  
 High school year 9 or 10  Bachelor degree  
 High school year 11 or 12  Postgraduate degree (e.g. Masters, PhD)  
 Certificate (e.g. TAFE training)

### Employment status

- Working full time  Student  
 Working part time or casual  Retired or pensioner  
 Self-employed  Other (*Please specify*)  
 Unemployed

**Main area of occupation** (If retired, please indicate your previous occupation group)

- Manager  Machinery operator or driver (e.g. bus)  
 Professional  Labourer  
 Technician or trades worker  Never worked for a wage  
 Community or personal service worker  Other (Please specify)  
 Clerical or administrative worker   
 Sales worker

**Current approximate annual household income (before tax)**

- Less than \$25,000  \$100,000 to \$149,999  
 \$25,000 to \$49,999  \$150,000 or more  
 \$50,000 to \$74,999  I prefer not to say  
 \$75,000 to \$99,999

**Please indicate if you have a health care or other health benefits card**

- Yes (e.g. Health Care Card, Veterans Affairs, Seniors)  
 No

**Please indicate if you have private health insurance**

- Yes → **What type of private health insurance do you have?**  
 Hospital cover ONLY  
 Extra's cover ONLY  
 Hospital AND Extras cover  
 No

**Your email address**


Your e-gift card will be sent to your chosen email address. If you do not have an email address, list your home address. Please print clearly. This section with your email or postal address will not be kept with the information you have provided, therefore your questionnaire will remain anonymous.

**Thank you for your participation in this questionnaire. Please place the questionnaire in the reply paid envelope and post it. You do not have to use a stamp. If you have misplaced the reply paid envelope, please use a plain envelope (no stamp is necessary) and address to:**

**Dr Khic-Houy Prang Reply Paid 78439**  
**Centre for Health Policy, The University of Melbourne**  
**Level 4, 207 Bouverie Street, Carlton VIC 3010, Australia**

**Appendix B**

## Medicare Benefits Schedule procedure codes

|               |                                                                                                         |
|---------------|---------------------------------------------------------------------------------------------------------|
| Breast cancer | 30299, 30300, 30302, 30303, 31506, 31509, 31512, 31515, 31519, 31524, 31530, 31533, 31536, 31548, 45527 |
| Bowel cancer  | 32006, 32023, 32024, 32025, 32026, 32028, 32039, 35404, 35406, 32000, 32003, 32004, 32005               |
| Lung cancer   | 30696, 38438, 38440, 38441, 38812, 41898                                                                |

STROBE Statement—Checklist of items that should be included in reports of *cross-sectional studies*

|                              | Item No | Recommendation                                                                                                                                                                                                                                                                                                                                                                                                                             |
|------------------------------|---------|--------------------------------------------------------------------------------------------------------------------------------------------------------------------------------------------------------------------------------------------------------------------------------------------------------------------------------------------------------------------------------------------------------------------------------------------|
| <b>Title and abstract</b>    | 1       | (a) Indicate the study's design with a commonly used term in the title or the abstract <a href="#">p.1</a><br>(b) Provide in the abstract an informative and balanced summary of what was done and what was found <a href="#">p.2</a>                                                                                                                                                                                                      |
| <b>Introduction</b>          |         |                                                                                                                                                                                                                                                                                                                                                                                                                                            |
| Background/rationale         | 2       | Explain the scientific background and rationale for the investigation being reported <a href="#">pp.4-5</a>                                                                                                                                                                                                                                                                                                                                |
| Objectives                   | 3       | State specific objectives, including any prespecified hypotheses <a href="#">p.6</a>                                                                                                                                                                                                                                                                                                                                                       |
| <b>Methods</b>               |         |                                                                                                                                                                                                                                                                                                                                                                                                                                            |
| Study design                 | 4       | Present key elements of study design early in the paper <a href="#">p.7</a>                                                                                                                                                                                                                                                                                                                                                                |
| Setting                      | 5       | Describe the setting, locations, and relevant dates, including periods of recruitment, exposure, follow-up, and data collection <a href="#">p.8</a>                                                                                                                                                                                                                                                                                        |
| Participants                 | 6       | (a) Give the eligibility criteria, and the sources and methods of selection of participants <a href="#">p.8</a>                                                                                                                                                                                                                                                                                                                            |
| Variables                    | 7       | Clearly define all outcomes, exposures, predictors, potential confounders, and effect modifiers. Give diagnostic criteria, if applicable <a href="#">p.7</a>                                                                                                                                                                                                                                                                               |
| Data sources/<br>measurement | 8*      | For each variable of interest, give sources of data and details of methods of assessment (measurement). Describe comparability of assessment methods if there is more than one group <a href="#">p.7</a>                                                                                                                                                                                                                                   |
| Bias                         | 9       | Describe any efforts to address potential sources of bias <a href="#">NA</a>                                                                                                                                                                                                                                                                                                                                                               |
| Study size                   | 10      | Explain how the study size was arrived at <a href="#">p.8</a>                                                                                                                                                                                                                                                                                                                                                                              |
| Quantitative variables       | 11      | Explain how quantitative variables were handled in the analyses. If applicable, describe which groupings were chosen and why <a href="#">NA</a>                                                                                                                                                                                                                                                                                            |
| Statistical methods          | 12      | (a) Describe all statistical methods, including those used to control for confounding <a href="#">p.9</a><br>(b) Describe any methods used to examine subgroups and interactions <a href="#">NA</a><br>(c) Explain how missing data were addressed <a href="#">NA</a><br>(d) If applicable, describe analytical methods taking account of sampling strategy <a href="#">NA</a><br>(e) Describe any sensitivity analyses <a href="#">NA</a> |
| <b>Results</b>               |         |                                                                                                                                                                                                                                                                                                                                                                                                                                            |
| Participants                 | 13*     | (a) Report numbers of individuals at each stage of study—eg numbers potentially eligible, examined for eligibility, confirmed eligible, included in the study, completing follow-up, and analysed <a href="#">p.9</a><br>(b) Give reasons for non-participation at each stage <a href="#">p.9</a><br>(c) Consider use of a flow diagram <a href="#">NA</a>                                                                                 |
| Descriptive data             | 14*     | (a) Give characteristics of study participants (eg demographic, clinical, social) and information on exposures and potential confounders <a href="#">p.9</a><br>(b) Indicate number of participants with missing data for each variable of interest\ <a href="#">Table 1</a>                                                                                                                                                               |
| Outcome data                 | 15*     | Report numbers of outcome events or summary measures <a href="#">pp.10-11 (in text). and Tables 1, 2,3 and 4</a>                                                                                                                                                                                                                                                                                                                           |
| Main results                 | 16      | (a) Give unadjusted estimates and, if applicable, confounder-adjusted estimates and their precision (eg, 95% confidence interval). Make clear which confounders were                                                                                                                                                                                                                                                                       |



|                          |    |                                                                                                                                                                                            |
|--------------------------|----|--------------------------------------------------------------------------------------------------------------------------------------------------------------------------------------------|
|                          |    | adjusted for and why they were included <b>NA</b>                                                                                                                                          |
|                          |    | (b) Report category boundaries when continuous variables were categorized <b>NA</b>                                                                                                        |
|                          |    | (c) If relevant, consider translating estimates of relative risk into absolute risk for a meaningful time period <b>NA</b>                                                                 |
| Other analyses           | 17 | Report other analyses done—eg analyses of subgroups and interactions, and sensitivity analyses <b>NA</b>                                                                                   |
| <b>Discussion</b>        |    |                                                                                                                                                                                            |
| Key results              | 18 | Summarise key results with reference to study objectives <b>pp.14-15</b>                                                                                                                   |
| Limitations              | 19 | Discuss limitations of the study, taking into account sources of potential bias or imprecision. Discuss both direction and magnitude of any potential bias <b>p.18</b>                     |
| Interpretation           | 20 | Give a cautious overall interpretation of results considering objectives, limitations, multiplicity of analyses, results from similar studies, and other relevant evidence <b>pp.15-17</b> |
| Generalisability         | 21 | Discuss the generalisability (external validity) of the study results <b>p.18</b>                                                                                                          |
| <b>Other information</b> |    |                                                                                                                                                                                            |
| Funding                  | 22 | Give the source of funding and the role of the funders for the present study and, if applicable, for the original study on which the present article is based <b>p.19</b>                  |

\*Give information separately for exposed and unexposed groups.

**Note:** An Explanation and Elaboration article discusses each checklist item and gives methodological background and published examples of transparent reporting. The STROBE checklist is best used in conjunction with this article (freely available on the Web sites of PLoS Medicine at <http://www.plosmedicine.org/>, Annals of Internal Medicine at <http://www.annals.org/>, and Epidemiology at <http://www.epidem.com/>). Information on the STROBE Initiative is available at [www.strobe-statement.org](http://www.strobe-statement.org).

# BMJ Open

## Public performance reporting and hospital choice: A cross-sectional study of patients undergoing cancer surgery in the Australian private healthcare sector

|                                 |                                                                                                                                                                                                                                                                                                                                                                                                                                                                                                        |
|---------------------------------|--------------------------------------------------------------------------------------------------------------------------------------------------------------------------------------------------------------------------------------------------------------------------------------------------------------------------------------------------------------------------------------------------------------------------------------------------------------------------------------------------------|
| Journal:                        | <i>BMJ Open</i>                                                                                                                                                                                                                                                                                                                                                                                                                                                                                        |
| Manuscript ID                   | bmjopen-2017-020644.R2                                                                                                                                                                                                                                                                                                                                                                                                                                                                                 |
| Article Type:                   | Research                                                                                                                                                                                                                                                                                                                                                                                                                                                                                               |
| Date Submitted by the Author:   | 07-Mar-2018                                                                                                                                                                                                                                                                                                                                                                                                                                                                                            |
| Complete List of Authors:       | Prang, Khic-Houy; The University of Melbourne, Centre for Health Policy<br>Canaway, Rachel; The University of Melbourne, Centre for Health Policy<br>Bismark, Marie; The University of Melbourne, Centre for Health Policy<br>Dunt, David; The University of Melbourne, Centre for Health Policy<br>Miller, Julie; Royal Melbourne Hospital, Endocrine Surgery Unit; The<br>University of Melbourne, Department of Surgery<br>Kelaher, Margaret; The University of Melbourne, Centre for Health Policy |
| <b>Primary Subject Heading</b>: | Health policy                                                                                                                                                                                                                                                                                                                                                                                                                                                                                          |
| Secondary Subject Heading:      | Public health                                                                                                                                                                                                                                                                                                                                                                                                                                                                                          |
| Keywords:                       | public performance reporting, hospital choice, quality information, cancer, questionnaire                                                                                                                                                                                                                                                                                                                                                                                                              |
|                                 |                                                                                                                                                                                                                                                                                                                                                                                                                                                                                                        |

SCHOLARONE™  
Manuscripts

Only

1  
2  
3 Public performance reporting and hospital choice: A cross-sectional study of patients undergoing  
4  
5 cancer surgery in the Australian private healthcare sector  
6

7 Khic-Houy Prang<sup>1\*</sup>, Rachel Canaway<sup>1</sup>, Marie Bismark<sup>1</sup>, David Dunt<sup>1</sup>, Julie A. Miller<sup>2,3</sup> and Margaret  
8  
9 Kelaher<sup>1</sup>  
10  
11  
12  
13

14  
15 <sup>1</sup> Centre for Health Policy, Melbourne School of Population and Global Health, The University of  
16  
17 Melbourne, Victoria Australia  
18

19 <sup>2</sup> Endocrine Surgery Unit, The Royal Melbourne Hospital, Victoria Australia  
20

21 <sup>3</sup> Department of Surgery, Melbourne Medical School, The University of Melbourne, Victoria Australia  
22  
23  
24  
25  
26

27 \* Corresponding Author: Khic-Houy Prang  
28

29 Phone: +61 3 90358778  
30

31 Email: [khic-houy.prang@unimelb.edu.au](mailto:khic-houy.prang@unimelb.edu.au)  
32  
33  
34  
35  
36  
37  
38  
39  
40  
41  
42  
43  
44  
45  
46  
47  
48  
49  
50  
51  
52  
53  
54  
55  
56  
57  
58  
59  
60

## Abstract

**Objectives** National mandatory public performance reporting (PPR) for Australian public hospitals, including measures of cancer waiting times, was introduced in 2011. PPR is voluntary for private hospitals. The aims of this study were to assess whether PPR of hospital data is used by patients with breast, bowel or lung cancer when selecting a hospital for elective surgery and how PPR could be improved to meet their information needs.

**Design** A national cross-sectional postal questionnaire.

**Setting** Australian private healthcare sector.

**Participants** Private patients with breast, bowel or lung cancer who attended a public or private hospital for elective surgery (n=243) in 2016.

**Outcome measures** Patients' choice of hospital, use of PPR information and preferred areas of PPR information. Descriptive and conventional qualitative content analyses were conducted.

**Results** Most respondents (94%) attended a private hospital. Almost half could choose a hospital. Choice of hospital was not influenced by PPR data (92% unaware) but by their specialist (90%). Respondents considered PPR to be important (70%) but they did not want to see the information, preferring their general practitioners (GPs) to tell them about it (40%). Respondents considered surgery costs (59%), complications (58%), and recovery success rates (57%) to be important areas of information that should be publicly reported. Almost half suggested that quality indicators should be reported at the individual clinician level. Analysis of the open-ended questions identified four themes: 1) decision-making factors; 2) data credibility; 3) unmet information needs; and 4) unintended consequences.

**Conclusions** PPR of hospital data had no substantial impact on patients' choice of hospital. Nonetheless, many respondents expressed interest in using it in the future. To increase PPR awareness and usability, personalised and integrated information on cost and quality of hospitals is

1  
2  
3 required. Dissemination of PPR information via specialists and GPs could assist patients to interpret  
4  
5 the data and support decision-making.  
6  
7

#### 8 **Strengths and limitations of the study**

9

- 10 • This study used a national cross-sectional questionnaire in the private healthcare sector to  
11 assess the use of PPR of hospital data to inform hospital choice, among patients with breast,  
12  
13 bowel or lung cancer.  
14  
15
- 16 • The results are not generalisable to other cancer elective surgeries, younger patients or  
17  
18 public hospital settings, because of the non-population representative characteristics of  
19  
20 respondents.  
21  
22
- 23 • Given the nature of the study, there is a risk of recall bias, in particularly among elderly  
24  
25 respondents.  
26  
27  
28  
29  
30  
31  
32  
33  
34  
35  
36  
37  
38  
39  
40  
41  
42  
43  
44  
45  
46  
47  
48  
49  
50  
51  
52  
53  
54  
55  
56  
57  
58  
59  
60

## Introduction

There are growing efforts within healthcare systems internationally to measure and publicly disseminate healthcare providers' (i.e. hospitals and clinicians) performance data for greater transparency, to increase accountability, and to improve quality of care [1, 2]. Public performance reporting (PPR) of healthcare providers' data is aimed at improving the quality of care by guiding consumers to select high quality providers over low quality providers. It aims to stimulate quality improvement among providers by identifying areas in which they underperform. These pathways are interconnected by providers' motivation to maintain or increase their market share [3].

In many countries, such as the United States (US) and the United Kingdom (UK), PPR of hospital and individual clinician's performance data has been a central feature of government health policy [4]. In Australia, national mandatory PPR of public hospital data was introduced in 2011. All public hospitals are required to provide data to the Australian Institute of Health and Welfare (AIHW) which is then reported via the MyHospitals website [5]. Quality indicators reported on the MyHospitals website are underpinned by the Performance and Accountability Framework. The framework identifies 48 indicators, of which 17 are hospital indicators and 31 are primary healthcare indicators. Hospital indicators publicly reported include: hand hygiene; staphylococcus aureus infections; time patients spent in emergency department; cancer surgery waiting times; and financial performance of public hospitals. Indicators yet to be publicly reported, due to their associated methodological issues, include: measures of mortality; unplanned readmission rates; patient experiences; and access to services by type of service compared to need.

PPR on the MyHospitals website is voluntary for private hospitals. In 2015-16, there were 630 private hospitals in Australia [6] and 36% voluntarily contributed to the MyHospitals website, but they did not necessarily report on all of the quality indicators (as public hospitals are required to do) [5]. Large private healthcare providers (e.g. Healthscope with 46 hospitals [7] and Ramsay Health Care with 73 hospitals [8]) publish their own PPR websites to help patients make informed decisions.

1  
2  
3 In addition, most states/territory governments also have their own PPR websites (e.g. the Victorian  
4 Health Services Performance [9], and New South Wales Bureau of Health Information [10]). Quality  
5 indicators vary across MyHospitals, private healthcare providers, and states/territory governments  
6 websites. Examples of additional quality indicators reported on the private healthcare providers and  
7 states/territory governments websites, but not on the MyHospitals website, include: patient  
8 experiences; Apgar scores for babies (assessment of a baby's wellbeing after birth); patient falls;  
9 pressure injuries; and rehabilitation outcomes.  
10  
11  
12  
13  
14  
15  
16

17  
18 Prior research indicates that PPR changes healthcare providers' behaviour but has limited  
19 impact on consumers' healthcare decision-making [11-13]. Previous research also suggests that  
20 consumers want more choice over their healthcare [14]. However, results from surveys conducted in  
21 the US and the Netherlands showed that most consumers did not use, or barely used, PPR  
22 information when selecting a specialist or hospital [15-18]. This may be because many consumers  
23 are not aware of PPR information or do not have access to it, or they do not understand or trust it  
24 [11, 18, 19]. Instead, consumers rely on various sources of information to inform their choice of  
25 hospital, including: advice from their general practitioner (GP); their previous experience; family and  
26 friends' experiences; the reputation of the hospital; and the distance of the hospital from their home  
27 [16, 17, 20, 21].  
28  
29  
30  
31  
32  
33  
34  
35  
36  
37  
38  
39

40 Given the recent introduction of PPR in Australia, there have been few studies on the  
41 impacts of PPR on Australian consumers' choice of hospitals [22], particularly in the private  
42 healthcare sector [23]. The focus was on patients with access to private healthcare undergoing  
43 elective surgery for cancer – because for these patients, choice of hospital is likely to be possible,  
44 and cancer waiting times are publicly reported for all public and some private hospitals [5]. It should  
45 be noted that most surgery for cancer is categorised as 'elective' because it falls outside of the  
46 category of 'emergency' surgery. Elective surgery does not then only encompass non-essential or  
47 cosmetic surgery. In Australia, surgery for cancer is categorised as elective because patient hospital  
48  
49  
50  
51  
52  
53  
54  
55  
56  
57  
58  
59  
60

1  
2  
3 admission can be delayed for at least 24 hours. Public patients are then placed on a hospital waiting-  
4  
5 list for planned surgery, with recommended maximum wait times classified as: urgent (within 30  
6  
7 days); semi-urgent (within 90 days); or non-urgent [5]. In the private sector, patients can usually  
8  
9 access elective surgery more quickly than in the public sector, especially for semi-urgent or non-  
10  
11 urgent cases. Better understanding of factors that influence hospital choice, including PPR  
12  
13 information, can help explain consumers' decision-making processes, and inform policy-makers on  
14  
15 whether greater resources should be allocated to PPR. Therefore, the present study aimed to assess  
16  
17 (among patients with breast, bowel or lung cancer): whether PPR of hospital data was used to  
18  
19 inform their choice of hospital; factors that influence their choice of hospital; their level of demand  
20  
21 for PPR; barriers to their use of PPR; and how PPR could be improved to meet their information  
22  
23 needs.  
24

## 25 26 27 **Methods**

### 28 29 *Australian healthcare system*

30  
31  
32 Australia has a universal, publicly funded, health insurance scheme (Medicare) that provides  
33  
34 free access to public hospitals [24]. Private healthcare insurance is also available and encouraged by  
35  
36 government policy (i.e. high income earners receive a tax penalty for not purchasing, and middle  
37  
38 income earners receive a private health cover rebate) [25]. In 2014-15, there were 10.1 million (57%)  
39  
40 Australian adults with private healthcare insurance [26]. Private patients can choose to be treated in  
41  
42 either public or private hospitals. To access public or private hospital for non-emergency care,  
43  
44 patients must be referred by their GP. Issues around payment of private hospital bills are generally  
45  
46 discussed during the consultations [27]. Medicare covers 75% of the Medicare Benefits Schedule  
47  
48 (MBS) fee for private patients. The remaining 25% is either paid entirely by private healthcare  
49  
50 insurers, co-paid by patients with their private healthcare insurer, or self-funded if the patient does  
51  
52 not have private healthcare insurance. Compared to public patients, private patients can exercise  
53  
54 greater choice in specialist, hospital, and timing of procedures.  
55  
56  
57  
58  
59  
60



### *Study design*

This study was part of a larger research program which aimed to improve understanding of how PPR might improve quality of care in public and private hospitals in Australia, by examining the perspectives of multiple stakeholders. Previous components of the research program included interviews with healthcare consumer advocates, providers, purchasers (public and private funders of healthcare services) [28], senior hospital clinical administrators [29, 30], and general practitioners [31]. This component of the research program used a quantitative approach to understand the use of PPR information when selecting a hospital for surgery among patients with breast, bowel or lung cancer. A national cross-sectional study design of the private healthcare sector was conducted using postal questionnaires.

### *Questionnaire design*

We developed a short questionnaire with four sections: 1) cancer type; 2) hospital stay; 3) hospital choice; and 4) about you (see supplementary file 1). The first section included questions about the type of cancer participants had, period of diagnosis, and confirmation of cancer surgical treatments between 1<sup>st</sup> January and 31<sup>st</sup> December 2016. Section two included questions about the type of hospital attended (i.e. public or private hospital) and patient status (i.e. public or private). The third section included questions on factors influencing hospital choice, awareness and use of the available PPR information, preferred areas of PPR information (i.e. quality and performance indicators), level of data presentation, the importance of PPR information, and barriers to using PPR information. Two open-ended questions were included to capture other issues, concerns or experiences of PPR that respondents might want to share. The final section captured demographic characteristics such as gender, age, marital status, education, employment status, occupation, income, and health care insurance status.

### *Patient and public involvement*

1  
2  
3 The questionnaire was piloted with a consumer group from Peter MacCallum Cancer Centre  
4 in Victoria [32] to identify ambiguities or difficult questions, and to ensure that it could be completed  
5 in a timely manner. The consumer group included five women aged between 35-45 years; four  
6 previously had cancer – including three in the last 12 months. The questionnaire was revised in  
7 response to their comments. The consumer group was not involved in the recruitment and conduct  
8 of the study. Upon completion of the study, a summary of the results will be provided to the  
9 consumer group.  
10  
11  
12  
13  
14  
15  
16  
17

### 18 *Sample*

19  
20  
21 Participants were identified and contacted by the Australian Government Department of  
22 Human Services (DHS) through their MBS records (including procedure codes). Eligibility criteria  
23 included: participants aged 18 years and over; diagnosed with breast, bowel or lung cancer; and  
24 attended an Australian hospital for cancer surgical treatments between 1<sup>st</sup> January and 31<sup>st</sup>  
25 December 2016. MBS is a list of Medicare services subsidised by the Australian government [33].  
26 Therefore, the sample included only those who made a Medicare claim (i.e. private patients in public  
27 or private hospitals). Patients who did not make a Medicare claim (i.e. public patients in public  
28 hospital in which there are no costs to the patients) were not included because their records are  
29 managed by individual state governments. The selection of the appropriate MBS procedure codes  
30 (see supplementary file 2) was done by the researchers in consultation with a surgeon who  
31 specialised in cancer care. In total, 29,793 eligible participants were identified (52% with breast  
32 cancer, 32% with bowel cancer and 16% with lung cancer). Stratified sampling by cancer type was  
33 performed for 1,000 eligible participants. Samples within each stratum were selected with simple  
34 random sampling.  
35  
36  
37  
38  
39  
40  
41  
42  
43  
44  
45  
46  
47  
48  
49

### 50 *Data collection*

1  
2  
3 The postal questionnaire was open between April and July 2017. Study invitations were  
4  
5 mailed out to a random sample of 1,000 eligible participants by the Australia Government DHS. A  
6  
7 sample size calculation for this cross-sectional study was conducted [34]. The confidence level was  
8  
9 set at 90% with a 5% margin of error. The estimate proportion of the population who used PPR when  
10  
11 selecting a hospital was set at 0.4. The required sample size was 261 participants. The expected  
12  
13 response rate, based on previous research conducted by the Centre for Health Policy, was  
14  
15 approximately 20-30%. Researchers were not provided with contact details of the selected sample.  
16  
17 Study invitations included a cover letter from the DHS, a plain language explanation of the study, the  
18  
19 questionnaire and a reply-paid envelope addressed to the researchers. Each participant received a  
20  
21 \$10 e-gift card as reimbursement for their time if they included an email address with their return  
22  
23 questionnaire.  
24

#### 25 26 27 *Data analysis*

28  
29 Descriptive analyses of the closed-ended questions were conducted using the Statistical  
30  
31 Package for the Social Sciences (SPSS) version 23. A conventional qualitative content analysis of the  
32  
33 two open-ended questions was conducted using QSR NVivo 11. Conventional qualitative content  
34  
35 analysis aims to interpret meaning inductively from the content of text data without using  
36  
37 preconceived categories [35]. Codes were derived directly from the text data and then grouped into  
38  
39 categories that represented similar meaning.  
40  
41

#### 42 43 *Ethical considerations*

44  
45 Ethical approval for the study was granted by the Melbourne School of Population and  
46  
47 Global Health Human Ethics Advisory Group, The University of Melbourne. The return of the  
48  
49 questionnaire was taken as an indication of voluntary consent to participate.  
50  
51

## 52 53 **Results**

#### 54 55 56 *Sample characteristics*

1  
2  
3 In total, 243 participants completed the questionnaire (24% response rate). Compared to  
4  
5 respondents, non-respondents were more likely to be male and younger. The sample was somewhat  
6  
7 representative of the Australian population who has had cancer elective surgery. Patients with  
8  
9 breast (64% vs. 58%) and lung cancer (9% vs. 7%) were slightly over-represented whereas patients  
10  
11 with bowel cancer were under-represented (27% vs 35%) [36].  
12  
13

14 The characteristics of the respondents are described in Table 1. Almost 64% of respondents  
15  
16 were diagnosed with breast cancer, 27% with bowel, and 10% with lung cancer, with the majority  
17  
18 diagnosed in the last 12 months (70%). Almost all respondents were women (79%) aged between 55  
19  
20 and 74 years (62%). The majority were born in Australia (77%) and spoke English at home (95%), and  
21  
22 were married/in a defacto relationship (79%). Almost 30% had a bachelor/postgraduate degree (a  
23  
24 slight under-representation of Australian women with a bachelor degree or higher [37]). Half of the  
25  
26 respondents were pensioners/retirees and 40% were employed. Of those employed, over 60%  
27  
28 worked in a professional or managerial position. Over half had a household income less than  
29  
30 AUD\$100,000 (the median annual gross household income in Australia for the 2015-16 period was  
31  
32 \$84,032 [38]). Fewer than half (44%) held a healthcare benefits card (e.g. healthcare card which  
33  
34 entitles access to cheaper prescription medicines). Almost all respondents (97%) had private health  
35  
36 insurance that included hospital treatment, and most (88%) had insurance that also covered 'extras'  
37  
38 such as outpatient physiotherapy.  
39  
40

#### 41 42 *Hospital stay and choice* 43 44

45 Respondents self-reported that 94% attended a private hospital and 6% attended a public  
46  
47 hospital for cancer surgery. Among those who attended a public hospital, 87% were private patients  
48  
49 and 13% were public patients. The small proportion of public patients in the sample may suggest  
50  
51 that some of the care provided involved a private component (e.g. certain diagnostic imaging and  
52  
53 pathology services are not fully covered by Medicare [39]). Alternatively, this could have been a  
54  
55 clerical error in the MBS records. Costs of private hospitals were reportedly co-paid by the  
56  
57

1  
2  
3 respondents and their health insurer (49%), or fully covered by their health insurer (47%). Three  
4  
5 percent of respondents self-funded their treatments. Almost half (48%) of respondents attended  
6  
7 their preferred hospital, 28% did not have a choice in hospital, and 25% did not have a hospital  
8  
9 preference. Of those who did not have a choice of hospital, 37% indicated that they would have liked  
10  
11 to have had a choice.  
12

#### 13 14 *Awareness and use of PPR information*

15  
16  
17 Ninety-two percent of respondents reported no awareness of PPR information. Of those  
18  
19 who were aware of it, 88% did not use it when selecting a hospital and 56% considered PPR to be of  
20  
21 little or no importance to inform their choice of hospital. Reasons cited for not using PPR  
22  
23 information included limited choice of hospital, as well as prior experience with certain hospitals,  
24  
25 and trust in the advice of their doctor: *"We only have a private and public hospital where I live, so*  
26  
27 *choice was limited regardless of the information provided"* (Respondent #111); *"I was too sick to do*  
28  
29 *any research at the time. I took advice from my specialist"* (Respondent #113).  
30  
31

#### 32 33 *Factors influencing hospital choice*

34  
35 Table 2 presents the factors that influenced the choice of hospital. PPR data did not  
36  
37 influence choice of hospital for any respondent. The most common factors that impacted hospital  
38  
39 selection were: specialists (90%); reputation of the hospital (24%); distance to the hospital from  
40  
41 home (24%); patients' previous experience (18%); and GPs advice (17%).  
42  
43

#### 44 45 *Barriers affecting the use of PPR*

46  
47 Table 3 shows the barriers affecting the use of PPR in selecting a hospital. The most common  
48  
49 barriers impeding the use of PPR data included: lack of PPR awareness (74%); lack of PPR relevance  
50  
51 (11%); and interested in PPR for their condition solely (10%).  
52  
53

#### 54 55 *Source of PPR information*

1  
2  
3 Despite the lack of PPR awareness and barriers to the use of PPR, overall, 71% of  
4 respondents considered PPR to be 'very important' or 'important' to inform their choice or family  
5 members' future choice of hospital. However, most did not want to access PPR information  
6 themselves, preferring their GPs or other healthcare providers to tell them about it (40%). Other  
7 preferred sources of PPR information included: websites (35%); printed books/directories (10%); and  
8 mobile phone applications (3%). A proportion of respondents did not want any PPR information  
9 (9%).

### 10 11 12 13 14 15 16 17 18 *Preferred types of PPR information*

19  
20  
21 Table 4 lists the types of PPR information that respondents most wanted access to. Over half  
22 of all respondents considered costs of surgery (59%), complication rates (58%), recovery success  
23 rates (57%), and information on patient's experience and satisfaction (54%) to be important areas to  
24 report on. Respondents indicated that they preferred PPR information to be reported at the  
25 individual clinician-level (48%), followed by hospital-level (31%), and specific clinical unit-level within  
26 hospitals (18%).

### 27 28 29 30 31 32 33 34 *Additional comments and concerns related to PPR*

35  
36  
37 Almost half of respondents (48%) provided information in one or both open-ended  
38 questions. Analysis of their responses revealed four themes: 1) decision-making factors; 2) data  
39 credibility; 3) unmet information needs; and 4) unintended consequences. Themes two, three and  
40 four provided further insights into PPR of hospital data which were not captured in the quantitative  
41 findings.

#### 42 43 44 45 46 47 48 49 *1. Decision-making factors*

50  
51 Consistent with the quantitative findings, choice of hospital was determined by advice from  
52 specialists or GPs rather than PPR information. Although respondents perceived PPR to be important  
53 for hospital accountability and transparency, they reported that their choices were restricted to the

1  
2  
3 hospital or hospitals where their specialist performed surgery. Other respondents had relied on their  
4  
5 GP for a specialist recommendation:  
6

7  
8 "I did not check on the hospital. My surgeon was recommended as the 'best' by my GP  
9  
10 who I trust and she could operate quickly and worked out of a specific hospital – no  
11  
12 choice to be made." (Respondent #39)  
13

14  
15 Some respondents preferred their GPs to be informed about PPR information and relay it to  
16  
17 them, or direct them to an appropriate website or other resource to inform their decision.  
18  
19 Additional factors influencing patients' selection of hospital included family and friends.  
20

## 21 22 2. *Data credibility* 23

24  
25 Although over 90% of respondents reported not being aware of PPR, they nonetheless  
26  
27 raised concerns with the reliability, validity and timeliness of the data. Some were cynical and  
28  
29 suspicious of the data, questioning its trustworthiness:  
30

31  
32 "The hospital's information accuracy. No hospital is going to let 'issues' out, otherwise  
33  
34 loss of patients means loss of money and so it goes. In an ideal world, we could  
35  
36 'believe' the information and make our decisions as consumers with accuracy. I don't  
37  
38 believe the information will truly reflect the real world. I have seen government  
39  
40 departments fudge stuff." (Respondent #200)  
41  
42

43  
44 Some respondents expressed concern around the lack of clarity around who collected the  
45  
46 data (i.e. independent body), how it was collated (i.e. qualifications and experiences of the people,  
47  
48 data quality processes), and why certain areas of information (i.e. quality and performance  
49  
50 indicators) were chosen to be reported.  
51

## 52 3. *Unmet information needs* 53 54 55 56 57 58 59 60

1  
2  
3 Respondents reported the following areas of information (currently not available on the  
4 MyHospitals website) to be of interest: patient experiences; hospital cleanliness; food quality;  
5 nursing standards (e.g. bedside manners); and hospital facilities (e.g. available entertainments such  
6 as movie/tablet rentals). However, several respondents worried that reporting patient experiences  
7 may be misleading and damaging to a hospital's reputation if there were no site moderators:  
8  
9  
10  
11  
12

13  
14 "As a patient I am not a medical expert as are other patients (not medical experts). We  
15 can comment on the level of care but not the medical treatment. So, my opinion and  
16 that of other patients is very subjective. Just like 'TripAdvisor' someone could rubbish a  
17 hospital with no medical grounds or expertise." (Respondent #52)  
18  
19  
20  
21  
22

#### 23 4. *Unintended consequences*

24  
25  
26 Additional PPR concerns raised by respondents included unnecessary stress and increased  
27 pressure on hospital staff because of PPR. Some respondents likened PPR of hospital data to the  
28 education reporting system which compares how a school is performing on the National Assessment  
29 Plan Literacy and Numeracy (NAPLAN) tests with other similar schools. A respondent claimed that  
30 increased focus on reporting in the education sector resulted in poorer education and expressed  
31 concern that PPR of hospital data could similarly lead to a deterioration in the quality of care  
32 provided. Some respondents suggested that PPR systems need to be design in a way which  
33 minimises administrative burden and is supportive of hospital staff:  
34  
35  
36  
37  
38  
39  
40  
41  
42

43  
44 "It would have to be carefully designed to be fair to all involved without creating  
45 excessive administrative and pressure and hierarchy, as sometimes happens in schools  
46 reporting – overly burdensome for staff, so counter-productive." (Respondent #57)  
47  
48  
49  
50

## 51 **Discussion**

52  
53  
54 The results of the study, which are reflective of experiences in the private healthcare sector,  
55 highlighted that many respondents did not use PPR information to inform their hospital choice,  
56  
57



1  
2  
3 mainly because they were not aware of it. This is consistent with previous studies [15-18]. Instead,  
4  
5 as patients, they were guided by their specialists when selecting a hospital. Almost half of  
6  
7 respondents reported that they did have a choice of hospital, which suggests they were involved in  
8  
9 the decision-making process with their specialists. Others have reached similar conclusion [40].  
10  
11 Although determining how the specialists and patients selected hospitals was not part of this study,  
12  
13 the responses to the open-ended questions revealed that the availability of specialists, and where  
14  
15 he/she performed the elective surgery, generally determined which hospital was attended. Future  
16  
17 research is required to explore the decision-making process between specialists and patients, and  
18  
19 whether the dissemination of PPR information to patients via specialists (as potential mediators of  
20  
21 patient choice) is feasible.  
22  
23

24  
25 The limited awareness of PPR among respondents may be associated with the lack of  
26  
27 mandatory PPR for private hospitals. Over a third of Australian private hospitals voluntarily  
28  
29 participate on the MyHospitals website [5]. Some private healthcare providers (e.g. Healthscope and  
30  
31 Ramsay Health Care) publish their own PPR websites [7, 8]. However, Ramsay Health Care reports  
32  
33 aggregated data on quality indicators for all of their private hospitals combined, instead of individual  
34  
35 hospitals, clinicians or conditions – this limits its relevance and usability for healthcare consumers.  
36  
37 Recently, Healthscope launched the MyHealthscope website which allows healthcare consumers to  
38  
39 view and compare the performance of each of their hospitals against the industry rate. Again, the  
40  
41 results are not stratified by conditions nor reported at the individual clinician-level.  
42  
43

44  
45 Almost half of the study respondents proposed that publicly reported hospital-related  
46  
47 information (which includes quality and performance indicators) be reported at the level of  
48  
49 individual clinicians. In the US and the UK, ratings of individual clinicians working in hospitals are  
50  
51 publicly reported [4]. There is evidence that public reporting of such data has led to improvement in  
52  
53 the quality of care [41, 42]. However, unintended consequences such as ‘cream-skimming’ and  
54  
55 ‘gaming’ (i.e. avoiding treating high risk patients who are likely to have poor outcomes) have also  
56  
57

1  
2  
3 been reported [43, 44]. In Australia, debates surrounding PPR of individual specialist-level continues  
4  
5 [45-47].  
6  
7

8 Consistent with previous research, we found the following performance indicators to be of  
9  
10 relevance to patients: costs of surgery; complications rates; success rates; patient experiences;  
11  
12 hospital cleanliness; and food quality [48, 49]. None of these quality indicators are currently  
13  
14 reported on the MyHospitals website [5]. Patient experience is one of the 17 indicators  
15  
16 recommended to be publicly reported on the MyHospitals website; methodological issues (i.e. lack  
17  
18 of national comparable information), however, have prevented this. In contrast, several state-based  
19  
20 performance websites do report on patient experience, complications, and standards of cleaning –  
21  
22 to various level of details [9, 10, 50, 51]. The Bureau of Health Information in New South Wales is the  
23  
24 most thorough and interactive in its web-based reporting [10]. Although some of the quality  
25  
26 indicators collected by the state governments are similar, there is no consistency in the tools used to  
27  
28 collect the data. For example, the inpatient experiences surveys conducted in Victoria (92 questions)  
29  
30 [52], New South Wales (99 questions) [53], and South Australia (71 questions) [54], are drawn from  
31  
32 various sources including the NHS inpatient survey, the Picker Institute Questionnaire, the Patient  
33  
34 Experience Information Development Working group, each state's key performance indicators, and a  
35  
36 national set of core common patient experience questions. This limits comparison at the national  
37  
38 level, but allows hospital comparison within states. In other countries, such as England, the  
39  
40 Netherlands and the US, patient reported experience and outcomes are routinely collected and  
41  
42 available for consumers to view. These measures are found to be positively associated with delivery  
43  
44 of care [55], clinical outcomes [56], clinical effectiveness and patient safety [57].  
45  
46  
47

48 None of the performance websites in Australia describe costs of surgery. There are no costs  
49  
50 associated with attending an Australian public hospital as a public patient. It may not be surprising  
51  
52 then that costs of surgery, and associated out-of-pocket costs, are not reported. However, knowing  
53  
54 out-of-pocket costs was considered important for patients with private healthcare insurance. Costs  
55  
56  
57

1  
2  
3 of elective surgery were fully covered by private healthcare insurance in only 47% of cases, with one  
4  
5 respondent commenting that the out-of-pocket cost for her breast cancer surgery was AUD\$7,500.  
6  
7 In Australia, there are limited publicly available sources for patients to access information on out-of-  
8  
9 pocket costs for inpatient and outpatient care [58, 59]. The Royal Australasian College of Surgeons,  
10  
11 in collaboration with Medibank (an Australian private health insurer), publishes surgical variance  
12  
13 reports which describe average out-of-pocket charges for surgeons and other medical services (i.e.  
14  
15 anaesthetist, assistant surgeon and for diagnostics). Their reports are not targeted at consumers but  
16  
17 for specialists, to encourage improvement in private hospital clinical outcomes and patient care. In  
18  
19 the US, report cards and reporting websites (e.g. OpsCost [60], Healthcare Bluebook [61], Fair Health  
20  
21 consumers [62]) have been developed to help consumers compare hospital quality and cost of care.  
22  
23 Evaluation of report cards with cost information, in an experimental setting, showed that some  
24  
25 employees avoided low-cost providers because they perceived low-cost care as substandard, and  
26  
27 higher prices as a proxy for better quality [63]. The authors suggested that quality indicators  
28  
29 including costs data may improve consumers' decision-making. Given the limited research in this  
30  
31 area, and the growth in comparative quality and cost websites, further studies are warranted to  
32  
33 evaluate its accessibility, usefulness and content for consumers.  
34  
35

36  
37 Although many respondents considered PPR to be important for transparency and  
38  
39 accountability, they were sceptical of the reliability and validity of PPR data. The reason for this was  
40  
41 unclear given that most patients were not aware of PPR. Some comments from the open-ended  
42  
43 questions demonstrated lack of understanding of how PPR data is collected and collated, and the  
44  
45 methodologies used to construct the quality indicators. In support, past research suggests that  
46  
47 consumers distrust PPR data because they have difficulties interpreting the information [11, 19, 64].  
48  
49 In the US, consumer-focused best practice guidelines have been developed for presenting,  
50  
51 promoting and disseminating PPR data to improve its comprehensibility and perceived trustworthiness  
52  
53 [49, 65].  
54  
55  
56  
57  
58  
59  
60

1  
2  
3 Patients preferred that the dissemination of PPR information occur via their GPs. In  
4 Australia, GPs are gatekeepers to secondary care with patients requiring GPs' referrals for non-  
5 emergency access. Therefore, GPs are in a good position to help patients interpret PPR data or guide  
6 patients to appropriate resources to support decision-making. However, past research shows that  
7 GPs rarely used PPR information when referring patients to hospitals because they were unaware of  
8 PPR data and they had concerns about its reliability and validity [31, 66, 67]. Addressing these  
9 barriers are essential if GPs are to be a viable source of PPR information for their patients.  
10  
11  
12  
13  
14  
15  
16  
17

### 18 *Limitations*

19  
20  
21 These findings should be interpreted carefully due to several limitations. Given the non-  
22 population representative characteristics of respondents (older women who used private hospitals),  
23 the results are not generalisable to other cancer elective surgeries, younger patients and public  
24 hospitals. Future research is needed to gather data from a larger sample, and to expand this study to  
25 other elective surgeries and public patients in public hospital (who could be recruited via the  
26 individual state/territory government which hold their records). Recall bias may have also affected  
27 our results, particularly among elderly patients [68, 69]. However, we attempted to minimise recall  
28 bias by ensuring that only patients who had cancer elective surgery within the last 12 months were  
29 eligible to complete the questionnaire.  
30  
31  
32  
33  
34  
35  
36  
37  
38  
39  
40

### 41 *Conclusions*

42  
43  
44 PPR of hospital data appears to have no substantial impact on selection of hospitals among a  
45 randomly selected cohort of Australian patients with breast, bowel or lung cancer who were treated  
46 as private patients. Almost one third of respondents reported that they had no choice of hospital,  
47 and current PPR information did not appear to meet their information needs. Nevertheless, a  
48 substantial number of respondents expressed interest in PPR information and claimed that they  
49 would like to use it for their future decision-making. Given the growing prevalence of performance  
50  
51  
52  
53  
54  
55  
56  
57  
58  
59  
60

1  
2  
3 data being publicly disseminated through the internet, further efforts are required to develop and  
4  
5 include quality and cost indicators that are of interest to patients. While this study focused on  
6  
7 people treated for cancer, it has relevance for all consumers of healthcare. Future dissemination of  
8  
9 PPR information to patients via specialists and GPs may enable patients to make clinically and  
10  
11 financially informed choices with the assistance of their medical doctors.  
12

### 13 14 **Contributors**

15  
16  
17 MK, DD and MB conceptualised and designed the study and obtained its funding. KP, RC and MK  
18  
19 contributed to the design of the questionnaire. KP, MK and JM selected the sample (MBS procedure  
20  
21 codes). KP collected, analysed and interpreted the data and drafted the manuscript. RC, MB, DD, JM  
22  
23 and MK contributed to data interpretation and critically reviewed the manuscript. All authors read  
24  
25 and approved the final manuscript.  
26

### 27 28 **Funding**

29  
30  
31 This research was funded by Medibank Better Health Foundation. Views expressed are those of the  
32  
33 authors and not the funding agency.  
34

### 35 36 **Competing interests**

37  
38  
39 The authors declare that they have no competing interests.  
40

### 41 42 **Data sharing statement**

43  
44  
45 The dataset analysed during the current study are not publicly available due to participants'  
46  
47 confidentiality.  
48

### 49 50 **Acknowledgements**

51  
52  
53 We wish to thank: Medibank Better Health Foundation for funding this research; Steve Gilbert from  
54  
55 the Australian Department of Human Services for the mail out of the questionnaires; the consumer  
56  
57

group from Peter MacCallum Cancer Centre for piloting the questionnaire; and all the participants who took the time to complete the questionnaire.

## References

1. Cacace M, Ettelt S, Brereton L, Pedersen JS, Nolte E. How health systems make available information on service providers: Experience in seven countries. *Rand Health Quarterly*. 2011;1(1):11.
2. Rechel B, McKee M, Haas M, Marchildon GP, Bousquet F, Blümel M, et al. Public reporting on quality, waiting times and patient experience in 11 high-income countries. *Health Policy*. 2016;120(4):377-83.
3. Berwick DM, James B, Coye MJ. Connections between quality measurement and improvement. *Medical Care*. 2003;41(1):I-30-I-8.
4. Marshall MN, Shekelle PG, Davies HT, Smith PC. Public reporting on quality in the United States and the United Kingdom. *Health Affairs*. 2003;22(3):134-48.
5. AIHW. MyHospitals 2017 [Available from: <http://www.myhospitals.gov.au/>].
6. Australian Bureau of Statistics. Private hospitals, Australia, 2015-16 2017 [Available from: <http://www.abs.gov.au/ausstats/abs@.nsf/Lookup/by%20Subject/4390.0~2015-16~Main%20Features~All%20Private%20Hospitals%20-%20summary~2>].
7. Healthscope Hospitals. MyHealthscope - Accreditation, quality & safety 2017 [Available from: <http://www.healthscopehospitals.com.au/quality/my-healthscope>].
8. Ramsay Health Care. Patient safety and quality 2018 [Available from: <http://www.ramsayhealth.com.au/Sustainability/Patient-Quality-and-Safety>].
9. Victoria State Government. Victorian Health Services Performance 2016 [Available from: <http://performance.health.vic.gov.au/Home.aspx>].
10. Bureau of Health Information. Healthcare Observer 2017 [Available from: [http://www.bhi.nsw.gov.au/Healthcare\\_Observer/\\_nocache](http://www.bhi.nsw.gov.au/Healthcare_Observer/_nocache)].
11. Marshall MN, Shekelle P, Leatherman S, Brook R. The public release of performance data: What do we expect to gain? A review of the evidence. *JAMA*. 2000;283(14):1866-74.
12. Fung CH, Lim Y-W, Mattke S, Damberg C, Shekelle PG. Systematic review: The evidence that publishing patient care performance data improves quality of care. *Annals of Internal Medicine*. 2008;148(2):111-23.
13. Chen J. Public reporting of health system performance: A rapid review of evidence on impact on patients, providers and healthcare organisations. *Evidence Check*. 2010.
14. Trigg L. Patients' opinions of health care providers for supporting choice and quality improvement. *Journal of Health Services Research & Policy*. 2011;16(2):102-7.
15. Schneider EC, Epstein AM. Use of public performance reports: A survey of patients undergoing cardiac surgery. *JAMA*. 1998;279(20):1638-42.
16. Abraham J, Sick B, Anderson J, Berg A, Dehmer C, Tufano A. Selecting a provider: What factors influence patients' decision making? *Journal of Healthcare Management*. 2011;56(2):99-116.
17. de Groot IB, Otten W, Smeets HJ, Marang-van de Mheen PJ. Is the impact of hospital performance data greater in patients who have compared hospitals? *BMC Health Services Research*. 2011;11(1):214.
18. Lako C, Dortant H. Why don't the Dutch use quality information in their hospital choice? Results from a survey among 479 patients from a Dutch hospital. *Health*. 2014;6(1):1-5.
19. Hibbard JH, Greene J, Daniel D. What is quality anyway? Performance reports that clearly communicate to consumers the meaning of quality of care. *Medical Care Research and Review*. 2010;67(3):275-93.

- 1  
2  
3 20. Lako CJ, Rosenau P. Demand-driven care and hospital choice. Dutch health policy toward  
4 demand-driven care: Results from a survey into hospital choice. *Health Care Analysis*. 2009;17(1):20.  
5 21. Berendsen AJ, de Jong GM, Schuling J, Bosveld HE, de Waal MW, Mitchell GK, et al. Patient's  
6 need for choice and information across the interface between primary and secondary care: A survey.  
7 *Patient Education and Counseling*. 2010;79(1):100-5.  
8 22. Cutler H, Gu Y, Olin E. Assessing choice for public hospital patients. Centre for the Health  
9 Economy, Macquarie University; 2017.  
10 23. Sheahan M, Little R, Leggat SG. Performance reporting for consumers: Issues for the  
11 Australian private hospital sector. *Australia and New Zealand Health Policy*. 2007;4(1):5.  
12 24. Australian Government Department of Human Services. Medicare services 2017 [Available  
13 from: <https://www.humanservices.gov.au/customer/subjects/medicare-services>.  
14 25. Australian Government Private Health Insurance Ombudsman. What is covered? 2017  
15 [Available from: <http://www.privatehealth.gov.au/healthinsurance/whatiscovered/>.  
16 26. Australian Bureau of Statistics. Health service usage and health related actions, Australia,  
17 2014-15 2017 [Available from:  
18 <http://www.abs.gov.au/ausstats/abs@.nsf/mf/4364.0.55.002?OpenDocument>.  
19 27. Victoria State Government. Choosing hospitals and specialist doctors 2017 [Available from:  
20 [https://www.betterhealth.vic.gov.au/health/servicesandsupport/choosing-hospitals-and-specialist-](https://www.betterhealth.vic.gov.au/health/servicesandsupport/choosing-hospitals-and-specialist-doctors)  
21 [doctors](https://www.betterhealth.vic.gov.au/health/servicesandsupport/choosing-hospitals-and-specialist-doctors).  
22 28. Canaway R, Bismark M, Dunt D, Kelaher M. Perceived barriers to effective implementation of  
23 public reporting of hospital performance data in Australia: a qualitative study. *BMC Health Services*  
24 *Research*. 2017;17(1):391.  
25 29. Canaway R, Bismark M, Dunt D, Kelaher M. Public reporting of hospital performance data:  
26 views of senior medical directors in Victoria, Australia. *Australian Health Review*. 2017:-.  
27 30. Canaway R, Bismark M, Dunt D, Kelaher M. Medical directors' perspectives on strengthening  
28 hospital quality and safety. *Journal of Health Organization and Management*. 2017;31(7-8):696-712.  
29 31. Prang K-H, Canaway R, Bismark M, Dunt D, Kelaher M. The use of public performance  
30 reporting by general practitioners: A study of perceptions and referral behaviours. *BMC Family*  
31 *Practice*. 2018;19(1):29.  
32 32. Peter MacCallum Cancer Centre. About us 2017 [Available from:  
33 <https://www.petermac.org/>.  
34 33. Australian Government Department of Health. MBS Online 2017 [Available from:  
35 <http://www.mbsonline.gov.au/internet/mbsonline/publishing.nsf/Content/Home>.  
36 34. Charan J, Biswas T. How to calculate sample size for different study designs in medical  
37 research? *Indian Journal of Psychological Medicine*. 2013;35(2):121-6.  
38 35. Hsieh H-F, Shannon SE. Three approaches to qualitative content analysis. *Qualitative Health*  
39 *Research*. 2005;15(9):1277-88.  
40 36. National Health Performance Authority. Hospital performance: Cancer surgery waiting times  
41 in public hospitals in 2012-13. 2014.  
42 37. Australian Bureau of Statistics. Education and work, Australia, May 2017 [Available from:  
43 [http://www.abs.gov.au/AUSSTATS/abs@.nsf/Lookup/6227.0Main+Features1May%202017?OpenDo](http://www.abs.gov.au/AUSSTATS/abs@.nsf/Lookup/6227.0Main+Features1May%202017?OpenDocument)  
44 [cument](http://www.abs.gov.au/AUSSTATS/abs@.nsf/Lookup/6227.0Main+Features1May%202017?OpenDocument).  
45 38. Australian Bureau of Statistics. Household income and wealth, Australia, 2015-16 2017  
46 [Available from: <http://www.abs.gov.au/ausstats/abs@.nsf/mf/6523.0>.  
47 39. Australian Government Department of Health. MRI (Magnetic Resonance Imaging) Medicare  
48 services fact sheet 2014 [Available from:  
49 <http://www.health.gov.au/internet/main/publishing.nsf/Content/mri-medicare-services-fact-sheet>.  
50 40. Wilson CT, Woloshin S, Schwartz LM. Choosing where to have major surgery: Who makes the  
51 decision? *Archives of Surgery*. 2007;142(3):242-6.  
52  
53  
54  
55  
56  
57  
58  
59  
60

- 1  
2  
3 41. Hannan EL, Sarrazin MSV, Doran DR, Rosenthal GE. Provider profiling and quality  
4 improvement efforts in coronary artery bypass graft surgery: The effect on short-term mortality  
5 among Medicare beneficiaries. *Medical Care*. 2003;41(10):1164-72.
- 6 42. Bridgewater B, Grayson AD, Brooks N, Grotte G, Fabri BM, Au J, et al. Has the publication of  
7 cardiac surgery outcome data been associated with changes in practice in northwest England: An  
8 analysis of 25 730 patients undergoing CABG surgery under 30 surgeons over eight years. *Heart*.  
9 2007;93(6):744-8.
- 10 43. Burack JH, Impellizzeri P, Homel P, Cunningham JN. Public reporting of surgical mortality: A  
11 survey of New York State cardiothoracic surgeons. *The Annals of Thoracic Surgery*. 1999;68(4):1195-  
12 200.
- 13 44. Narins CR, Dozier AM, Ling FS, Zareba W. The influence of public reporting of outcome data  
14 on medical decision making by physicians. *Archives of Internal Medicine*. 2005;165(1):83-7.
- 15 45. Canaway R, Bismark MM, Dunt D, Kelaher MA. Public reporting of clinician-level data. *The*  
16 *Medical Journal of Australia*. 2017;207(6):231-2.
- 17 46. Neil DA, Clarke S, Oakley JG. Public reporting of individual surgeon performance information:  
18 United Kingdom developments and Australian issues. *Medical Journal of Australia*. 2004;181(5):266.
- 19 47. Marasco SF, Ibrahim JE, Oakley J. Public disclosure of surgeon-specific report cards: Current  
20 status of the debate. *ANZ Journal of Surgery*. 2005;75(11):1000-4.
- 21 48. Gagliardi A, Lemieux-Charles L, Brown A, Sullivan T, Goel V. Stakeholder preferences for  
22 cancer care performance indicators. *International Journal of Health Care Quality Assurance*.  
23 2008;21(2):175-89.
- 24 49. Yegian JM, Dardess P, Shannon M, Carman KL. Engaged patients will need comparative  
25 physician-level quality data and information about their out-of-pocket costs. *Health Affairs*.  
26 2013;32(2):328-37.
- 27 50. Queensland Government. Hospital performance 2016 [Available from:  
28 <http://www.performance.health.qld.gov.au/hospitalperformance/>.  
29
- 30 51. Government of Western Australia. Our performance 2017 [Available from:  
31 <http://ww2.health.wa.gov.au/Our-performance>.  
32
- 33 52. Victoria State Government. Victorian healthcare experience survey - VHES 2017 [Available  
34 from: [https://www2.health.vic.gov.au/hospitals-and-health-services/quality-safety-service/patient-  
35 experience-survey](https://www2.health.vic.gov.au/hospitals-and-health-services/quality-safety-service/patient-experience-survey).  
36
- 37 53. Bureau of Health Information. Adult admitted patient survey 2017 [Available from:  
38 [http://www.bhi.nsw.gov.au/nsw\\_patient\\_survey\\_program/adult\\_admitted\\_patient\\_survey](http://www.bhi.nsw.gov.au/nsw_patient_survey_program/adult_admitted_patient_survey).  
39
- 40 54. Grant J, Khan J, Taylor A. Measuring consumer experience. SA public hospital inpatients  
41 annual report, April 2016. Adelaide, SA: Population Research & Outcome Studies; 2016.
- 42 55. Elliott MN, Lehrman WG, Goldstein EH, Giordano LA, Beckett MK, Cohea CW, et al. Hospital  
43 survey shows improvements in patient experience. *Health Affairs*. 2010;29(11):2061-7.
- 44 56. Anhang Price R, Elliott MN, Zaslavsky AM, Hays RD, Lehrman WG, Rybowski L, et al.  
45 Examining the role of patient experience surveys in measuring health care quality. *Medical Care*  
46 *Research and Review*. 2014;71(5):522-54.
- 47 57. Doyle C, Lennox L, Bell D. A systematic review of evidence on the links between patient  
48 experience and clinical safety and effectiveness. *BMJ Open*. 2013;3(1).
- 49 58. Freed GL, Allen AR. Variation in outpatient consultant physician fees in Australia by specialty  
50 and state and territory. *The Medical Journal of Australia*. 2017;206(4):176-80.
- 51 59. Hillis DJ, Watters DA, Malisano L, Bailey N, Rankin D. Variation in the costs of surgery:  
52 Seeking value. *The Medical Journal of Australia*. 2017;206(4):153-4.
- 53 60. OpsCost. Compare hospital prices 2013 [Available from: <http://www.opscost.com/>.  
54
- 55 61. Healthcare Bluebook. Never overpay for healthcare again 2017 [Available from:  
56 [https://healthcarebluebook.com/page\\_Default.aspx](https://healthcarebluebook.com/page_Default.aspx).  
57
- 58 62. FairHealth Consumer. Estimate your healthcare expenses 2017 [Available from:  
59 <https://www.fairhealthconsumer.org/>.  
60



63. Hibbard JH, Greene J, Sofaer S, Firminger K, Hirsh J. An experiment shows that a well-designed report on costs and quality can help consumers choose high-value health care. *Health Affairs*. 2012;31(3):560-8.
64. Emmert M, Schlesinger M. Hospital quality reporting in the United States: Does report card design and incorporation of patient narrative comments affect hospital choice? *Health Services Research*. 2017;52(3):933-58.
65. Hibbard JH, Sofaer S. Best practices in public reporting series. Rockville, MD: Agency for Healthcare Research and Quality; 2010.
66. Ketelaar NA, Faber MJ, Elwyn G, Westert GP, Braspenning JC. Comparative performance information plays no role in the referral behaviour of GPs. *BMC Family Practice*. 2014;15(1):146.
67. Doering N, Maarse H. The use of publicly available quality information when choosing a hospital or health-care provider: The role of the GP. *Health Expectations*. 2015;18(6):2174-82.
68. Coughlin SS. Recall bias in epidemiologic studies. *Journal of Clinical Epidemiology*. 1990;43(1):87-91.
69. Bhandari A, Wagner T. Self-reported utilization of health care services: Improving measurement and accuracy. *Medical Care Research and Review*. 2006;63(2):217-35.

**Table 1 Demographic characteristic of respondents (n=243)**

|                                  | N (%)       |
|----------------------------------|-------------|
| <b>Cancer Type</b>               |             |
| <i>Breast</i>                    | 155 (63.8%) |
| <i>Bowel</i>                     | 65 (26.7%)  |
| <i>Lung</i>                      | 23 (9.5%)   |
| <b>Diagnosis period</b>          |             |
| <i>Less than 12 months</i>       | 176 (72.4%) |
| <i>Between 1 and 5 years ago</i> | 65 (26.7%)  |
| <i>More than 5 years ago</i>     | 2 (0.8%)    |
| <b>Gender</b>                    |             |
| <i>Male</i>                      | 49 (20.2%)  |
| <i>Female</i>                    | 191 (78.6%) |
| <i>Missing</i>                   | 3 (1.2%)    |
| <b>Age groups</b>                |             |
| <i>25-34</i>                     | 3 (1.2%)    |
| <i>35-44</i>                     | 13 (5.3%)   |
| <i>45-54</i>                     | 36 (14.8%)  |
| <i>55-64</i>                     | 77 (31.7%)  |
| <i>65-74</i>                     | 73 (30.0%)  |
| <i>75-84</i>                     | 32 (13.2%)  |
| <i>85+</i>                       | 6 (2.5%)    |
| <i>Missing</i>                   | 3 (1.2%)    |
| <b>Country of birth</b>          |             |
| <i>Australia</i>                 | 186 (76.5%) |
| <i>Others<sup>a</sup></i>        | 53 (21.8%)  |
| <i>Missing</i>                   | 4 (1.6%)    |
| <b>Language spoken at home</b>   |             |
| <i>English</i>                   | 230 (94.7%) |

|    |                                              |             |
|----|----------------------------------------------|-------------|
| 1  |                                              |             |
| 2  |                                              |             |
| 3  | <i>Others<sup>b</sup></i>                    | 8 (3.3%)    |
| 4  | <i>Missing</i>                               | 5 (2.1%)    |
| 5  | <b>Marital status</b>                        |             |
| 6  | <i>Single/never married</i>                  | 10 (4.1%)   |
| 7  | <i>Married/in a defacto relationship</i>     | 193 (79.4%) |
| 8  | <i>Widowed/divorced/separated</i>            | 37 (15.2%)  |
| 9  | <i>Missing</i>                               | 3 (1.2%)    |
| 10 |                                              |             |
| 11 | <b>Education</b>                             |             |
| 12 | <i>Postgraduate</i>                          | 25 (10.3%)  |
| 13 | <i>Bachelor</i>                              | 45 (18.5%)  |
| 14 | <i>Diploma/certificate</i>                   | 75 (30.9%)  |
| 15 | <i>High school</i>                           | 93 (38.3%)  |
| 16 | <i>Missing</i>                               | 5 (2.1%)    |
| 17 |                                              |             |
| 18 | <b>Employment</b>                            |             |
| 19 | <i>Full-time</i>                             | 45 (18.5%)  |
| 20 | <i>Part-time/casual</i>                      | 34 (14.0%)  |
| 21 | <i>Self-employed</i>                         | 18 (7.4%)   |
| 22 | <i>Retired/pensioner/unemployed</i>          | 124 (51.0%) |
| 23 | <i>Other<sup>c</sup></i>                     | 18 (7.4%)   |
| 24 | <i>Missing</i>                               | 4 (1.6%)    |
| 25 |                                              |             |
| 26 | <b>Occupation (limited to those working)</b> |             |
| 27 | <i>Manager</i>                               | 22 (22.7%)  |
| 28 | <i>Professional</i>                          | 39 (40.2%)  |
| 29 | <i>Technician or trades worker</i>           | 4 (4.1%)    |
| 30 | <i>Community of personal service worker</i>  | 3 (3.1%)    |
| 31 | <i>Clerical or administrative worker</i>     | 15 (15.5%)  |
| 32 | <i>Sales worker</i>                          | 0 (0.0%)    |
| 33 | <i>Machinery operator or driver</i>          | 0 (0.0%)    |
| 34 | <i>Labourer</i>                              | 0 (0.0%)    |
| 35 | <i>Never worked for a wage</i>               | 0 (0.0%)    |
| 36 | <i>Other</i>                                 | 13 (13.4%)  |
| 37 | <i>Missing</i>                               | 1 (1.0%)    |
| 38 |                                              |             |
| 39 | <b>Household income</b>                      |             |
| 40 | <i>Less than \$25,000</i>                    | 22 (9.1%)   |
| 41 | <i>\$25,000 to \$49,999</i>                  | 51 (21.0%)  |
| 42 | <i>\$50,000 to \$99,999</i>                  | 69 (28.4%)  |
| 43 | <i>\$100,000 or more</i>                     | 51 (21.0%)  |
| 44 | <i>Prefer not to stay</i>                    | 36 (14.8%)  |
| 45 | <i>Missing</i>                               | 14 (5.8%)   |
| 46 |                                              |             |
| 47 | <b>Health care benefits</b>                  |             |
| 48 | <i>Yes</i>                                   | 107 (44.0%) |
| 49 | <i>No</i>                                    | 134 (55.1%) |
| 50 | <i>Missing</i>                               | 2 (0.8%)    |
| 51 |                                              |             |
| 52 | <b>Private health insurance</b>              |             |
| 53 | <i>Yes</i>                                   | 235 (96.7%) |
| 54 |                                              |             |
| 55 |                                              |             |
| 56 |                                              |             |
| 57 |                                              |             |
| 58 |                                              |             |
| 59 |                                              |             |
| 60 |                                              |             |

|                                  |             |
|----------------------------------|-------------|
| <i>Hospital cover only</i>       | 28 (11.9%)  |
| <i>Extra's cover only</i>        | 1 (0.4%)    |
| <i>Hospital and extras cover</i> | 206 (87.7%) |
| <i>No</i>                        | 5 (2.1%)    |
| <i>Missing</i>                   | 3 (1.2%)    |

<sup>a</sup>others include Argentina, Bosnia and Herzegovina, Canada, China, Croatia, Denmark, England, France, Germany, Hungary, India, Iran, Ireland, Italy, Malta, New Zealand, Philippines, Romania, Scotland, Taiwan, The Netherlands, Uruguay, USA, Vietnam and Wales.

<sup>b</sup>others include Danish, Farsi, French, Italian, Mandarin, Serbian and sign language.

<sup>c</sup>others include those who are currently not working due to their illness and home duties.

**Table 2 Factors influencing hospital choice\***

|                                              | <b>N (%)</b> |
|----------------------------------------------|--------------|
| Specialist                                   | 218 (89.7%)  |
| Distance of the hospital from home           | 57 (23.5%)   |
| Reputation of the hospital                   | 57 (23.5%)   |
| Own experience                               | 44 (18.1%)   |
| General practitioners                        | 42 (17.3%)   |
| Length of waiting list                       | 37 (15.2%)   |
| Health insurer provider                      | 20 (8.2%)    |
| Family members/friends                       | 22 (9.1%)    |
| Hospital catchment area                      | 17 (7.0%)    |
| Size of the hospital                         | 4 (1.6%)     |
| Hospital/other website                       | 3 (1.2%)     |
| <b>Performance reporting website</b>         | 0 (0.0%)     |
| Booklet/leaflet or someone else at GP clinic | 0 (0.0%)     |

\*total does not reflect 100% as patients could select multiple factors

**Table 3 Barriers affecting the use of PPR information\***

|                                   | <b>N (%)</b> |
|-----------------------------------|--------------|
| Not aware                         | 179 (73.7%)  |
| Not relevant                      | 26 (10.7%)   |
| Results about own condition       | 23 (9.5%)    |
| Accuracy of the information       | 8 (3.3%)     |
| No internet access                | 7 (2.9%)     |
| Too difficult to understand       | 3 (1.2%)     |
| It was out of date                | 2 (0.8%)     |
| Unsure how to use the information | 0 (0.0%)     |

\*total does not reflect 100% as patients could select multiple factors

**Table 4 Preferred types of PPR information\***

|                                   | N (%)       |
|-----------------------------------|-------------|
| Costs of surgery                  | 144 (59.3%) |
| Complications rates               | 141 (58.0%) |
| Successful recovery               | 138 (56.8%) |
| Patient's experience/satisfaction | 132 (54.3%) |
| Medical errors                    | 110 (45.3%) |
| Waiting times                     | 109 (44.9%) |
| Readmission rates                 | 91 (37.4%)  |
| Mortality rates                   | 72 (29.6%)  |
| Length of stay                    | 45 (18.5%)  |

\*total does not reflect 100% as patients could select multiple factors

For peer review only

## How to complete this questionnaire

In this survey we talk about information you might have seen in newspapers, reports or websites that has to do with 'public performance reporting information' about hospitals in Australia. This is information about the quality of hospitals in Australia and is available to Australian residents. For example, information about waiting times in hospitals, the number of people that got infections when they went to hospital, and the length of waiting lists for elective surgery. Images from the 'MyHospitals' website which provide public performance reporting information about hospitals are shown below:

The screenshot shows the MyHospitals website homepage. At the top, there is a navigation bar with links: Home, Our reports, Find hospitals, Compare hospitals, About the data, and About MyHospitals. The main content area is divided into several sections. On the left, there is a search bar for hospitals. In the center, there is a large image of a doctor examining a patient, with the text 'Learn about your local hospital' and 'Search and compare performance information for more than 1,000 Australian public and private hospitals.' Below this, there are three main interactive tool categories: 'Compare hospitals', 'Map search', and 'Our indicators'. Each category has a brief description and a 'Go to' button. On the right side, there is a sidebar with 'Latest reports' and 'Latest data' sections, each with a 'View all reports' or 'Download the data' button.

The screenshot shows the 'Compare hospitals' page on the MyHospitals website. The page title is 'Compare hospitals' and it includes a sub-header 'Use our interactive tools to see how your hospital performs against others'. The page lists four comparison tools: 'Financial performance - Efficiency of public hospitals from 2011-12 to 2013-14', 'Financial performance - Relative efficiency of public hospitals in 2011-12', 'Healthcare-associated Staphylococcus aureus bloodstream infections', and 'Cancer surgery waiting times'. Each tool has a brief description and buttons to 'View interactive data' or 'View table data'.

Source: <http://www.myhospitals.gov.au/> (Permission received from the Australian Institute of Health and Welfare to publish the images under the CC BY-NC-ND 3.0 license.)

Please answer every question you can. If you are unsure about how to answer a question make your response the closest answer you can, or write a response in the 'other' box.

Please read the instructions about each question carefully. Some questions require you to give only one response, others allow you to mark more than 1 option.

Sometimes you will find the box you have marked has an instruction to go to another question. By following the instructions carefully you will be able to move past questions that do not apply to you.

- Please put a cross in the box next to the answer you choose like this:
- If you make a mistake or wish to change a response, scribble out the mistake and put a cross in the correct box like this:
- Print clearly when written responses are required
- Return completed questionnaire in the reply paid envelope

➤ **The questionnaire starts here at Q1.**

**Q1. If you have been diagnosed with any of the following conditions, please indicate approximately how long ago the diagnosis was made. If you had several diagnoses, please indicate approximately how long ago the most recent diagnosis was made.**

Mark only one period of time for the condition picked. Please give your best estimate.

| I was diagnosed with or had... | Less than 12 months ago  | Between 1 and 5 years ago | More than 5 years ago    | I never had this         |
|--------------------------------|--------------------------|---------------------------|--------------------------|--------------------------|
| Breast cancer                  | <input type="checkbox"/> | <input type="checkbox"/>  | <input type="checkbox"/> | <input type="checkbox"/> |
| Bowel cancer                   | <input type="checkbox"/> | <input type="checkbox"/>  | <input type="checkbox"/> | <input type="checkbox"/> |
| Lung cancer                    | <input type="checkbox"/> | <input type="checkbox"/>  | <input type="checkbox"/> | <input type="checkbox"/> |

**Q2. Have you had surgery in a hospital in Australia for the cancer listed at Q1 in the last 12 months (i.e. between 1<sup>st</sup> January and 31<sup>st</sup> December 2016)?**

Yes

No

- If you **do not** have any of the conditions listed at Q1 and you **did not** undergo cancer surgery in a hospital in Australia between 1<sup>st</sup> January and 31<sup>st</sup> December 2016 as stated in Q2, you are not eligible to complete this questionnaire. There is no need for you to return this questionnaire. Thank you for your interest.
- If you **do** have any of the conditions listed at Q1 and you **had cancer surgery** in a hospital in Australia between 1<sup>st</sup> January and 31<sup>st</sup> December 2016 as stated in Q2, please **continue** and complete the questionnaire. The questions relate specifically to when you were seeking surgical treatment for the cancer you indicated at Q1.

## Hospital stay

**Q3. Which hospital did you attend for the cancer surgery you indicated at Q1?** (Choose ONE answer)

- A public hospital
- A private hospital

**Q4. Were you treated in the hospital for the cancer surgery as...**(Choose ONE answer)

- a public patient (no cost to you)
- a private patient (costs covered entirely by your health insurance)
- a private patient (costs partly covered by your health insurance, and partly by you)
- a private patient (costs covered entirely by you)

## Hospital choice

**Q5. Which of the following information types or factors helped you to make a decision about which hospital to be treated at for the cancer listed at Q1?** (Mark all that you used)

- |                                                                           |                                                                     |
|---------------------------------------------------------------------------|---------------------------------------------------------------------|
| <input type="checkbox"/> General practitioner (GP)                        | <input type="checkbox"/> Hospital catchment area                    |
| <input type="checkbox"/> Specialist/consultant                            | <input type="checkbox"/> Distance of the hospital from home         |
| <input type="checkbox"/> Health insurer provider                          | <input type="checkbox"/> Reputation of the hospital                 |
| <input type="checkbox"/> Booklet/leaflet                                  | <input type="checkbox"/> Size of the hospital (i.e. number of beds) |
| <input type="checkbox"/> Hospital website                                 | <input type="checkbox"/> Length of waiting list (i.e. surgery)      |
| <input type="checkbox"/> Other internet site (i.e. community forum)       | <input type="checkbox"/> None of the above                          |
| <input type="checkbox"/> Performance reporting website (i.e. MyHospitals) | <input type="checkbox"/> Other (please list)                        |
| <input type="checkbox"/> Family members/friends                           |                                                                     |
| <input type="checkbox"/> Own experience                                   |                                                                     |
| <input type="checkbox"/> Someone else at GP clinic                        |                                                                     |

**Q6. Were you able to personally choose the hospital that you went to?** (Choose ONE answer)

- I did not have a preference
- Yes
- No → If no, did you want to choose it?  Yes  No

**Q7. At the time that you went to hospital, were you aware of ‘public performance reporting information’ about hospitals? For example, information on the *MyHospitals* website, which you can use to compare hospitals? (Choose ONE answer)**

No → (Go to Q9)

Yes → Did you use ‘public performance reporting information’ to help you choose a hospital?  Yes  No

If yes, how was the information helpful? (Please describe)

If no, why was the information not helpful? (Please describe)

**Q8. How important was ‘public performance reporting information’ about hospitals in helping you choose the hospital that you went to? (Choose ONE answer)**

|                          |                          |                          |                          |                          |
|--------------------------|--------------------------|--------------------------|--------------------------|--------------------------|
| Unimportant              | Of little<br>importance  | Somewhat<br>important    | Important                | Very<br>important        |
| <input type="checkbox"/> |

**Q9. Have any of the following stopped you from using ‘public performance reporting information’ about hospitals when choosing a hospital? (Mark as many answers as apply)**

- |                                                                                |                                                                           |
|--------------------------------------------------------------------------------|---------------------------------------------------------------------------|
| <input type="checkbox"/> I was concerned about the accuracy of the information | <input type="checkbox"/> I only wanted to know results about my condition |
| <input type="checkbox"/> It was too difficult to understand                    | <input type="checkbox"/> It was out of date                               |
| <input type="checkbox"/> It was not relevant to me                             | <input type="checkbox"/> Other (Please describe)                          |
| <input type="checkbox"/> I did not know about it                               |                                                                           |
| <input type="checkbox"/> I was unsure how to use the information               |                                                                           |
| <input type="checkbox"/> I had no internet access                              |                                                                           |



**Q10. How would you like to get information about how hospitals in Australia are performing?** (Choose ONE answer)

- A printed book or directory
- Mobile phone apps
- I do not want this information
- I do not want to see the information but I want my GP or other healthcare provider to see it and tell me about it
- Websites
- Other (Please describe)

**Q11. Of the different types of 'public performance reporting information' about hospitals listed below, which would you most like to use?** (Mark as many answers as apply)

- How long people stayed in hospital
- The number of people with health problems or complications (e.g. infections) after their surgery
- The number of people that were readmitted to hospital because they had continued problems
- How much the surgery will cost me
- The experience or satisfaction of other people
- The number of people with minimal or no health problems after the surgery (i.e. successful surgery)
- How long people waited for their surgery
- The number of people that died during their surgery or after their care
- The number of surgical or nursing mistakes that harm other people
- Other (Please describe)

**Q12. At what level do you think 'public performance reporting information' about hospitals should be reported (e.g. in the MyHospitals website)? At the level of...** (Choose ONE answer)

- Individual doctors (where you CAN see the performance of individual doctors)
- Specific clinical units within hospitals (where individual doctors are NOT identified)
- Hospitals as a whole (where specific doctors and/or the unit where they work are NOT identified)

**Q13. Please rank each of the following areas of information in order of importance to you with 1 being the most important and 9 being the least important?** (Put the numbers 1 to 9 beside each type of information)

- How long people waited for their surgery
- The number of people that were readmitted to hospital because they had continued problems
- The number of people with health problems or complications (e.g. infections) after their surgery
- The number of people with minimal or no health problems after the surgery (i.e. successful surgery)
- How much the surgery will cost me
- How long people stayed in hospital
- The number of surgical or nursing mistakes that harm other people
- The experience or satisfaction of other people
- The number of people that died during their surgery or after their care

1  
2  
3  
4  
5  
6  
7  
8  
9  
10  
11  
12  
13  
14  
15  
16  
17  
18  
19  
20  
21  
22  
23  
24  
25  
26  
27  
28  
29  
30  
31  
32  
33  
34  
35  
36  
37  
38  
39  
40  
41  
42  
43  
44  
45  
46  
47  
48  
49  
50  
51  
52  
53  
54  
55  
56  
57  
58  
59  
60

**Q14. If the information you said was important to you at Q11 was publicly available, then how important do you think 'public performance reporting information' about hospitals would be to you in the future if you or a family member needed to choose a hospital for elective treatment? (Choose ONE answer)**

Unimportant

Of little  
importance

Somewhat  
important

Important

Very  
important

**Q15. Do you have any concerns about using 'public performance reporting information' about hospitals when making a decision about which hospital to choose? (Please describe)**

For peer review only

**Q16. Do you have any other comments or experiences you would like to share that are related to 'public performance reporting information' about hospitals? (Please describe)**

For peer review only

## About you

For each question, please give one response

### Gender

- Female  Male  Transgender/intersex/other

Your age in years

Country of birth

What language do you mainly speak at home?

Your postcode

Your state

### Marital status

- Single/Never married  Married/In a de facto relationship  Widowed  Divorced/Separated

### Do you live...

- with your spouse, partner or family members  in a share house (with non-relatives)  
 alone  others (please specify)

### Highest level (or equivalent) of education you completed

- Year 8 or below  Diploma/Advance diploma  
 High school year 9 or 10  Bachelor degree  
 High school year 11 or 12  Postgraduate degree (e.g. Masters, PhD)  
 Certificate (e.g. TAFE training)

### Employment status

- Working full time  Student  
 Working part time or casual  Retired or pensioner  
 Self-employed  Other (Please specify)  
 Unemployed

**Main area of occupation** (If retired, please indicate your previous occupation group)

- Manager  Machinery operator or driver (e.g. bus)  
 Professional  Labourer  
 Technician or trades worker  Never worked for a wage  
 Community or personal service worker  Other (Please specify)  
 Clerical or administrative worker  
 Sales worker

**Current approximate annual household income (before tax)**

- Less than \$25,000  \$100,000 to \$149,999  
 \$25,000 to \$49,999  \$150,000 or more  
 \$50,000 to \$74,999  I prefer not to say  
 \$75,000 to \$99,999

**Please indicate if you have a health care or other health benefits card**

- Yes (e.g. Health Care Card, Veterans Affairs, Seniors)  
 No

**Please indicate if you have private health insurance**

- Yes → **What type of private health insurance do you have?**  
 Hospital cover ONLY  
 Extra's cover ONLY  
 Hospital AND Extras cover  
 No

**Your email address**


Your e-gift card will be sent to your chosen email address. If you do not have an email address, list your home address. Please print clearly. This section with your email or postal address will not be kept with the information you have provided, therefore your questionnaire will remain anonymous.

**Thank you for your participation in this questionnaire. Please place the questionnaire in the reply paid envelope and post it. You do not have to use a stamp. If you have misplaced the reply paid envelope, please use a plain envelope (no stamp is necessary) and address to:**

**Dr Khic-Houy Prang Reply Paid 78439**  
**Centre for Health Policy, The University of Melbourne**  
**Level 4, 207 Bouverie Street, Carlton VIC 3010, Australia**

**Appendix B**

## Medicare Benefits Schedule procedure codes

|               |                                                                                                         |
|---------------|---------------------------------------------------------------------------------------------------------|
| Breast cancer | 30299, 30300, 30302, 30303, 31506, 31509, 31512, 31515, 31519, 31524, 31530, 31533, 31536, 31548, 45527 |
| Bowel cancer  | 32006, 32023, 32024, 32025, 32026, 32028, 32039, 35404, 35406, 32000, 32003, 32004, 32005               |
| Lung cancer   | 30696, 38438, 38440, 38441, 38812, 41898                                                                |

STROBE Statement—Checklist of items that should be included in reports of *cross-sectional studies*

|                              | Item No | Recommendation                                                                                                                                                                                                                                                                                                                                                                                                                             |
|------------------------------|---------|--------------------------------------------------------------------------------------------------------------------------------------------------------------------------------------------------------------------------------------------------------------------------------------------------------------------------------------------------------------------------------------------------------------------------------------------|
| <b>Title and abstract</b>    | 1       | (a) Indicate the study's design with a commonly used term in the title or the abstract <a href="#">p.1</a><br>(b) Provide in the abstract an informative and balanced summary of what was done and what was found <a href="#">p.2</a>                                                                                                                                                                                                      |
| <b>Introduction</b>          |         |                                                                                                                                                                                                                                                                                                                                                                                                                                            |
| Background/rationale         | 2       | Explain the scientific background and rationale for the investigation being reported <a href="#">pp.4-5</a>                                                                                                                                                                                                                                                                                                                                |
| Objectives                   | 3       | State specific objectives, including any prespecified hypotheses <a href="#">p.6</a>                                                                                                                                                                                                                                                                                                                                                       |
| <b>Methods</b>               |         |                                                                                                                                                                                                                                                                                                                                                                                                                                            |
| Study design                 | 4       | Present key elements of study design early in the paper <a href="#">p.7</a>                                                                                                                                                                                                                                                                                                                                                                |
| Setting                      | 5       | Describe the setting, locations, and relevant dates, including periods of recruitment, exposure, follow-up, and data collection <a href="#">p.8</a>                                                                                                                                                                                                                                                                                        |
| Participants                 | 6       | (a) Give the eligibility criteria, and the sources and methods of selection of participants <a href="#">p.8</a>                                                                                                                                                                                                                                                                                                                            |
| Variables                    | 7       | Clearly define all outcomes, exposures, predictors, potential confounders, and effect modifiers. Give diagnostic criteria, if applicable <a href="#">p.7</a>                                                                                                                                                                                                                                                                               |
| Data sources/<br>measurement | 8*      | For each variable of interest, give sources of data and details of methods of assessment (measurement). Describe comparability of assessment methods if there is more than one group <a href="#">p.7</a>                                                                                                                                                                                                                                   |
| Bias                         | 9       | Describe any efforts to address potential sources of bias <a href="#">NA</a>                                                                                                                                                                                                                                                                                                                                                               |
| Study size                   | 10      | Explain how the study size was arrived at <a href="#">p.8</a>                                                                                                                                                                                                                                                                                                                                                                              |
| Quantitative variables       | 11      | Explain how quantitative variables were handled in the analyses. If applicable, describe which groupings were chosen and why <a href="#">NA</a>                                                                                                                                                                                                                                                                                            |
| Statistical methods          | 12      | (a) Describe all statistical methods, including those used to control for confounding <a href="#">p.9</a><br>(b) Describe any methods used to examine subgroups and interactions <a href="#">NA</a><br>(c) Explain how missing data were addressed <a href="#">NA</a><br>(d) If applicable, describe analytical methods taking account of sampling strategy <a href="#">NA</a><br>(e) Describe any sensitivity analyses <a href="#">NA</a> |
| <b>Results</b>               |         |                                                                                                                                                                                                                                                                                                                                                                                                                                            |
| Participants                 | 13*     | (a) Report numbers of individuals at each stage of study—eg numbers potentially eligible, examined for eligibility, confirmed eligible, included in the study, completing follow-up, and analysed <a href="#">p.9</a><br>(b) Give reasons for non-participation at each stage <a href="#">p.9</a><br>(c) Consider use of a flow diagram <a href="#">NA</a>                                                                                 |
| Descriptive data             | 14*     | (a) Give characteristics of study participants (eg demographic, clinical, social) and information on exposures and potential confounders <a href="#">p.9</a><br>(b) Indicate number of participants with missing data for each variable of interest\ <a href="#">Table 1</a>                                                                                                                                                               |
| Outcome data                 | 15*     | Report numbers of outcome events or summary measures <a href="#">pp.10-11 (in text). and Tables 1, 2,3 and 4</a>                                                                                                                                                                                                                                                                                                                           |
| Main results                 | 16      | (a) Give unadjusted estimates and, if applicable, confounder-adjusted estimates and their precision (eg, 95% confidence interval). Make clear which confounders were                                                                                                                                                                                                                                                                       |

|                          |    |                                                                                                                                                                                            |
|--------------------------|----|--------------------------------------------------------------------------------------------------------------------------------------------------------------------------------------------|
|                          |    | adjusted for and why they were included <b>NA</b>                                                                                                                                          |
|                          |    | (b) Report category boundaries when continuous variables were categorized <b>NA</b>                                                                                                        |
|                          |    | (c) If relevant, consider translating estimates of relative risk into absolute risk for a meaningful time period <b>NA</b>                                                                 |
| Other analyses           | 17 | Report other analyses done—eg analyses of subgroups and interactions, and sensitivity analyses <b>NA</b>                                                                                   |
| <b>Discussion</b>        |    |                                                                                                                                                                                            |
| Key results              | 18 | Summarise key results with reference to study objectives <b>pp.14-15</b>                                                                                                                   |
| Limitations              | 19 | Discuss limitations of the study, taking into account sources of potential bias or imprecision. Discuss both direction and magnitude of any potential bias <b>p.18</b>                     |
| Interpretation           | 20 | Give a cautious overall interpretation of results considering objectives, limitations, multiplicity of analyses, results from similar studies, and other relevant evidence <b>pp.15-17</b> |
| Generalisability         | 21 | Discuss the generalisability (external validity) of the study results <b>p.18</b>                                                                                                          |
| <b>Other information</b> |    |                                                                                                                                                                                            |
| Funding                  | 22 | Give the source of funding and the role of the funders for the present study and, if applicable, for the original study on which the present article is based <b>p.19</b>                  |

\*Give information separately for exposed and unexposed groups.

**Note:** An Explanation and Elaboration article discusses each checklist item and gives methodological background and published examples of transparent reporting. The STROBE checklist is best used in conjunction with this article (freely available on the Web sites of PLoS Medicine at <http://www.plosmedicine.org/>, Annals of Internal Medicine at <http://www.annals.org/>, and Epidemiology at <http://www.epidem.com/>). Information on the STROBE Initiative is available at [www.strobe-statement.org](http://www.strobe-statement.org).
