# Supplementary material for: Public performance reporting and hospital choice: a cross-sectional study of patients undergoing cancer surgery in the Australian private healthcare sector
Source: PubMed Central journal article supplement — BMJ Open. 2018 Apr 27;8(4):e020644. doi: 10.1136/bmjopen-2017-020644 (PMC5922515; doi:10.1136/bmjopen-2017-020644), 2018-04-27
Supplement: bmjopen-2017-020644supp002.pdf [file bmjopen-2017-020644supp002.pdf]

## Appendix B

### Medicare Benefits Schedule procedure codes

|               |                                                                                                         |
|---------------|---------------------------------------------------------------------------------------------------------|
| Breast cancer | 30299, 30300, 30302, 30303, 31506, 31509, 31512, 31515, 31519, 31524, 31530, 31533, 31536, 31548, 45527 |
| Bowel cancer  | 32006, 32023, 32024, 32025, 32026, 32028, 32039, 35404, 35406, 32000, 32003, 32004, 32005               |
| Lung cancer   | 30696, 38438, 38440, 38441, 38812, 41898                                                                |
